# Supplementary material for: The Oral Microbiome in Periodontal Health
Source: Front Cell Infect Microbiol. 2021 Mar 22;11:629723. doi: 10.3389/fcimb.2021.629723 (PMC8019927; doi:10.3389/fcimb.2021.629723)
Supplement: Supplementary file 3 [file Table_3.xlsx]

## Sheet: List1
Name of combined taxon (CT)	CT	Oral taxon (HMT)	Name of HOT	Clone/Strain	GenBank accession number
Selenomonas noxia; S. infelix	1	HMT125	Selenomonas flueggei
		HMT126	Selenomonas sp.
		HMT130	Selenomonas noxia
		HMT138	Selenomonas sp.
		HMT139	Selenomonas dianae
		HMT146	Selenomonas sp.
		HMT479	Selenomonas sp.
		HMT481	Selenomonas sp.
		HMT639	Selenomonas infelix
		HMT726	Centipeda periodontii
		HMT892	Selenomonas sp.
		HMT919	Selenomonas sp.
		HMT920	Selenomonas sp.
		HMT936	Selenomonas sp.
		HMT937	Selenomonas sp.
Streptococcus mitis; S. oralis	2	HMT058	Streptococcus sp.
		HMT061	Streptococcus sp.
		HMT064	Streptococcus sp.
		HMT070	Streptococcus sp.
		HMT071	Streptococcus tigurinus
		HMT074	Streptococcus sp.
		HMT398	Streptococcus dentisani
		HMT423	Streptococcus sp.
		HMT431	Streptococcus sp.
		HMT638	Streptococcus infantis
		HMT677	Streptococcus mitis
		HMT707	Streptococcus oralis
		HMT728	Streptococcus peroris
		HMT734	Streptococcus pneumoniae
		HMT948	Streptococcus lactarius
Fusobacterium nucleatum	3	HMT200	Fusobacterium nucleatum subsp. vincentii
		HMT201	Fusobacterium periodonticum
		HMT202	Fusobacterium nucleatum subsp. polymorphum
		HMT203	Fusobacterium sp.
		HMT204	Fusobacterium sp.
		HMT205	Fusobacterium sp.
		HMT370	Fusobacterium sp.
		HMT420	Fusobacterium nucleatum subsp. animalis
		HMT689	Fusobacterium naviforme
		HMT698	Fusobacterium nucleatum subsp. nucleatum
Actinomyces naeslundii	4	HMT169	Actinomyces sp.
		HMT170	Actinomyces sp.
		HMT171	Actinomyces sp.
		HMT175	Actinomyces sp.
		HMT176	Actinomyces naeslundii
		HMT688	Actinomyces viscosus
		HMT849	Actinomyces johnsonii
		HMT893	Actinomyces oris
Streptococcus parasanguinis	5	HMT057	Streptococcus sp.
		HMT066	Streptococcus sp.
		HMT073	Streptococcus australis
		HMT411	Streptococcus parasanguinis II
		HMT578	Streptococcus cristatus
		HMT721	Streptococcus parasanguinis I
		HMT767	Streptococcus sinensis
		HMT886	Streptococcus oligofermentans
Veillonella dispar; V. parvula	6	HMT158	Veillonella rogosae
		HMT160	Veillonella dispar
		HMT161	Veillonella parvula
		HMT524	Veillonella atypica
		HMT887	Veillonella denticariosi
Treponema vincentii	7	HMT029	Treponema vincentii
		HMT226	Treponema sp.
		HMT228	Treponema sp.
		HMT230	Treponema sp.
		HMT231	Treponema sp.
		HMT236	Treponema sp.
		HMT237	Treponema sp.
		HMT667	Treponema medium
Porphyromonas pasteri; P. catoniae	8	HMT275	Porphyromonas sp.
		HMT277	Porphyromonas sp.
		HMT278	Porphyromonas sp.
		HMT279	Porphyromonas pasteri
		HMT283	Porphyromonas catoniae
		HMT284	Porphyromonas sp.
Actinomyces odontolyticus	9	HMT172	Actinomyces sp.
		HMT180	Actinomyces sp.
		HMT181	Actinomyces lingnae [NVP]
		HMT671	Actinomyces meyeri
		HMT701	Actinomyces odontolyticus
		HMT850	Actinomyces cardiffensis
Prevotella histicola	10	HMT298	Prevotella histicola
		HMT306	Prevotella sp.
		HMT313	Prevotella sp.
		HMT314	Prevotella sp.
		HMT469	Prevotella melaninogenica
		HMT572	Prevotella veroralis
		HMT885	Prevotella scopos
Treponema socranskii	11	HMT268	Treponema sp.
		HMT269	Treponema sp.
		HMT769	Treponema socranskii
Fretibacterium sp.	12	HMT358	Fretibacterium sp.
		HMT359	Fretibacterium sp.
		HMT360	Fretibacterium sp.
		HMT361	Fretibacterium sp.
		HMT362	Fretibacterium sp.
Aggregatibacter aphrophilus	13	HMT513	Aggregatibacter sp.
		HMT545	Aggregatibacter aphrophilus
		HMT720	Aggregatibacter paraphrophilus
		HMT898	Aggregatibacter sp.
		HMT946	Haemophilus pittmaniae
Prevotella sp.	14	HMT292	Prevotella sp.
		HMT293	Prevotella sp.
		HMT300	Prevotella sp.
Parvimonas micra	15	HMT110	Parvimonas sp.
		HMT111	Parvimonas micra
		HMT393	Parvimonas sp.
Capnocytophaga sp.	16	HMT323	Capnocytophaga sp.
		HMT324	Capnocytophaga sp.
		HMT334	Capnocytophaga sp.
		HMT335	Capnocytophaga sp.	Clone 069096_232	GB JQ454775
		HMT336	Capnocytophaga sp.	Strain F0502	GB tbd
		HMT412	Capnocytophaga sp.	Clone C2MKM106	GB AY278613
		HMT902	Capnocytophaga sp.
Selenomonas sp.	17	HMT136	Selenomonas sp.
		HMT149	Selenomonas sp.
		HMT478	Selenomonas sp.
Lactobacillus vaginalis; L. panis	18	HMT051	Lactobacillus vaginalis
		HMT709	Lactobacillus oris
		HMT818	Lactobacillus reuteri genosp. 1
		HMT882	Lactobacillus panis
		HMT938	Lactobacillus reuteri genosp. 2
Lactobacillus brevis	19	HMT418	Lactobacillus parafarraginis
		HMT424	Lactobacillus kisonensis
		HMT558	Lactobacillus brevis
		HMT881	Lactobacillus buchneri
		HMT884	Lactobacillus rapi
Selenomonas artemidis	20	HMT124	Selenomonas artemidis
		HMT133	Selenomonas sp.
		HMT137	Selenomonas sp.
Selenomonas sputigena	21	HMT134	Selenomonas sp.
		HMT151	Selenomonas sputigena
		HMT442	Selenomonas sp.
Porphyromonas endodontalis	22	HMT273	Porphyromonas endodontalis
		HMT285	Porphyromonas sp.
Haemophilus haemolyticus	23	HMT036	Haemophilus sp.
		HMT851	Haemophilus haemolyticus
		HMT908	Haemophilus sp.
Haemophilus sputorum	24	HMT035	Haemophilus paraphrohaemolyticus
		HMT944	Haemophilus sputorum
		HMT945	Haemophilus parahaemolyticus
Neisseria flava; N. mucosa	25	HMT609	Neisseria flava
		HMT649	Neisseria lactamica
		HMT682	Neisseria mucosa
		HMT729	Neisseria pharyngis
		HMT764	Neisseria sicca
Kingella denitrificans	26	HMT011	Eikenella sp.
		HMT012	Kingella sp.
		HMT582	Kingella denitrificans
Neisseria subflava	27	HMT092	Neisseria weaveri
		HMT476	Neisseria subflava
		HMT610	Neisseria flavescens
		HMT669	Neisseria meningitidis
Lachnoanaerobaculum orale	28	HMT082	Lachnoanaerobaculum orale
		HMT494	Lachnoanaerobaculum saburreum
Capnocytophaga sp.	29	HMT336	Capnocytophaga sp.	Clone X089	GB AY005080
		HMT380	Capnocytophaga sp.
		HMT412	Capnocytophaga sp.	Strain F0487	GB tbd
		HMT903	Capnocytophaga sp.
Veillonellaceae [G-1] sp.	30	HMT129	Veillonellaceae [G-1] sp.
		HMT132	Veillonellaceae [G-1] sp.
		HMT150	Veillonellaceae [G-1] sp.
Capnocytophaga sp.	31	HMT335	Capnocytophaga sp.	Clone X066	GB AY005078
		HMT336	Capnocytophaga sp.	Clone 070035 613	GB JQ462363
		HMT864	Capnocytophaga sp.
Lactobacillus acidophilus; L. crispatus	32	HMT461	Lactobacillus ultunensis
		HMT529	Lactobacillus acidophilus
		HMT817	Lactobacillus crispatus
Class Bacilli	33	HMT604	Enterococcus faecalis
		HMT801	Enterococcus casseliflavus
		HMT802	Enterococcus saccharolyticus
		HMT880	Enterococcus durans
Leptotrichia wadei	34	HMT222	Leptotrichia wadei
		HMT417	Leptotrichia sp.
		HMT463	Leptotrichia sp.
Treponema sp.	35	HMT250	Treponema sp.
		HMT251	Treponema sp.
		HMT517	Treponema sp.
		HMT951	Treponema sp.
Veillonellaceae [G-1] sp.	36	HMT135	Veillonellaceae [G-1] sp.	Clone ncd1699h10c1	GB JF140932
		HMT145	Veillonellaceae [G-1] sp.
		HMT483	Veillonellaceae [G-1] sp.
		HMT918	Veillonellaceae [G-1] sp.
Gemella morbillorum	37	HMT046	Gemella morbillorum
		HMT626	Gemella haemolysans
		HMT757	Gemella sanguinis
Peptostreptococcaceae [XI][G-7] sp.	38	HMT106	Peptostreptococcaceae [XI][G-7] [Eubacterium] yurii subsp. schtitka
		HMT377	Peptostreptococcaceae [XI][G-7] [Eubacterium] yurii
		HMT922	Peptostreptococcaceae [XI][G-7] sp.
Staphylococcus aureus; S. epidermidis	39	HMT076	Staphylococcus warneri
		HMT550	Staphylococcus aureus
		HMT567	Staphylococcus caprae
		HMT601	Staphylococcus epidermidis
Veillonellaceae [G-1] sp.	40	HMT135	Veillonellaceae [G-1] sp.	Clone DM071	GB AF287790
		HMT148	Veillonellaceae [G-1] sp.
		HMT155	Veillonellaceae [G-1] sp.
Klebsiella pneumoniae	41	HMT731	Klebsiella pneumoniae
		HMT865	Kluyvera ascorbata
Treponema maltophilum	42	HMT260	Treponema sp.
		HMT664	Treponema maltophilum
Streptococcus gordonii; S. sanguinis	43	HMT056	Streptococcus sp.
		HMT622	Streptococcus gordonii
		HMT758	Streptococcus sanguinis
Peptococcus sp.	44	HMT167	Peptococcus sp.
		HMT168	Peptococcus sp.
Actinomyces georgiae	45	HMT178	Actinomyces sp.
		HMT617	Actinomyces georgiae
		HMT877	Actinomyces sp.
Mogibacterium timidum	46	HMT042	Mogibacterium timidum
		HMT593	Mogibacterium diversum
		HMT742	Mogibacterium pumilum
Aggregatibacter segnis	47	HMT458	Aggregatibacter sp.
		HMT512	Aggregatibacter sp.
		HMT762	Aggregatibacter segnis
Rothia dentocariosa	48	HMT188	Rothia aeria
		HMT587	Rothia dentocariosa
Granulicatella adiacens	49	HMT534	Granulicatella adiacens
		HMT803	Enterococcus italicus
Treponema denticola	50	HMT584	Treponema denticola
		HMT743	Treponema putidum
Capnocytophaga granulosa	51	HMT325	Capnocytophaga granulosa
		HMT863	Capnocytophaga sp.
Lactobacillus rhamnosus	52	HMT568	Lactobacillus casei
		HMT716	Lactobacillus paracasei
		HMT749	Lactobacillus rhamnosus
Tannerella sp.	53	HMT286	Tannerella sp.
		HMT808	Tannerella sp.
		HMT916	Tannerella sp.
Streptococcus anginosus	54	HMT543	Streptococcus anginosus
		HMT576	Streptococcus constellatus
		HMT644	Streptococcus intermedius
Porphyromonas asaccharolytica	55	HMT547	Porphyromonas asaccharolytica
		HMT785	Porphyromonas uenonis
Campylobacter rectus	56	HMT748	Campylobacter rectus
		HMT763	Campylobacter showae
Alloprevotella sp.	57	HMT912	Alloprevotella sp.
		HMT913	Alloprevotella sp.
Prevotella loescheii	58	HMT472	Prevotella sp.
		HMT658	Prevotella loescheii
Haemophilus influenzae	59	HMT535	Haemophilus aegyptius
		HMT641	Haemophilus influenzae
Campylobacter concisus	60	HMT575	Campylobacter concisus
		HMT580	Campylobacter curvus
Peptostreptococcus stomatis	61	HMT112	Peptostreptococcus stomatis
		HMT542	Peptostreptococcus anaerobius
Bifidobacterium dentium	62	HMT588	Bifidobacterium dentium
		HMT862	Bifidobacterium longum
		HMT889	Bifidobacterium breve
Mycobacterium tuberculosis	63	HMT692	Mycobacterium neoaurum
		HMT822	Mycobacterium tuberculosis
		HMT823	Mycobacterium leprae
Actinomyces gerencseriae	64	HMT618	Actinomyces gerencseriae
		HMT645	Actinomyces israelii
		HMT852	Actinomyces massiliensis
Catonella morbi	65	HMT164	Catonella sp.
		HMT165	Catonella morbi
Streptococcus sobrinus	66	HMT594	Streptococcus downei
		HMT768	Streptococcus sobrinus
Neisseria gonorrhoeae	67	HMT621	Neisseria gonorrhoeae
		HMT737	Neisseria polysaccharea
Pseudomonas aeruginosa	68	HMT536	Pseudomonas aeruginosa
		HMT834	Pseudomonas otitidis
Desulfovibrio fairfieldensis	69	HMT040	Desulfovibrio sp.
		HMT605	Desulfovibrio fairfieldensis
Fusobacterium necrophorum	70	HMT690	Fusobacterium necrophorum
		HMT860	Fusobacterium gonidiaformans
Oribacterium parvum	71	HMT457	Oribacterium sinus
		HMT934	Oribacterium parvum
Parascardovia denticolens	72	HMT586	Parascardovia denticolens
		HMT642	Scardovia inopinata
Acinetobacter baumannii	73	HMT408	Acinetobacter sp.
		HMT554	Acinetobacter baumannii
Propionibacterium acnes	74	HMT193	Propionibacterium sp.
		HMT530	Propionibacterium acnes
Anaerococcus prevotii	75	HMT738	Anaerococcus prevotii
		HMT788	Anaerococcus tetradius
Leptotrichia sp.	76	HMT212	Leptotrichia sp.
		HMT217	Leptotrichia sp.
Leptotrichia hongkongensis	77	HMT213	Leptotrichia hongkongensis
		HMT879	Leptotrichia sp.
TM7 [G-1] sp.	78	HMT346	TM7 [G-1] sp.
		HMT869	TM7 [G-1] sp.
Achromobacter xylosoxidans	79	HMT343	Achromobacter xylosoxidans
		HMT828	Bordetella pertussis
Streptococcus vestibularis; S. salivarius	80	HMT021	Streptococcus vestibularis
		HMT755	Streptococcus salivarius
Treponema sp.	81	HMT235	Treponema sp.
		HMT242	Treponema sp.
Alloprevotella sp.	82	HMT308	Alloprevotella sp.
		HMT914	Alloprevotella sp.
Treponema sp.	83	HMT246	Treponema sp.
		HMT247	Treponema sp.
Mogibacterium neglectum	84	HMT008	Mogibacterium vescum
		HMT691	Mogibacterium neglectum
Erythromicrobium ramosum	85	HMT007	Porphyrobacter tepidarius
		HMT747	Erythromicrobium ramosum
Bergeyella sp.	86	HMT900	Bergeyella sp.
		HMT907	Bergeyella sp.
Enterobacter cancerogenus	87	HMT565	Enterobacter cancerogenus
		HMT634	Enterobacter hormaechei
Lactobacillus johnsonii	88	HMT615	Lactobacillus gasseri
		HMT819	Lactobacillus johnsonii
Mycoplasma pneumoniae	89	HMT616	Mycoplasma genitalium
		HMT732	Mycoplasma pneumoniae
Lachnospiraceae [G-7] sp.	90	HMT086	Lachnospiraceae [G-7] sp.
		HMT163	Lachnospiraceae [G-7] sp.
Treponema sp.	91	HMT263	Treponema sp.
		HMT264	Treponema sp.
Gemella bergeri	92	HMT555	Gemella bergeri
		HMT928	Gemella sp.
Peptostreptococcaceae [XI][G-4] sp.	93	HMT103	Peptostreptococcaceae [XI][G-4] sp.
		HMT369	Peptostreptococcaceae [XI][G-4] sp.
Peptostreptococcaceae [XI][G-1] infirmum	94	HMT105	Peptostreptococcaceae [XI][G-1] [Eubacterium] infirmum
		HMT467	Peptostreptococcaceae [XI][G-1] [Eubacterium] sulci
Corynebacterium tuscaniense	95	HMT184	Corynebacterium tuscaniense
		HMT835	Corynebacterium mucifaciens
Microbacterium flavescens	96	HMT185	Microbacterium ginsengisoli
		HMT186	Microbacterium flavescens
Stomatobaculum longum	97	HMT419	Stomatobaculum longum
		HMT910	Stomatobaculum sp.
Propionibacterium propionicum	98	HMT194	Propionibacterium sp.
		HMT739	Propionibacterium propionicum
TM7 [G-1] sp.	99	HMT352	TM7 [G-1] sp.
		HMT952	TM7 [G-1] sp.
Pedobacter sp.	100	HMT321	Pedobacter sp.
		HMT933	Pedobacter sp.
Leptotrichia hofstadii	101	HMT224	Leptotrichia hofstadii
		HMT909	Leptotrichia sp.
Bifidobacterium subtile	102	HMT890	Bifidobacterium subtile
		HMT891	Bifidobacterium scardovii
Ralstonia pickettii	103	HMT406	Ralstonia sp.
		HMT854	Ralstonia pickettii
Lactobacillus plantarum	104	HMT861	Lactobacillus plantarum
		HMT883	Lactobacillus pentosus
Neisseria sp.	105	HMT018	Neisseria sp.
		HMT499	Neisseria sp.
Mycoplasma buccale	106	HMT561	Mycoplasma buccale
		HMT606	Mycoplasma faucium
