# Supplementary material for: The Oral Microbiome in Periodontal Health
Source: Front Cell Infect Microbiol. 2021 Mar 22;11:629723. doi: 10.3389/fcimb.2021.629723 (PMC8019927; doi:10.3389/fcimb.2021.629723)
Supplement: Supplementary file 5 [file Table_5.xlsx]

## Sheet: AP
		AP1	AP10	AP11	AP12	AP13	AP14	AP15	AP16	AP17	AP18	AP19	AP2	AP20	AP21	AP22	AP23	AP24	AP25	AP26	AP27	AP28	AP29	AP3	AP30	AP31	AP32	AP33	AP34	AP35	AP36	AP37	AP38	AP39	AP4	AP40	AP41	AP42	AP43	AP44	AP45	AP5	AP6	AP7	AP8	AP9
CT1	Selenomonas noxia; S. infelix	0	0	0	0	0.0801836	0	0	0.270692	0	0	0	0.124366	0.075997	0	0	0	0	0	0	0.105365	0	0	0	0	0.455052	0.342026	0	0.0513762	0.140751	0.417989	0	0	0.242047	0	0	0.300235	0.0517881	0	0	0	0	0.0867844	0	0.362224	0.154565
CT2	Streptococcus mitis; S. oralis	0	0	0	3.8697	0.265872	0.201328	0	1.04641	0	0.067412	0.129389	0	0	3.58447	0	0.0786637	0	0	27.443	0	0	0	0.0602555	8.36685	0.217537	0.369916	0	0	31.2385	0.0607038	0	0	1.62853	0	3.00599	0.131353	0.172944	0.753895	3.8458	0	0	0.762342	0.195928	0	0.374524
CT3	Fusobacterium nucleatum	15.2341	17.3356	20.4711	13.0299	20.4071	20.616	22.4193	17.6701	23.0046	6.68727	12.8699	16.4827	37.4513	34.411	25.5821	33.322	29.651	27.8763	0.739221	36.9514	22.3139	38.3864	7.34314	1.54092	24.8489	36.6299	29.1174	9.71011	13.245	24.3155	69.2929	9.76853	33.1233	17.2429	13.1392	41.0662	37.9226	14.1261	0	30.0733	15.3425	18.2867	28.1405	15.6758	26.9741
CT4	Actinomyces naeslundii	0	0	0.0542042	0.109213	0	0	0	0	0	0	0.0690074	0	0	0.737378	0	0	0	0	0.0724726	0	0	0	0	0.414748	0	0	0	0	0.324556	0	0	0	0	0	0	0	0	0	0	0	0	3.81171	0.114944	0	0.066582
CT5	Streptococcus parasanguinis	0	0	0	0.0840097	0.192019	0	0	0.961564	0	0	0	0	0	0	0	0	0	0	0.265733	0	0	0	0	1.05579	0.921943	0.143856	0	0	5.5445	0	0	0	0.477044	0	0.217826	0	0	0	0.332446	0	0	0.238232	0.0653093	0	1.2172
CT6	Veillonella dispar; V. parvula	0	0	0	12.3809	3.19046	0.0713037	0	1.32922	0.655834	0	0	1.04468	0	0.102414	0	0.157327	0	0.374681	3.90144	0	0	0	0.281193	2.23267	2.58973	0.585701	0	0	11.2919	0.0728446	0.0553546	0	0.411245	0.174995	1.7426	19.2038	0.149663	0.153135	0.921782	0	0	2.04879	0.0783712	0	0.645014
CT7	Treponema vincentii	0	0.773371	1.53579	2.07924	5.7901	5.52814	8.51999	0.961564	0.80718	0.808944	0	0.580376	0.886632	26.8323	0.28939	7.1584	0.170017	7.8683	0	8.85063	1.56516	3.0375	7.47169	0.0908206	8.06959	0.0616527	4.38621	1.61835	0.135232	0.655602	0	2.63075	6.74442	0.174995	1.82974	2.6796	0.133034	1.88474	0	0.346866	6.68374	0.667049	4.59777	10.888	0.374524
CT8	Porphyromonas pasteri; P. catoniae	0	0	0.0677553	5.1771	0.118165	0.100664	0	26.7824	0	0	0.172519	0.116075	0	0	0	0	0	0	0.567702	0.368776	0	0	0	1.1731	1.25343	6.87427	0	0	3.18761	0.182112	0.083032	0	6.06998	0	0	0.0525412	0.37582	0	0	0	0	0	0.104495	0	0.707434
CT9	Actinomyces odontolyticus	0	0	0	0.498808	0	0.0922754	0	0.0565626	0	0	0	0.348225	0	0.204827	0	0	0	0	0.0724726	0	0	0	0	0.245973	0	0.0616527	0	0	0.347739	0.0849854	0.262935	0	0.131598	0	0.348521	0.472871	0	0	0.151112	0	0	0.357348	0	0	0.863486
CT10	Prevotella histicola	0	0	0	0.414798	0.118165	0.146802	0.114853	0.0565626	0	0	0	0.812526	0	0	0	0	0	0	0	0	0	0	0	0.673586	0.243434	0.400742	0.132915	0	2.55974	0.206393	0	0	0.411245	0.0874977	0.130695	1.7864	0	0	0.18889	0	0	0.833811	0	0	1.85181
CT11	Treponema socranskii	2.74963	3.50628	3.92981	0.0840097	1.7134	2.16428	1.14853	1.58375	3.63231	4.17954	12.5363	1.16075	0.531979	0.819308	3.95499	0.0786637	11.9012	0.749362	0	1.29072	7.47143	5.31563	3.37431	0	7.52747	0.431569	3.27858	1.97798	0	1.11695	0	0.694916	1.74368	4.54988	2.48321	3.36264	0.685124	1.41355	0	2.46419	1.29497	2.28702	7.41914	6.59994	2.83667
CT12	Fretibacterium sp.	5.49926	12.0226	9.75676	0.133015	3.30863	2.13632	3.92588	0.414792	6.52471	12.7633	6.84324	0.541684	7.15217	4.5062	8.48877	0.157327	14.5081	9.24213	0	3.81069	11.1825	9.36563	11.2745	0.0807295	3.22853	0.0959042	6.36517	23.0165	0	4.312	0	6.03363	1.07472	5.83318	8.8292	0.105082	4.34909	6.67512	0	6.18577	5.29129	3.09701	10.2231	2.73444	0
CT13	Aggregatibacter aphrophilus	0	0	0	0.133015	0	3.93708	0	5.09063	0	0	0.37379	0.116075	0	0	0	0	0	0	0.744857	0	0	0	0	0	0	0	0	0	0.225386	0	0	0	0.164498	0	0	0.437843	0	0.196327	0	0	0.481786	0	0	0	0
CT14	Prevotella sp.	0	0	0	0.0630073	0	0	0	0	0.100898	0	0	0.116075	0	0	0	0	0	0	0	0	0	0	0	0	0.0621534	0	0	0	0	0	0	0	0	0	0	0	0	0	0	0	0	0	0	0	0.208069
CT15	Parvimonas micra	0	0	0	0	0	0	0	0	0.302693	0	0.711639	0	0.132995	0	0	0	0	0	0	0.276582	0.0590627	0	0	0	0.124307	0.205509	0.0553815	0	0	0.212463	0	0	0	0.116664	0	0	0.0731686	0	0	0.202338	0.309123	0.262055	0	0	0.0520172
CT16	Capnocytophaga sp.	0	0	0	0	0	0	0	0.113125	0.0504488	0	0	0.0580376	0	0	0	0	0	0	0	0	0	0	0	0	0.150204	0	0	0	0.16421	0	0	0	0.148048	0	0	0	0.0532135	0	0	0	0	0	0	0	0
CT17	Selenomonas sp.	0	0	0	0	0	0	0	0	0	0	0	0	0	0	0	0	0	0	0	0	0	0	0	0	0	0	0	0	0	0	0	0	0	0	0	0.105082	0	0	0	0	0	0	0	0	0
CT18	Lactobacillus vaginalis; L. panis	0	0	0	0	0	0	0	0	0	0	0	0	0	0	0	0	0	0	0	0	0	0	0	0	0	0	0	0	0	0	0	0	0	0	0	0	0	0	0	0	0	0	0	0	0
CT19	Lactobacillus brevis	0	0	0	0	0	0	0	0	0	0	0	0	0	0	0	0	0	0	0	0	0	0	0	0	0	0	0	0	0	0	0	0	0	0	0	0	0	0	0	0	0	0	0	0	0
CT20	Selenomonas artemidis	0	0	0	0	0	0	0	0	0	0	0	0	0	0	0	0	0	0	0	0	0	0	0	0	0.28561	0	0	0	0	0	0	0	0	0	0	0	0	0	0	0	0	0	0	0	0.114438
CT21	Selenomonas sputigena	0	0	0	0	0	0	0.125294	0.0565626	0.151346	0.067412	0	0.174113	0	0	0	0	0	0	0	0.092194	0.10336	0.0949219	0.0602555	0	0.150204	0	0	0.0899084	0	0	0	0	0	0.0583318	0.0871302	0.551683	0	0	0	0	0	0.238232	0	0.801687	0.124841
CT22	Porphyromonas endodontalis	0	0.204716	1.19701	7.27734	5.25835	16.1188	1.10676	0.0565626	0.605385	1.88754	0.474426	16.3666	0.842301	1.63862	0.28939	0.0786637	1.0201	6.9316	0.157024	4.97848	0.132891	3.08496	7.75288	0.264894	7.32375	0.133581	6.77869	0.0899084	0.0965941	5.28123	0	0.496368	0.641542	0	8.23381	2.15419	0.259416	12.8044	0	0.256536	12.3315	1.73909	3.21322	16.0524	0.166455
CT23	Haemophilus haemolyticus	0	0	0	0	0	0	0	0	0	0	0	0	0	0	0	0	0	0	0.0926039	0	0	0	0	0	0	0	0	0	0.270464	0	0	0	0	0	0	0.0875687	0	0	0	0	0	0	0	0	0
CT24	Haemophilus sputorum	0	0.0859301	0	0	0	0	0	0	0	0	0	0	0	0	0	0	0	0	0.0805251	0	0	0	0	0	0	0	0	0	0.476531	0	0	0	0	0	0	0	0	0	0.654818	0	0	0	0	0	0
CT25	Neisseria flava; N. mucosa	14.0699	0	0.0677553	0.273032	0	4.35792	0	3.4786	0.100898	0	0	7.2547	0	0	0	38.2306	0	0	0.471072	0	0	0	0	4.92702	0	0	0	0	0.16421	0	0	0	0	0	0	0.42033	0	0	44.1322	0	0	1.20307	0	0.633892	0.0624207
CT26	Kingella denitrificans	0.146257	0	0	0	0	0	0	0.169688	0	0	0	0.812526	0	0	0	0	0	0	0.10267	0	0	0	0	0	0	0	0	0	0	0	0	0	0.0986988	0	0	0	0	0	0	0	0	0	0	0	0.145648
CT27	Neisseria subflava	0.438771	0.214825	0	0.729834	0	0.113247	0.146176	0.424219	0	0.067412	0	0.4643	0	0	0	0	0	0	0.169103	2.12046	0	0	0	9.74808	0	0.318539	0	0.179817	0.270464	0	0	0	0.246747	0	0	0.0788118	0	0	0.143556	0	0	0.166762	0	0.279658	0.759451
CT28	Lachnoanaerobaculum orale	0	0	0	0	0	0	0	0	0	0	0	0	0	0	0	0	0	0	0	0	0	0	0	0	0	0	0	0	0	0	0	0	0	0	0	0	0	0	0	0	0	0	0	0	0
CT29	Capnocytophaga sp.	0	0	0	0	0	0	0	0.169688	0	0	0	0	0	0	0	0	0	0	0.0603938	0	0	0	0	0	0	0	0	0	0	0	0	0	0	0	0	0.210165	0	0	0	0	0	0	0	0	0
CT30	Veillonellaceae [G-1] sp.	0	0	0	0	0	0	0	0	0.100898	0	0	0.0580376	0	0	0	0	0	0	0	0	0	0	0	0	0	0	0	0	0	0.0667742	0	0	0	0	0	0.0525412	0	0	0	0	0	0	0	0.0559317	0.0728241
CT31	Capnocytophaga sp.	0	0	0	0	0	0	0	0.0565626	0	0	0.0646945	1.10271	0	0	0	0	0	0	0	0	0	0	0	0	0	0	0	0	0	0	0	0	0.230297	0	0	0	0	0	0	0	0	0	0	0	0
CT32	Lactobacillus acidophilus; L. crispatus	0	0	0	0	0	0	0	0	0	0	0	0	0	0	0	0	0	0	0	0	0	0	0	0	0	0	0	0	0	0	0	0	0	0	0	0	0	0	0	0	0	0	0	0	0
CT33	Class Bacilli	0	0	0	0	0	0	0	0	0	0	0	0	0	0	0	0	0	0	0	0	0	0	0	0	0	0	0	0	0	0	0	0	0	0	0	0	0	0	0	0	0	0	0	0	0
CT34	Leptotrichia wadei	0	0	0	0	0	0	0	0	0	0	0	0	0	0	0	0	0	0	0	0	0	0	0	0	0.0911584	0	0	0	0.0618202	0.286522	0	0	0.276357	0	0	0.0630494	0	0	0	0	0	0	0	0	0
CT35	Treponema sp.	0	0	0	0.168019	1.77248	0.419434	0.689117	0	0	0	0	0	0	0	0	0.157327	0	0	0	0.184388	0	0	0.441874	0	0.331485	0	0.0886103	0.179817	0	0	0	0.215093	0	0	0.522781	0	0	0.235592	0	0	0.342542	0	0	0.522029	0
CT36	Veillonellaceae [G-1] sp.	0.175508	0	0	0	0	0	0	0	0.0504488	0.202236	0	0	0	0	0	0	0	0	0	0	0	0.0949219	0	0	0.269332	0	0	0.0899084	0	0	0	0	0	0	0	0	0	0	0	0	0.0710147	0	0	0.0932195	0
CT37	Gemella morbillorum	0	0	0	1.19189	0	0.134219	0	0.0848438	0	0.067412	0	0.0580376	0	0.102414	0	0	0	0	1.69103	0.184388	0	0	0	0.427614	0.403997	0.287713	0	0	0.792072	0.0607038	0	0	1.23374	0	0	0.0525412	0	0	0	0	0	0.178674	0	0	0.124841
CT38	Peptostreptococcaceae [XI][G-7] sp.	0	0	0	0	0	0.0922754	0	0	0	0	0	0.0580376	0	0	0	0	0	0	0	0.092194	0	0	0	0	0.129486	0	0	0	0	0.127478	0	0	0.394795	0	0	0	0	0	0	0	0	0	0	0	0
CT39	Staphylococcus aureus; S. epidermidis	0	0	0	0	0	0	0	0	0	0	0	0	0	0	0	0	0	0	0	0	0	0	0	0	0	0	0	0	0	0	0	0	0	0	0	0	0	0	0	0	0	0	0	0	0
CT40	Veillonellaceae [G-1] sp.	0	0	0	0	0	0	0	0	0	0	0	0	0	0	0	0	0	0	0	0	0.118125	0.0949219	0	0	0	0	0	0	0	0	0	0	0	0	0	0.105082	0	0	0	0	0.0835467	0	0	0	0
CT41	Klebsiella pneumoniae	0	0	0	0	0	0	0	0	0	0	0	0	0	0	0	0	0	0	0	0	0	0	0	0	0	0	0	0	0	0	0	0	0	0	0	0	0	0	0	0	0	0.56495	0	0	0
CT42	Treponema maltophilum	4.06594	3.1415	2.7328	0	0.590826	0.339741	0.803969	0	0.605385	3.70766	0.0646945	0.116075	0.26599	0	0	0	1.36014	0.374681	0	0.184388	0.9893	4.31895	0.803407	0	1.11358	0.0513772	1.0744	0.899084	0	1.01375	0	0.703189	0.148048	4.60821	0.740607	0.183894	0.292674	0.341609	0	1.87886	0.497103	2.14409	2.37726	1.9949	0.343314
CT43	Streptococcus gordonii; S. sanguinis	0	0	0	1.57518	0.147707	0.188745	0	0.4525	0.0504488	0	0.0862593	0	0	0.409654	0	0.353987	0	0	8.21356	0	0	0	0	9.96757	0	0	0	0	5.62178	0	0	0	0.394795	0	0.479216	0.131353	0	0.106017	27.8272	0	0	0.547933	0	0	0.63461
CT44	Peptococcus sp.	0	0	0	0	0	0	0	0	0	0	0	0.0872745	0	0	0	0	0	0	0	0.532677	0	0	0	0	0	0.0621094	0	0	0	0.0803989	0	0	0	0	0	0	0	0	0	0	0	0	0	0	0
CT45	Actinomyces georgiae	0	0	0	0	0	0	0	0	0	0	0	0	0	0	0	0	0	0	0	0	0	0	0	0	0	0	0	0	0	0	0	0	0	0	0	0	0	0	0	0	0	0.111175	0	0	0.0970988
CT46	Mogibacterium timidum	0	0	0	0	0	0	0	0	0	0.202961	0	0.124812	0	0	0	0	0	0.0805766	0	0	0	0	0	0	0	0	0	0	0	0	0	0	0	0	0	0	0	0	0	0	0	0.190393	0.073034	0	0
CT47	Aggregatibacter segnis	0	0	0	0	0	0	0	1.60261	0	0	0.0575062	0	0	0	0	0	0	0	0	0	0	0	0	0	0	0	0	0.0599389	0.920864	0	0	0	0	0	0	0	0	0	0	0	0	0	0	0	0.208069
CT48	Rothia dentocariosa	0.702033	0	0	7.23184	0	0	0	0.188542	0.201795	0	0	0	0	0	0	0	0	0	1.6105	0	0	0	0	3.18377	0	0	0	0	0	0	0	0	0	0	0.0580868	0	0	0	0.362668	0	0	5.51109	0	0.124293	0.0693563
CT49	Granulicatella adiacens	0	0	0	0.816294	0	0	0	0.116896	0	0	0	0	0	0.0682757	0	0	0	0	0.895439	0	0	0	0	0.797708	0	0	0	0	0.104322	0	0	0	0.0899256	0	0.17426	0	0	0.0785308	0.522847	0	0	0.0794106	0	0	0.0624207
CT50	Treponema denticola	1.75508	9.19452	2.34885	0.34654	11.1666	4.20272	2.73558	0.113125	2.72423	10.2466	0	1.04468	15.2501	2.66275	11.5756	0.943965	9.35095	9.36703	0	8.66624	15.0019	4.36641	10.1631	0	4.17464	4.78836	5.1394	10.6092	0.0579565	9.83402	0	11.6977	9.14609	0	3.39808	0.105082	0.219506	5.11235	0	1.6982	4.2024	0.881457	3.84019	2.61015	9.61278
CT51	Capnocytophaga granulosa	0	0	0	0	0	1.68473	0	1.64031	0	0	0.129389	0	0	0	0	0	0	0	0.744857	0	0	0	0	0	0.119127	0	0	0	0.222167	0	0	0	1.97398	0	0	0	0.114187	0	0	0	0	0	0	0	4.20646
CT52	Lactobacillus rhamnosus	0	0	0	0	0	0	0	0	0	0	0	0	0	0	0	0	0	0	0	0	0	0	0	0	0	0	0	0	0	0	0	0	0	0	0	0	0	0	0	0	0	0	0	0	0
CT53	Tannerella sp.	0	0	0	0	0	0.0838867	0	0.282813	0.100898	0	0	0.580376	0	0	0	0	0	0	0	0	0	0	0	0	0.486869	0	0	0	1.08185	1.67543	0	0	0.361896	0	0.0871302	0.105082	0	0	0	0	0	0.119116	0.0783712	0	0.33291
CT54	Streptococcus anginosus	0	0	0	1.73795	0.90101	0.117441	0	0.22625	0.353141	0	0.258778	0.174113	0	0.102414	0	0.117996	0	0	0.567702	0	0	0	0	0.181641	0	0.637078	0	0	0.0869347	0	0	0	0.0986988	0.145829	0.348521	2.46944	0	0.0824573	0	0	0.06266	0.214409	0	0	0.395331
CT55	Porphyromonas asaccharolytica	0	0	0	0	0	0	0	0	0	0	0	0	0	0	0	0	0	0	0	0	0	0	0	0	0	0	0	0	0	0	0	0	0	0	0	0	0	0	0	0	0	0	0	0	0
CT56	Campylobacter rectus	2.80813	0.744727	2.55964	0.140016	4.82508	4.75917	1.82372	0.603334	2.48881	0.179765	1.61017	0.309534	1.30039	0.819308	0.192926	0	0.680069	0	0	0.122925	0	0.50625	1.15155	0.0555015	0.25552	0.150707	0.177221	0	0.206067	0.890323	0	3.61797	0.592193	0.622206	4.64695	0.595467	0	1.96327	0	0.404677	4.08265	1.47704	3.57024	2.56043	0.887761
CT57	Alloprevotella sp.	0	0	0	0	0	0	0	0	0	0	0	0	0	0	0	0	0	0.374681	0	0	0	0	0	0	0	0	0	0	0	0	0	0	0	0	0	0	0	0	0	0	0	0	0	0	0
CT58	Prevotella loescheii	0	0	0	0	0	0	0	0.203625	0	0	0.120763	0.23215	0	0	0	0	0	0	0	0	0	0	0	0	0	0	0	0	1.9937	0.339942	0	0	0.460595	0	0	0	0	0	0	0	0	0	0	0	0.14981
CT59	Haemophilus influenzae	0	0	0	0	0	0	0	0	0	0	0	0	0	0	0	0	0	0	0	0	0	0	0	0	0	0	0	0	0	0	0	0	0	0	0	0	0	0	0	0	0	0	0	0	0
CT60	Campylobacter concisus	0	0	0	0	0	0	0	0.377084	0	0	0.0575062	0	0	0	0	0	0	0	0	0	0	0	0	0	0	0.068503	0	0	0	0	0	0	0.0877323	0	0	0.105082	0.0842547	0	0	0	0	0.142939	0	0	0
CT61	Peptostreptococcus stomatis	0	0	0	0	0	0	0	0	0.0599391	0.0800935	0	0	0	0	0	0	0	0	0	0	0	0	0	0	0	0	0	0	0	0	0	0	0	0	0	0	0	0	0	0	0	0.0943492	0	0	0
CT62	Bifidobacterium dentium	0	0	0	0	0	0	0	0	0	0	0	0	0	0	0	0	0	0	0	0	0	0	0	0	0	0	0	0	0	0	0	0	0	0	0	0	0	0	0	0	0	0	0	0	0
CT63	Mycobacterium tuberculosis	0	0	0	0	0	0	0	0	0	0	0	0	0	0	0	0	0	0	0	0	0	0	0	0	0	0	0	0	0	0	0	0	0	0	0	0	0	0	0	0	0	0	0	0	0
CT64	Actinomyces gerencseriae	0	0	0	0	0	0	0	0.154734	0	0	0	0.560363	0	0	0	0	0.117253	0	0.175933	0	0	0	0	0.414017	0	0	0	0	0.0790518	0	0	0	0	0	0	0	0	0	0	0.0980128	0	0.208768	0.268444	0	0.184631
CT65	Catonella morbi	0	0	0.062109	0	0.0812386	0	0	0	0	0	0	0	0	0	0	0	0	0	0	0	0	0	0	0	0	0	0	0	0	0	0	0	0	0.0874977	0	0	0	0	0	0	0	0	0	0.279658	0
CT66	Streptococcus sobrinus	0	0	0	0	0	0	0	0	0	0	0	0	0	0	0	0	0	0	0	0	0	0	0	0	0	0	0	0	0	0	0	0	0	0	0	0	0	0	0	0	0	0	0	0	0
CT67	Neisseria gonorrhoeae	0	0	0	0	0	0	0	0	0	0	0	0	0	0	0	0	0	0	0	0	0	0	0	0	0	0	0	0	0	0	0	0	0	0	0	0	0	0	0	0	0	0	0	0	0
CT68	Pseudomonas aeruginosa	0	0	0	0	0	0	0	0	0	0	0	0	0	0	0	0	0	0	0	0	0	0	0	0	0	0	0	0	0	0	0	0	0	0	0	0	0	0	0	0	0	0	0	0	0
CT69	Desulfovibrio fairfieldensis	0	0	0	0	0	0	0	0	0	0	0	0	0	0	0	0	0	0	0	0	0	0	0	0	4.93243	0	0	0.138321	0	0	0	0	0	0	0	0	0	0	0	0	0	0	0	0	0
CT70	Fusobacterium necrophorum	0	0	0	0	0	0	0	0	3.75339	0	0	0	0	0	0	0	0	0	0	0	0	0	0	0	0.066297	0	0	0	0	0	0	0	0	0	0	0	0	0	0	0	0	0	0	0	0
CT71	Oribacterium parvum	0	0	0	0	0	0	0	0	0	0	0	0	0	0	0	0	0	0	0	0	0	0	0	0	0	0	0	0	0	0	0	0	0	0	0	0	0	0	0	0	0	0	0	0	0
CT72	Parascardovia denticolens	0	0	0	0	0	0	0	0	0	0	0	0	0	0	0	0	0	0	0	0	0	0	0	0	0	0	0	0	0	0	0	0	0	0	0	0	0	0	0	0	0	0	0	0	0
CT73	Acinetobacter baumannii	0	0	0	0	0	0	0	0	0	0	0	0	0	0	0	0	0	0	0	0	0	0	0	0	0	0	0	0	0	0	0	0	0	0	0	0	0	0	0	0	0	0.328596	0	0	0
CT74	Propionibacterium acnes	0	0	0	0	0	0	0	0	0	0	0	0	0.061147	0	0	0	0	0	0	0	0	0	0	0	0	0	0	0	0	0	0	0	0	0	0	0	0	0	0	0	0	0.246447	0	0	0
CT75	Anaerococcus prevotii	0	0	0	0	0	0	0	0	0	0	0	0	0	0	0	0	0	0	0	0	0	0	0	0	0	0	0	0	0	0	0	0	0	0	0	0	0	0	0	0	0	0	0	0	0
CT76	Leptotrichia sp.	0	0	0	0.26043	0	0	0	0.791876	0	0	0	0	0	0	0	0	0	0	0	0	0	0	0	0	0	0	0	0	0.664568	0	0	0	0.671152	0	0	0	0	0	0	0	0	0	0.0522474	0	0.066582
CT77	Leptotrichia hongkongensis	0	0	0	0	0	0.184551	0.0668234	0	0.080718	0	0	0	0	0	0	0	0	0	3.19363	0	0	0	0	0	0.269332	0	0	0	0.177733	0.189396	0	0	0.131598	0	0.139408	0.252198	0.0558742	0.763319	0	0	0	0.323995	0	0	0
CT78	TM7 [G-1] sp.	0	0	0	0	0	0	0	0	0	0	0	0	0	0	0	0	0	0	0	0	0	0	0	0	0	0	0	0	0	0	0	0	0	0	0	0	0	0	0	0	0	0	0	0	0
CT79	Achromobacter xylosoxidans	0	0	0	0	0	0	0	0	0	0	0	0	0	0	0	0	0	0	0	0	0	0	0	0	0	0	0	0	0	0	0	0	0	0	0	0	0	0	0	0	0	0	0	0	0
CT80	Streptococcus vestibularis; S. salivarius	0	0	0	0.0560065	0	0	0	0	0	0	0	0	0	0	0	0	0	0	0.330153	0	0	0	0	0	0.0690594	0	0	0	0.457212	0	0	0	0	0	0	0	0	0	0	0	0	0.420876	0	0	0
CT81	Treponema sp.	0	0	0	0	0.0886239	0.134219	0	0	0	0	0	0	0	0	0	0	0	0	0	0.92194	0	0	0.0803407	0	0.352203	0	0	0.179817	0	0	0	1.27401	0	0	0.609912	0	0	0.541862	0	0.0505846	0	0	0.0522474	0.298302	0
CT82	Alloprevotella sp.	0	0	0	0.0756087	0	0	0	0	0	0	0	0	0	0	0	0	0	0	0	0	0	0	0	0	0	0.228996	0	0	0	0	0	0	0	0	0	0	0	0	0	0	0	0	0	0	0
CT83	Treponema sp.	0	0	5.08165	0	0.0886239	0	0	0	0	0	0	0	0.0886632	0	0	0	0	3.74681	0	2.76582	0.0590627	0	0.642726	0.105957	0.0517945	0	0	2.69725	0	1.08053	0	9.08354	0.164498	0	15.6834	0.42033	0	15.0779	0	0	0	0	0	0	0
CT84	Mogibacterium neglectum	0	0	0	0	0	0	0	0	0	0	0	0	0	0	0	0	0	0	0	0	0	0	0	0	0	0	0	0	0	0	0	0	0	0	0	0	0	0	0	0	0	0	0	0	0
CT85	Erythromicrobium ramosum	0	0	0	0	0	0	0	0	0	0	0	0	0	0	0	0	0	0	0	0	0	0	0	0	0	0	0	0	0	0	0	0	0	0	0	0	0	0	0	0	0	0	0	0	0
CT86	Bergeyella sp.	0	0	0	0	0	0	0	0.0754167	0	0	0	0.0773834	0	0	0	0	0	0	0	0	0	0	0	0	0	0	0	0	0	0	0	0	0	0	0	0	0	0	0	0	0	0	0	0	0
CT87	Enterobacter cancerogenus	0	0	0	0	0	0	0	0	0	0	0	0	0	0	0	0	0	0	0	0	0	0	0.120511	0	0	0	0	0	0	0	0	0	0	0	0	0	0	0	0	0	0	0	0	0	0
CT88	Lactobacillus johnsonii	0	0	0	0	0	0	0	0	0	0	0	0	0	0	0	0	0	0	0	0	0	0	0	0	0	0	0	0	0	0	0	0	0	0	0	0	0	0	0	0	0	0	0	0	0
CT90	Lachnospiraceae [G-7] sp.	0	0	0	0	0	0	0	0	0	0	0	0	0	0	0	0	0	0	0	0	0	0	0	0	0	0	0	0	0	0	0	0	0	0	0	0	0	0	0	0	0	0	0	0	0
CT91	Treponema sp.	0	0	0	0	0.90101	0	0	0	0	0	0	0	0	0	0	0	0	0	0	0	0	0	0	0	0	0	0	1.0789	0	0	0	0.26473	0	0	0.609912	0	0	0.376948	0	0	0	0	0	0	0
CT92	Gemella bergeri	0	0	0	0	0	0	0	0	0	0	0	0	0	0	0	0	0	0	0	0	0	0	0	0	0	0	0	0	0	0	0	0	0	0	0	0	0	0	0	0	0	0	0	0	0
CT93	Peptostreptococcaceae [XI][G-4] sp.	0	0	0.0790478	0	0	0	0	0	0.0504488	0.101118	0	0	0	0.0512068	0.0723474	0	0.170017	0.0936703	0	0	0.0590627	0.0949219	0.170724	0	0.0647432	0	0.182759	0.179817	0	0.0607038	0	0	0	0	0	0	0.0831461	0	0	0	0.112788	0.160806	0.228583	0	0
CT94	Peptostreptococcaceae [XI][G-1] infirmum	0	0	0	0	0	0	0	0	0	0	0	0	0	0	0	0	0	0	0	0	0	0	0	0	0	0	0	0	0	0	0	0	0	0	0	0	0	0	0	0	0	0	0	0	0
CT95	Corynebacterium tuscaniense	0	0	0	0	0	0	0	0	0	0	0	0	0	0	0	0	0	0	0	0	0	0	0	0	0	0	0	0	0	0	0	0	0	0	0	0	0	0	0	0	0	0.0952927	0	0	0
CT96	Microbacterium flavescens	0	0	0	0	0	0	0	0	0	0	0	0	0	0	0	0	0	0	0	0	0	0	0	0	0	0	0	0	0	0	0	0	0	0	0	0	0	0	0	0	0	0	0	0	0
CT97	Stomatobaculum longum	0	0	0	0	0	0	0	0	0	0	0	0	0	0	0	0	0	0	0	0	0	0	0	0	0.0621534	0	0	0	0	0	0	0	0	0	0	0.105082	0	0	0	0	0	0.190585	0	0	0
CT98	Propionibacterium propionicum	0	0	0	0.336039	0	0.050332	0	0	0	0	0.388167	0.23215	0	0	0	0	0	0	1.92052	0	0	0	0	44.5097	0.403997	0	0	0	0	0	0	0	0	0	0	0	0	0	0	0	0	0.738518	0	0.0745756	0
CT99	TM7 [G-1] sp.	0.117006	0	0	0	0	0	0	0	0	0	0	0	0	0	0	0	0	0	0	0	0	0	0	0	0	0	0	0	0	0	0	0	0	0	0	0	0	0	0	0	0	0.0952927	0	0	0
CT100	Pedobacter sp.	0	0	0	0	0	0	0	0	0	0	0	0	0	0.136551	0	0	0	0	0	0	0	0	0	0	0	0	0	0	0.16743	0	0	0	0	8.16645	0	0	0	0	0	0	0	0	0	0	0
CT101	Leptotrichia hofstadii	0	0	0	0	0	0	0	0.113125	0	0	0	0.37144	0	0	0	0	0	0	0.458993	0.14751	0	0	0	0	1.0276	0	0	0	0.664568	0	0	0	0.210558	0	0	0	0	0	0	0	0	0.0571756	0	0	0.133164
CT102	Bifidobacterium subtile	0	0	0	0	0	0	0	0	0	0	0	0	0	0	0	0	0	0	0	0	0	0	0	0	0	0	0	0	0	0	0	0	0	0	0	0	0	0	0	0	0	0	0	0	0
CT103	Ralstonia pickettii	0	0	0	0	0	0	0	0	0	0	0	0	0	0	0	0	0	0	0	0	0	0	0	0	0	0	0	0	0	0	0	0	0	0	0	0	0	0	0	0	0	0	0	0	0
CT104	Lactobacillus plantarum	0	0	0	0	0	0	0	0	0	0	0	0	0	0	0	0	0	0	0	0	0	0	0	0	0	0	0	0	0	0	0	0	0	0	0	0	0	0	0	0	0	0	0	0	0
CT105	Neisseria sp.	0	0	0	0	0	0	0	0.197969	0.0504488	0	0	0	0	0.409654	0	0	0	0	0	0.092194	0	0	0	0	0.103589	0	0	0	0	0	0	0	0	0	0	0	0	0	0	0	0	0	0	0	0
CT106	Mycoplasma buccale	0	0.222407	2.84572	0	0.236331	0.134219	4.05117	0	0	2.15718	0.776334	1.8572	0.177326	0	0	0	0	0	0	0	0.531564	0.379688	1.84784	0	0.103589	0	0	0	0	0	0	0	0	2.09994	0	0	0	0	0	4.01786	1.95499	0	0.0522474	1.49151	0
HMT1	Bartonella schoenbuchensis	0	0	0	0	0	0	0	0	0	0	0	0	0	0	0	0	0	0	0	0	0	0	0	0	0	0	0	0	0	0	0	0	0	0	0	0	0	0	0	0	0	0	0	0	0
HMT2	Caulobacter sp.	0	0	0	0	0	0	0	0	0	0	0	0	0	0	0	0	0	0	0	0	0	0	0	0	0	0	0	0	0	0	0	0	0	0	0	0	0	0	0	0	0	0	0	0	0
HMT3	Sphingomonas echinoides	0	0	0	0	0	0	0	0	0	0	0	0	0	0	0	0	0	0	0	0	0	0	0	0	0	0	0	0	0.0772753	0	0	0	0	0	0	0	0	0	0	0	0	0	0	0	0
HMT4	Sphingomonas sp.	0	0	0	0	0	0	0	0	0	0	0	0	0	0	0	0	0	0	0	0	0	0	0	0	0	0	0	0	0.0579565	0	0	0	0	0	0	0	0	0	0	0	0	0	0	0	0
HMT5	Sphingomonas sp.	0	0	0	0	0	0	0	0	0	0	0	0	0	0	0	0	0	0	0	0	0	0	0	0	0	0	0	0	0	0	0	0	0	0	0	0	0	0	0	0	0	0	0	0	0
HMT6	Sphingomonas sp.	0	0	0	0	0	0	0	0	0	0	0	0	0	0	0	0	0	0	0	0	0	0	0	0	0	0	0	0	0	0	0	0	0	0	0	0	0	0	0	0	0	0	0	0	0
HMT13	Neisseria bacilliformis	0	0	0	0	0	0	0	0	0	0	0	0.0580376	0	0.102414	0	0	0	0	0.0664332	0	0	0	0	0	0	0	0	0	0	0	0	0	0	0	0	0	0	0	0	0	0	0	0	0	0.676224
HMT14	Neisseria oralis	0	0	0	4.30025	0	0.331353	0	0.905001	0	0	0.560685	1.62505	0	0	0	0	0	0	35.1492	0	0	0	0	4.84377	0.673329	0	0	0	0.0772753	0	0.083032	0	0.0657992	0	0	0	0	0	0	0	0	0	0	0.372878	0
HMT20	Neisseria sp.	0	0	0	0	0	0	0	0	0	0	0	0	0	0	0	0	0	0	0	0	0	0	0	0	0	0	0	0	0	0	0	0	0	0	0	0	0	0	0	0	0	0	0	0	0
HMT22	Lautropia mirabilis	1.28706	0	0.0752836	1.92522	0	0.956309	0	0.4525	0.336325	0	0.115012	0.386917	0	0	0	0	0	0	0	0	0	0	0	0.232097	0.0621534	0	0	0	2.93646	0	0	0	0	0	0	0	0	0	2.0249	0	0	0.127057	0	0.273444	0
HMT23	Delftia acidovorans	0	0	0	0	0	0	0	0	0	0	0	0	0	0	0	0	0	0	0	0	0	0	0	0	0	0.0739832	0	0	0	0	0	0	0	0	0	0	0	0	0	0	0	0.13341	0	0	0
HMT24	Schlegelella thermodepolymerans	0	0	0	0	0	0	0	0	0	0	0	0	0	0	0	0	0	0	0	0	0	0	0	0	0	0	0	0	0	0	0	0	0	0	0	0	0	0	0	0	0	0	0	0	0
HMT25	Leptothrix sp.	0	0	0	0	0	0	0	0	0	0	0	0	0	0	0	0	0	0	0	0	0	0	0	0	0	0	0	0	0	0	0	0	0	0	0	0	0	0	0	0	0	0	0	0	0
HMT26	Schlegelella aquatica	0	0	0	0	0	0	0	0	0	0	0	0	0	0	0	0	0	0	0	0	0	0	0	0	0	0	0	0	0	0	0	0	0	0	0	0	0	0	0	0	0	0	0	0	0
HMT27	Cupriavidus gilardii	0	0	0	0	0	0	0	0	0	0	0	0	0	0	0	0	0	0	0	0	0	0	0	0	0	0	0	0	0	0	0	0	0	0	0	0	0	0	0	0	0	0	0	0	0
HMT28	Rhodocyclus sp.	0	0	0	0	0	0	0	0	0	0	0	0.696451	0	0	0	0	0	0	0	0	0	0	0	0	0	0	0	0	0	0	0	0	0	0	0	0	0	0	0	0	0	0	0	0	0
HMT32	Pseudomonas sp.	0	0	0	0	0	0	0	0	0	0	0	0	0	0	0	0	0	0	0	0	0	0	0	0	0	0	0	0	0	0	0	0	0	0	0	0	0	0	0	0	0	0	0	0	0
HMT37	Stenotrophomonas nitritireducens	0	0	0	0	0	0	0	0	0	0	0	0	0	0	0	0	0	0	0.0905907	0	0	0	0	0.147584	0.0517945	0.729557	0	0	0.83071	0	0	0	0	0	0	0	0	0	0	0	0	3.25186	0.0653093	0	0
HMT38	Olsenella uli	0	0	0	0	0	0	0	0	0	0	0	0	0	0	0	0	0	0	0	0	0	0	0	0	0	0	0	0	0	0	0	0	0	0	0	0	0	0	0	0	0	0	0	0	0
HMT39	Bdellovibrio sp.	0	0	0	0	0	0	0	0	0	0	0	0	0	0	0	0	0	0	0	0	0	0	0	0	0	0	0	0	0	0	0	0	0	0	0	0	0	0	0	0	0	0	0	0	0
HMT41	Desulfobulbus sp.	2.28161	2.54757	1.40028	0	0	0.150996	0.522058	0.113125	0.302693	0.808944	1.55267	0	0.797969	0.409654	0	0	0.170017	1.12404	0	0	1.89001	1.89844	1.28545	0	0	0	0.930408	1.43853	0	1.62686	0	0	0.230297	0.583318	0	0	2.88018	0	0	1.61871	0	2.8826	0	0.261015	0
HMT44	Campylobacter sp.	0	0	0	0	0	0	0	0	0	0	0	0	0	0	0	0	0	0	0	0	0	0	0.0535605	0	0	0	0	0	0	0	0	0	0	0	0	0	0	0	0	0	0	0	0	0	0
HMT45	Bacillus clausii	0	0	0	0	0	0	0	0	0	0	0	0	0	0	0	0	0	0	0	0	0	0	0	0	0	0	0	0	0	0	0	0	0	0	0	0	0	0	0	0	0	0	0	0	0
HMT48	Paenibacillus sp.	0	0	0	0	0	0	0	0	0	0	0	0	0	0	0	0	0	0	0	0	0	0	0	0	0	0	0	0	0	0	0	0	0	0	0	0	0	0	0	0	0	0	0	0	0
HMT75	Ruminococcaceae [G-1] sp.	0	0	0	0	0	0	0	0	0	0	0	0	0	0	0	0	0	0	0	0	0	0	0	0	0	0	0	0	0	0	0	0	0	0	0	0	0	0	0	0	0	0	0	0	0
HMT78	Oribacterium sp.	0	0	0.135511	0	0	0	0	0	0	0	0.0862593	1.3929	0	0	0	0	0	0	0	0	0	0	0	0	0	0	0	0	0	0.194252	0	0	0	0	0	0	0.11973	0	0	0	0	0.238232	0	0	0
HMT80	Butyrivibrio sp.	0	0	0	0	0	0	0	0	0	0	0	0	0	0	0.0964632	0	0	0	0	0	0	0	0	0	0	0	0	0	0	0.05261	0	0	0	0	0	0	0	0	0	0	0	0	0	0	0
HMT81	Peptostreptococcaceae [XI][G-7] sp.	0	0	0	0	0	0	0	0	0.0504488	0.067412	0	0.0580376	0	0	0	0	0	0	0	0	0	0	0	0	0.0621534	0	0	0	0	0	0	0	0	0.174995	0	0	0	0	0	0	0	0	0	0	0.166455
HMT83	Lachnoanaerobaculum sp.	0	0	0	0	0	0	0	0	0	0	0	0	0	0	0	0	0	0	0	0	0	0	0	0	0	0	0	0	0	0	0	0	0	0	0	0	0	0	0	0	0	0	0	0	0
HMT85	Ruminococcaceae [G-2] sp.	0	0	0	0	0	0	0	0	0	0	0	0	0	0	0	0	0	0	0	0	0	0	0	0	0	0.184958	0	0	0	0	0	0	0	0	0	0	0	0	0	0	0	0	0	0	0
HMT88	Lachnospiraceae [G-2] sp.	0	0	0	0	0.098471	0	0.139215	0	0	0	0	0	0	0	0	0	0	0.124894	0	0	0	0	0	0	0	0	0	0	0	0	0	0	0	0	0	0	0	0	0	0	0	0	0	0.0994341	0
HMT89	Lachnoanaerobaculum sp.	0	0	0	0	0	0	0	0	0.201795	0	0	0	0	0	0	0	0	0	0	0	0	0	0	0	0	0.945341	0	0	0	0	0	0	0	0	0	0	0	0	0	0	0	0	0	0	0
HMT90	Butyrivibrio sp.	0	0	0	0	0	0	0	0	0	0	0	0	0	0	0	0	0	0	0	0	0	0	0	0	0	0	0	0	0	0	0	0	0	0	0	0	0	0	0	0	0	0	0	0	0
HMT91	Peptostreptococcaceae [XI][G-2] sp.	0	0	0	0	0	0	0	0	0	0.067412	0	0	0	0	0	0	0	0	0	0	0	0	0	0	0	0	0	0	0	0	0	0	0	0	0	0	0	0	0	0	0	0	0.0522474	0	0
HMT93	Clostridiales [F-1][G-1] sp.	0	0	0	0	0	0	0	0	0	0	0	0	0	0	0	0	0	0	0	0	0	0	0	0	0	0	0	0	0	0	0	0	0	0	0	0	0	0	0	0	0	0	0	0	0
HMT94	Lachnospiraceae [G-10] sp.	0	0	0	0	0	0	0	0	0	0	0	0	0	0	0	0	0	0	0	0	0	0	0	0	0	0	0	1.0789	0	0	0	0	0	0	0	0	0	0	0	0	0	0	0	0	0
HMT95	Shuttleworthia satelles	0	0	0	0	0	0	0	0	0	0.0539296	0	0	0	0	0	0	0	0	0	0	0	0	0	0	0	0	0	0	0	0	0	0	0	0	0	0	0	0	0	0	0	0	0	0	0
HMT96	Lachnospiraceae [G-2] sp.	0	0	0	0	0	0	0	0	0	0	0	0	0	0	0	0	0	0	0	0	0	0	0	0	0	0	0	0	0	0	0	0.0716977	0	0	0	0	0	0	0	0	0	0	0	0	0
HMT97	Stomatobaculum sp.	0	0	0	0.105012	0	0	0	0	0	0	0	0	0	0	0	0	0	0	0	0	0	0	0	0	0	0	0	0	0	0	0.0553546	0	0	0	0	0	0	0	0	0	0	0	0	0	0
HMT100	Lachnospiraceae [G-3] sp.	0	0	0	0	0	0	0	0	0	0	0	0	0	0	0	0	0	0	0	0	0	0	0	0	0	0.116455	0	0	0	0	0	0	0.0986988	0	0	0	0	0	0	0	0	0	0	0	0
HMT102	Oribacterium sp.	0	0	0	0	0	0	0	0	0	0	0	0	0	0	0	0	0	0	0	0	0	0	0	0	0	0	0	0	0	0	0	0	0	0	0	0	0	0	0	0	0	0	0	0	0
HMT107	Lachnoanaerobaculum umeaense	0	0	0	0	0	0	0	0.0754167	0	0	0	0	0	0	0	0	0	0	0	0	0	0	0	0	0	0	0	0	0	0	0	0	0	0	0	0	0	0	0	0	0	0	0	0	0
HMT108	Oribacterium asaccharolyticum	0	0	0	0	0	0	0	0	0	0	0	0	0	0	0	0	0	0	0	0	0	0	0	0	0	0	0	0	0	0	0	0	0	0	0	0	0	0	0	0	0	0	0	0	0
HMT113	Peptoniphilaceae [G-1] sp.	0	0	0.0564627	0	0	0	0	0	0.706283	0	0	0	0	0	0	0	0.255026	0	0	0	0	0	0	0	0	0	0	0	0	0.206393	0	0	0	0	0	0	0	0	0	0.195112	0	0.428817	0	0	0
HMT118	Dialister invisus	0	0	0	0.0870101	0	0	0	0	2.10443	0.0770423	0	0.132657	0	0	0	0	0	0	0	0	0	0	0	0	0	0.0528452	0	0	0	0.801291	0	0	0	0	0	0	0	0	0	0	0	0.0680662	0	0	0.49342
HMT119	Dialister sp.	0	0	0	0	0	0	0	0	0	0	0	0	0	0	0	0	0	0	0	0	0	0	0	0	0	0	0	0	0	0	0	0	0	0	0	0	0	0	0	0	0	0	0	0	0
HMT121	Anaeroglobus geminatus	0	0.103983	0	0	0	0	0	0	0.288279	0	0	0	0	0	0.0826828	0	0	0	0	0	0	0	0.33284	0	0	0	0	0	0	0	0	0	0	0	0	0	0	0	0	0	0	0	0	0	0.225903
HMT122	Megasphaera micronuciformis	0	0	0	0	0	0	0	0	0	0	0	0	0	0	0	0	0	0	0	0	0	0	0	0	0	0	0	0	0	0	0	0	0	0	0	0.105082	0	0	0	0	0	0	0	0	0
HMT123	Megasphaera sp.	0	0	0	0	0	0	0	0	0	0	0	0	0	0	0	0	0	0	0	0	0	0	0	0	0	0	0	0	0	0	0	0	0	0	0	0	0	0	0	0	0	0	0	0	0
HMT131	Mitsuokella sp.	0	0	0	0	0	0	0	0	0	0	0	0	0	0	0	0	0	0	0	0	0	0	0	0	0	0	0	0	0	0	0	0	0	0	0	0	0	0	0	0	0	0	0	0	0
HMT166	Johnsonella sp.	0	0	0	0	0	0	0	0	0	0	0	0	0	0	0	0	0	0.124894	0	0	0	0	0.0535605	0	0.169195	0	0	0	0	0.145689	0	0	0	0	0	0	0	0	0	0	0	0	0	0.348019	0
HMT179	Actinomyces timonensis	0	0	0	0	0	0	0	0	0	0	0	0	0	0	0	0	0	0	0	0	0	0	0	0	0	0	0	0	0	0	0	0	0	0	0	0	0	0	0	0	0	0	0	0	0
HMT183	Actinobaculum sp.	0	0	0	0	0	0	0	0	0	0	0	0.928601	0	0	0	0	0	0	0	0	0	0	0	0.143799	0	0	0	0	0	0	0	0	0	0	0	0	0	0	0	0	0	0	0	0	0
HMT189	Kocuria sp.	0	0	0	0	0	0	0	0	0	0	0	0	0	0	0	0	0	0	0	0	0	0	0	0	0	0	0	0	0	0	0	0	0	0	0	0	0	0	0	0	0	0	0	0	0
HMT190	Arsenicicoccus bolidensis	0	0	0	0	0	0	0	0	0	0	0	0	0	0	0	0	0	0	0	0	0	0	0	0	0	0	0	0	0	0	0	0	0	0	0	0	0	0	0	0	0	0	0	0	0
HMT191	Propionibacterium acidifaciens	0	0	0	0	0	0	0	0	0	0	0	0	0	0	0	0	0	0	0	0	0	0	0	0	0	0	0	0	0	0	0	0	0	0	0	0	0	0	0	0	0	0	0	0	0
HMT192	Propionibacterium sp.	0	0	0	0	0	0	0	0	0	0	0	0	0	0	0	0	0	0	0	0	0	0	0	0	0	0	0	0	0	0	0	0	0	0	0	0	0	0	0	0	0	0	0	0	0
HMT195	Scardovia wiggsiae	0	0	0	0	0	0	0	0	0	0	0	0	0	0	0	0	0	0	0	0	0	0	0	0	0	0	0	0	0	0	0	0	0	0	0	0	0	0	0	0	0	0	0	0	0
HMT198	Alloscardovia omnicolens	0	0	0	0	0	0	0	0	0	0	0	0	0	0	0	0	0	0	0	0	0	0	0	0	0	0	0	0	0	0	0	0	0	0	0	0	0	0	0	0	0	0	0	0	0
HMT199	Atopobium sp.	0	0	0	0	0	0	0	0	0	0	0	0	0	0	0	0	0	0	0	0	0	0	0	0	0	0.0822036	0	0	0	0	0	0	0	0	0	0	0	0	0	0	0	0	0	0	0.0832276
HMT214	Leptotrichia shahii	0	0	0	0	0	0	0	0	0	0	0	0	0	0	0	0	0	0	0	0	0	0	0	0	0.0538663	0	0	0	0	0	0	0	0	0	0	0	0	0	0	0	0	0.200115	0	0	0.141487
HMT215	Leptotrichia sp.	0	0	0	0	0	0	0	0.0905001	0	0	0	0	0	0	0	0	0	0	0	0	0	0	0	0	0	0	0	0	0	0	0	0	0	0	0	0	0	0	0	0	0	0	0	0	0
HMT218	Leptotrichia sp.	0	0	0	0	0	0	0	0	0	0	0	0	0	0	0	0	0	0	0	0	0	0	0	0	0	0	0	0	0	0	0	0	0	0	0	0	0	0	0	0	0	0	0	0	0
HMT219	Leptotrichia sp.	0	0	0	0	0	0.150996	0	0	0	0	0	0	0	0	0	0	0	0	0.396184	0	0	0	0	0	0	0	0	0	0	0	0	0	0	0	0	0	0	0	0	0	0	0	0	0	0
HMT221	Leptotrichia sp.	0	0	0	0	0	0	0	0	0	0	0	0	0	0	0	0	0	0	0	0	0	0	0	0	0	0	0	0	0	0	0	0	0	0	0	0	0.114409	0	0	0	0	0	0	0	0
HMT223	Leptotrichia sp.	0	0	0	0	0	0	0	0.22625	0	0	0	0	0	0	0	0	0	0	0	0	0	0	0	0	0	0	0	0	0	0	0	0	0	0	0	0	0	0	0	0	0	0.114351	0	0	0
HMT225	Leptotrichia sp.	0	0	0	0	0	0	0	1.28963	0	0	0.224274	0.0928601	0	0	0	0	0	0	0	0	0	0	0	0	0	0	0	0	0.0850028	0	0	0	0	0	0	0	0	0	0	0	0	0	0	0	0
HMT227	Treponema sp.	0	0	0	0	0	0	0	0	0	0	0	0	0	0	0	0	0	0	0	0	0	0	0	0	0	0	0	0	0	0	0	0	0	0	0	0	0	0	0	0	0	0	0	0	0
HMT232	Treponema sp.	0	0	0	0	0	0	0	0	0	0	0	0	0	0	0	0	0	0	0	0	0	0	0	0	0	0	0	0	0	0	0	0	0	0	0	0	0	0	0	0	0	0	0	0	0
HMT234	Treponema sp.	0	0	0.0677553	0	1.62477	0	2.485	0	0	0	0	0	0.177326	0	0	2.12392	0	0.749362	0	0.92194	0	0	1.88801	0	0	0	0	0	0	0	0	0.810735	0.0657992	0	1.04556	0	0	0.848132	0	0	0	0	0	0	0
HMT238	Treponema sp.	0	0	0	0	0.620368	0	0	0	0	0	0	0	0	0	0	0	0	0	0	0	0	0	2.45039	0	1.64707	0	0	0	0	0	0	0	0.427695	0	0	0.0525412	0	0.117796	0	0	0	0	0	0	0
HMT239	Treponema sp.	0	0	0	0	0	0	0	0	0	0	0	0	0	0	0	0	0	0	0	0.184388	0	0	0	0	0	0	0	0.719267	0	0	0	0.231639	0	0	0.348521	0	0	0.353388	0	0	0	0	0	0	0
HMT249	Treponema sp.	0	0	0	0	0	0	0	0	0	0	0	0	0	0	0	0	0	0	0	0	0	0	0	0	0	0	0	0.53945	0	0	0	0	0	0	0	0	0	0	0	0	0	0	0	0	0
HMT252	Treponema sp.	0	0	0	0	0	0	0	0	0	0	0	0	0	0	0	0	0	0	0	0.368776	0	0	0	0	0	0	0	0	0	0	0	0	0	0	0	0	0	0	0	0	0	0	0	0	0
HMT253	Treponema sp.	0	0	0	0	0	0	0	0	0	0	0	0	0	0	0	0	0	0	0	0	0	0	0	0	0	0	0	0	0	0	0	0	0	0	0	0	0	0	0	0	0	0	0	0	0
HMT254	Treponema sp.	0	0	0	0	0.147707	0	0	0	0	0	0	0	0.177326	0	0	0	0	0	0	0	0	0	1.68716	0	0	0	0	1.61835	0	0	0	0.562551	0	0	0.261391	0	0	0.400507	0	0	0	0	0.339608	0.596605	0
HMT256	Treponema sp.	0	0	0	0	0	0	0	0	0	0	0	0	0	0	0	0	0	0.749362	0	0.737552	0	0	0.0803407	0	2.81762	0	0	0	0	0	0	0.0827281	0	0	0.0871302	0	0	0.0942369	0	0	0	0	0	3.02031	0
HMT257	Treponema sp.	0	0	0	3.69643	0.206789	0	2.19264	0	0	0	0	0	0	0	0	0	0	0	0	0.645358	0.945003	0	0.622641	0	1.20163	0	0	0	0	0	0	0	1.41468	0	0.0871302	0.0788118	0	0	0	0	0.279882	0	0.169804	2.03218	0
HMT258	Treponema sp.	0	0	0.0677553	0	0.472661	0	0.563823	0	0.0504488	0.067412	0	0	0	0	0	0	0	0	0	0.092194	0	0	0	0	0.155384	0	0	0.269725	0	0	0	0	0.0986988	0	0	0	0	0.0706777	0	0.0831033	0	0	0.496351	0	0
HMT262	Treponema sp.	0	0	0.191973	0	0	0	2.3597	0	0	0	0	0	0	0	0	0	0	0	0	0	0	0	0	0	0	0	0	0	0	0	0	0	0	0	0.0871302	0	0	0	0	0	0.146207	0	0.0653093	0.130507	0
HMT265	Treponema sp.	0	0	0	0	0	0	0	0	0	0	0	0	0	0	0	0	0	0	0	0	0	0	0	0	0	0	0	0	0	0	0	0	0	0	0	0	0	0	0	0	0	0	0	0	0
HMT270	Treponema sp.	0.0877542	0	0	0	0	0	0	0	0	0	0.237213	0	0	0	0	0	0	0	0	0	0	0	0	0	0.0725124	0	0	0	0	0	0	0	0	0	0	0	0	0	0	0	0	0	0	0	0
HMT271	Treponema sp.	0	0	0	0	0	0	0	0	0	0	0	0	0	0	0	0	0	0	0	0	0	0	0	0	0	0	0	0	0	0	0	0	0	0	0	0	0	0	0	0	0	0	0	0	0
HMT272	Bacteroidaceae [G-1] sp.	0	0.0808754	0	0	0	0	0	0	0.0864836	0	0	0	0	0	0	0	0	0	0	0.0526823	0	0	0	0	0	0	0	0	0	0	0	0	0	0	0	0	0	0	0	0	0	0	0	0	0
HMT274	Bacteroidales [G-2] sp.	0	0.242626	0.210794	0.0840097	0	4.25585	0	0.113125	0.067265	0	0.258778	0.154767	0.118218	0.273103	0	1.7306	0	0.749362	0	0.368776	0.118125	2.53125	0	0	0.0966831	0.068503	12.1544	0.119878	0	1.12504	0	0.0882433	0.307063	0	6.44764	0	35.3338	6.1254	0	0	5.76472	0	0	1.78981	0
HMT280	Bacteroidetes [G-3] sp.	0	0.404377	0	0	0	0	0	0	0	0	0.0862593	0	0	0	0	0	0	0	0	0	0	0	0	0	0	0	0	0	0	0.218534	0	0.0661825	0	0.349991	0.17426	0	0	0.0942369	0	0	0.300768	0	0	0.0745756	0
HMT281	Bacteroidetes [G-3] sp.	0	0	0	0	0	0	0	0	0	0	0	0	0	0	0	0	0	0	0	0	0	0	0	0	0	0	0	0	0	0.0607038	0	0	0	0	0	0	0	0	0	0	0	0	0	0	0
HMT288	Prevotella oulorum	0	0	0	0	0	0	0	0	0	0	0	0	0	0	0	0	0	0	0	0	0	0	0	0	0	1.78793	0	0	0.0676159	0.0607038	0	0	0	0	0	0.131353	0	0	0	0	0	0.22632	0	0	0
HMT289	Prevotella maculosa	0	0	0.0564627	0	0	0	0	0.141406	0.201795	0	0	0.522338	0	0	0	0	0	0	0	0	0	0	0	0	0	0	0	0	0	0.0971261	0	0	0	0	0	0.341518	0	0	0	0	0	0	0	0	0.3017
HMT291	Prevotella denticola	0	0	0	5.85968	0	0.293604	0	0.197969	0.252244	0	0	0	0	0	0	0	0	0	0	0	0	0	0.0803407	0	0.139845	0	0	0	0	0	0	0	0.115149	0.145829	0	2.73214	0	0	0	0	0	0.119116	0	0	0.488962
HMT299	Prevotella nanceiensis	0	0	0	0.126015	0	0	0	0	0	0	0	0	0	0	0	0	0	0	0.152998	0	0	0	0	0	0	0	0	0	0.0515169	0	0	0	0	0	0	0	0	0	0	0	0	0	0	0	0
HMT301	Prevotella sp.	0	0	0	0	0	0	0	0	0	0	0	0	0	0	0	0	0	0	0	0	0	0	0	0	0	0	0	0	0	0.121408	0	0	0	0	0	0	0	0	0	0	0	0	0	0	0
HMT302	Alloprevotella rava	0	0	0	0.493557	0.0886239	0.050332	0	0	0.151346	0	0	0	0	0	0	0	0	0	0	0.184388	0	0	0.140596	0	0.0621534	0	0.0886103	0	0	0	0	0	0	0	0	0.0525412	0	0	0	0	0.133675	0	0	0	0
HMT303	Prevotella pleuritidis	0	0.356357	0.440409	0.850598	0	0	0.344558	0.113125	0	0.134824	0	0.0580376	5.0538	10.3438	0	0	0	0.562022	0	0.553164	0	0.52207	0	0	0.222717	0	1.9605	0	0	0.121408	0	1.91102	0.921189	0	0.217826	2.70587	1.5964	2.29703	0	0	4.85406	0	0	1.00677	0
HMT304	Prevotella sp.	0	0	0.158096	0	0	0	0	0	0	0	0	0	0	0	0	0	0	0	0	0	0	0	1.34571	0	2.2945	0	0	1.43853	0	0.169971	0	0.355731	0.0657992	0	0	0	0	0	0	0	2.22652	0	0	0	0
HMT305	Prevotella sp.	0	0	0	0	0	0	0	0	0	0	0	0	0	0	0	0	0	0	0	0	0	0	0	0	0	0	0	0	0	0	0	0	0	0	0	0	0	0	0	0	0	0	0	0	0
HMT307	Prevotella salivae	0	0	0	0	0	0	0	0	0	0	0	0	0	0	0	0	0	0	0	0	0	0	0	0	0	0	0	0	0	0	0	0	0	0	0	0	0.0731686	0	0	0	0	0.119116	0	0	0
HMT309	Prevotella sp.	0	0	0	0	0	0	0	0	0	0	0	0	0	0	0	0	0	0	0	0	0	0	0	0	0	0	0	0	0	0	0	0	0	0	0	0	0	0	0	0	0	0	0	0	0
HMT311	Prevotella oris	0	0	0	0.593319	0.251101	0.59979	0.0835293	0.254532	0.706283	0	0	12.4781	0	0	0	0	0	1.12404	0.247615	2.12046	0	0	0.341448	0	0.372921	2.55859	0	0	0	0	0	0	0.164498	0.904142	1.43765	8.45913	0	4.01685	0	0	0.18798	0	0	1.37965	0
HMT315	Prevotella sp.	0	0	0	0	0	0	0	0	0	0	0	0	0	0	0	0	0	0	0	0	0	0	0	0	0	0	0	0	0	0	0	0	0	0	0	0	0	0	0	0	0	0	0	0	0
HMT317	Prevotella sp.	0	0	0	0	0	0.238238	0	0	0.080718	0	0.103511	0.13929	0	0	0	0	0	0	0	0	0	0	0	0	2.33283	0.147966	0	0	0	0.0922698	0	0	5.4087	0	0	0.840659	0.098445	0	0	0	0	0.0667049	0	0.193897	0
HMT318	Pedobacter sp.	0	0	0	0	0	0	0	0	0	0	0	0	0	0	0	0	0	0	0	0	0	0	0	0	0	0	0	0	0	0	0	0	0	0	0	0	0	0	0	0	0	0	0	0	0
HMT319	Bergeyella sp.	0	0	0	0	0	0	0	0	0	0	0	0	0	0	0	0	0	0	0	0	0	0	0	0	0	0	0	0	0	0	0	0	0	0	0	0	0	0	0	0	0	0	0	0	0
HMT320	Flavitalea sp.	0	0	0	0	0	0	0	0	0	0	0	0	0	0	0	0	0	0	0	0	0	0	0	0	0	0	0	0	0.193188	0	0	0	0	0	0	0	0	0	0	0	0	0	0	0	0
HMT322	Bergeyella sp.	0	0	0	0.0770089	0	0	0	0	0	0	0	0.0773834	0	0	0	0	0	0	1.47361	0	0	0	0	0	0	0	0	0	0.128792	0	0	0	0.0657992	0	0	0	0	0	0.110815	0	0	0	0	0	0
HMT326	Capnocytophaga sp.	0	0	0	0	0	0	0	1.10297	0.0504488	0	0.0862593	0.116075	0	0	0	0	0	0	0	0	0	0	0	0	0.196819	0	0	0	0.106254	0	0	0	0.263197	0	0	0	0	0.0824573	0	0	0	0	0	0	0
HMT329	Capnocytophaga leadbetteri	0	0	0	0	0	0	0	5.06235	0	0.067412	0	0	0	0	0	0	0	0	0.0543544	0.737552	0	0	0	0	0.0828713	5.53847	0	0	0.676159	0	0	0	0.378346	0	0	0	0.0864719	0	0	0	0	0	0.0522474	0	1.72697
HMT332	Capnocytophaga sp.	0	0	0	0	0	0	0	0	0	0	0	0	0	0	0	0	0	0	0	0	0	0	0	0	0	0	0	0	0	0	0	0	0.263197	0	0	0	0	0	0	0	0	0	0	0	0
HMT337	Capnocytophaga gingivalis	1.87209	0	0.0677553	0.0577567	0	0.595596	0	3.39375	0	0	0	0	0	0	0	0	0	0	0.434836	0	0	0	0	0	0	0	0	0	0	0	0	0	0.493494	0	0	0.131353	0.246112	0	0	0	0	0.0714695	0	0	0.093631
HMT338	Capnocytophaga sp.	0	0	0	0.217025	0	0.100664	0	0	0	0	0	0.0773834	0	0	0	0	0	0	0	0	0	0	0	0	0	0	0	0	0	0	2.9338	0	0.0657992	0	0	0.315247	0	0.0942369	0	0	0	0	0	0	0
HMT345	SR1 [G-1] sp.	0	0	0	0	0	0	0	0	0	0	0	0	0	0	0	0	0	0	0	0	0	0	0	0	0	0	0	0	0	0	0	0	0	0	0	0	0	0	0	0	0	0	0	0	0
HMT347	TM7 [G-1] sp.	0	0	0	0	0	0	0	0	0	0	0	0	0	0	0	0	0	0	0	0	0	0	0	0	0	0	0	0	0	0	0	0	0	0	0	0	0	0	0	0	0	0	0	0	0
HMT348	TM7 [G-1] sp.	0	0	0	0	0	0	0	0	0	0	0	0	0	0	0	0	0	0	0	0	0	0	0	0	0	0	0	0	0	0	0	0	0	0	0	0	0	0	0	0	0	0	0	0	0
HMT349	TM7 [G-1] sp.	0	0	0	0	0	0	0	0	0	0	0	0	0	0	0	0	0	0	0	0	0	0	0	0	0	0	0	0	0	0	0	0	0	0	0	0	0	0	0	0	0	0	0	0	0
HMT350	TM7 [G-2] sp.	0	0	0	0	0	0	0	0	0	0	0	0	0	0	0	0	0	0	0	0	0	0	0	0	0	0	0	0	0	0	0	0	0	0	0	0	0	0	0	0	0	0	0	0	0
HMT351	TM7 [G-3] sp.	0	0	0	0	0	0	0	0	0	0	0	0	0	0	0	0	0	0	0	0	0	0	0	0	0	0	0	0	0	0	0	0	0	0	0	0	0	0	0	0	0	0	0	0	0
HMT355	TM7 [G-4] sp.	0	0	0	0	0	0	0	0	0	0	0	0	0	0	0	0	0	0	0	0	0	0	0	0	0	0	0	0	0	0	0	0	0	0	0	0	0	0	0	0	0	0	0	0	0
HMT356	TM7 [G-5] sp.	0	0	0	0	0	0	0	0	0	0	0	0	0	0	0	0	0	0	0	0	0	0	0	0	0	0	0	0	0	0	0	0	0	0	0	0	0	0	0	0	0	0	0	0	0
HMT357	Pyramidobacter piscolens	0	0	0	0	0	0	0	0	0	0	0	0	0.0591088	0	0	0	0	0	0	0	0	0	0	0	0	0	0	0	0	0	0	0	0	0	0	0	0	0	0	0	0	0	0	0	0
HMT363	Fretibacterium fastidiosum	1.71608	1.69164	2.21334	0	0.177248	0.732611	0.765685	0.113125	0.26906	5.66261	0.546309	0	0.591088	1.50207	1.54341	0	3.40035	1.24894	0	0.614627	1.83094	3.92344	5.43639	0	0.66297	0	2.17095	0.239756	0	1.49736	0	0.595642	0.263197	1.55551	0.697042	0	1.92455	0.832426	0	2.57259	1.45371	0.412935	1.63709	0.646322	0.0832276
HMT365	Bacteroidetes [G-3] sp.	0	0	0	0	1.75278	0	0	0	0	0	0	0	0	0	0	0	0	0.124894	0	0	0	0	0	0	0	0	0	0	0	0.121408	0	0	0	0	0	0	0	0	0	0	0.225576	0	0	0	0
HMT366	Ruminococcaceae [G-3] sp.	0	0	0	0	0	0	0	0	0	0	0	0	0	0	0	0	0	0	0	0	0	0	0	0	0	0	0	0	0	0	0	0	0	0	0	0	0	0	0	0	0	0	0	0	0
HMT368	Dietzia cinnamea	0	0	0	0	0	0	0	0	0	0	0	0	0	0	0	0	0	0	0	0	0	0	0	0	0	0	0	0	0	0	0	0	0	0	0	0	0	0	0	0	0	0	0	0	0
HMT373	Stomatobaculum sp.	0	0	0	0	0	0	0	0	0	0.0898827	0	0	0	0	0	0	0	0	0	0	0	0	0	0	0	0	0	0	0	0.0809385	0	0	0	0	0	0	0	0	0	0	0	0	0	0	0
HMT375	Peptoniphilus sp.	0	0	0	0	0	0	0	0	0	0	0	0	0	0	0	0	0	0	0	0	0	0	0	0	0	0	0	0	0	0	0	0	0	0	0	0	0	0	0	0	0	0	0	0	0
HMT376	Prevotella sp.	0	0	0	0	0	0	0.125294	0	0	0	0	0	0	0	0	0	0	0	0	0	0	0	0	0	0.178173	0	0	0	0	0	0	0	0	0	0.0697042	0	0	0.0753895	0	0	0	0	0	0	0.224714
HMT378	Prevotella micans	0	0	0	0	0	0	0	0	0.13453	0	0	0	0	0	0	0	0	0	0	0	0	0	0	0	0	0	0	0	0	0.485631	0	0	0	0	0	0	0	0	0	0	0	0	0	0	0
HMT381	Ruminococcaceae [G-3] sp.	0	0	0	0	0	0	0	0	0	0	0	0	0	0	0	0	0	0	0	0	0	0	0	0	0	0	0	0	0	0	0	0	0	0	0	0	0	0	0	0	0	0	0	0	0
HMT382	Peptostreptococcaceae [XI][G-8] sp.	0	0	0	0	0	0	0	0	0	0	0	0	0	0	0	0	0	0	0	0	0	0	0	0	0	0	0	0	0	0	0	0	0	0	0	0	0	0	0	0	0	0	0	0	0
HMT383	Peptostreptococcaceae [XI][G-1] sp.	0	0	0	0	0	0	0	0	0	0	0	0	0	0	0	0	0	0	0	0	0	0	0	0	0	0	0	0	0	0	0	0	0	0	0	0	0	0	0	0	0	0	0	0	0
HMT386	Peptoniphilus sp.	0	0	0	0	0	0	0	0	0	0	0	0	0	0	0	0	0	0	0	0	0	0	0	0	0	0	0	0	0	0	0	0	0	0	0	0	0	0	0	0	0	0	0	0	0
HMT388	S elenomonas sp.	0	0	0	0	0	0	0	0	0	0	0	0	0	0	0	0	0	0	0	0	0	0	0	0	0	0	0	0	0	0	0	0	0	0	0	0	0	0	0	0	0	0	0	0	0
HMT389	Abiotrophia defectiva	0	0	0	0.108513	0	0.050332	0	0	0	0	0	0	0	0	0	0	0	0	0	0	0	0	0	0	0	0	0	0	0	0	0	0	0	0	0	0	0	0	0.0957041	0	0	0.0635285	0	0	0
HMT392	Leptotrichia sp.	0	0	0	0	0	0	0	0.294125	0	0	0	0	0	0	0	0	0	0	0	0.0737552	0	0	0	0	0.107733	0	0	0	1.32914	0	0	0	0.144758	0	0	0	0	0	0	0	0	0	0	0	0.116519
HMT396	Prevotella sp.	0	0	0	0	0	0	0	0	0	0	0	0	0	0	0	0	0	0	0	0	0	0	0	0	0	0	0	0	0	0	0	0	0	0	0	0	0	0	0	0	0	0	0	0	0
HMT402	Clostridiales [F-1][G-2] sp.	0	0	0	0	0	0	0	0	0	0	0	0	0	0	0	0	0	0	0	0	0	0	0	0	0	0	0	0	0	0	0	0	0	0	0	0	0	0	0	0	0	0	0	0	0
HMT414	Actinomyces sp.	0	0	0	0	0	0	0	0	0	0	0	0	0	0	0	0	0	0	0	0	0	0	0	0	0	0	0	0	0	0	0	0	0	0	0	0	0	0	0	0	0	0	0	0	0
HMT416	Atopobium sp.	0	0	0	0	0	0	0	0	0	0	0	0	0	0	0	0	0	0	0	0	0	0	0	0	0	0	0	0	0	0	0	0	0	0	0	0	0	0	0	0	0	0	0	0	0
HMT422	Bergeyella sp.	0	0	0	0	0	0	0	0	0	0	0	0	0	0	0	0	0	0	0	0	0	0	0	0	0	0	0	0	0	0	0	0	0	0	0	0	0	0	0	0	0	0	0	0	0
HMT435	Syntrophomonadaceae [VIII][G-1] sp.	0	0	0	0	0	0	0	0	0	0	0	0	0	0	0	0	0	0	0	0	0	0	0	0	0	0	0	0	0	0	0	0	0	0	0	0	0	0	0	0	0	0	0	0	0
HMT436	Bacteroidetes [G-3] sp.	0	0	0	0	0	0	0	0	0	0	0	0	0	0	0	0	0	0	0	0	0	0	0	0	0	0	0	0	0	0	0	0	0	0	0	0	0	0	0	0	0	0	0	0	0
HMT439	Anaerolineae [G-1] sp.	0.234011	0.313392	0.135511	0	0	0	0	0	0.100898	0	0	0	0	0	0	0	0	0	0	0	0	0.0949219	0	0	0	0	0	0	0	0.376364	0	0.198547	0	0	0	0	0	0	0	0	0.0584827	0.428817	0.182866	0	0
HMT443	Prevotella sp.	0	0	0	0	0	0	0	0	0	0	0	0	0	0	0	0	0	0	0	0	0	0	0	0	0	0	0	0	0	0.303519	0	0	0	0	0	0	0	0	0	0	0	0	0	0	0
HMT448	Actinomyces sp.	0	0	0	0	0	0	0	0	0.100898	0	0	0.0580376	0	0	0	0	0	0	0	0	0	0	0	0	0	0	0	0	0	0	0	0	0	0	0	0	0	0	0	0	0	0	0	0	0
HMT451	Catonella sp.	0	0.121313	0	0.126015	0.531744	0	0	0	0	0	0	0	0	0	0	0	0	0	0	0	0	0	0.401704	0	0	0	0.708883	0	0	0	0	0	0.0657992	0	0	0	0	0	0	0	0	0	0	0.0745756	0
HMT455	Butyrivibrio sp.	0	0	0	0	0	0	0	0	0	0	0	0	0	0	0	0	0	0	0	0	0	0	0	0	0	0	0	0	0	0	0	0	0	0	0	0	0	0	0	0	0	0	0	0	0
HMT459	Kingella sp.	0	0	0	0	0	0	0	0	0	0	0	0.0773834	0	0	0	0	0	0	0	0	0	0	0	0	0	0	0	0	0	0	0	0	0	0	0	0	0	0	0	0	0	0	0	0	0
HMT465	Bacteroides zoogleoformans	0	0.0982058	0	0	0	0	0	0	0	0	0	0	0	0	0	0	0	0	0	0	0	0	0	0	0	0	0	0	0	0	0	0	0	0	0	0	0	0	0	0	0	0	0	0	0
HMT466	Alloprevotella tannerae	0	0	0.171647	0.281433	0	0.96302	0	0	0	0	0.552059	3.2501	0	2.21213	0	0	0	0.899235	0	0	0	0	0.112477	0	0.0994455	22.1539	0.824076	0	0	0	0	0	2.0661	0	0	0.903709	0	0	0	0	0.0835467	0.114351	0	0.462369	7.18254
HMT468	Bacillus subtilis	0	0	0	0	0	0	0	0	0	0	0	0	0	0	0	0	0	0	0	0	0	0	0	0	0	0	0	0	0	0	0	0	0	0	0	0	0	0	0	0	0	0	0	0	0
HMT473	Alloprevotella sp.	0	0	0	0	0	0	0	0	0	0	0.115012	0	0	0	0	0	0	0.124894	0	0.184388	0	0	0	0	0	0	0	0	0	0	0	0	0.0767658	0	0	0	0	0	0	0	0	0	0	0	0
HMT475	Prevotella sp.	0	0	0	0	0	0	0	0	0	0	0	0	0	0	0	0	0	0	0	0	0	0	0	0	0	0	0	0	0	0	0	0	0	0	0	0	0	0	0	0	0	0	0	0	0
HMT477	Pseudomonas stutzeri	0	0	0	0	0	0	0	0	0	0	0	0	0	0	0	0	0	0	0	0	0	0	0	0	0	0	0	0	0	0	0	0	0	0	0	0	0	0	0	0	0	0	0	0	0
HMT484	Erysipelothrix tonsillarum	0	0	0	0	0	0	0	0	0	0	0	0	0	0	0	0	0	0	0	0	0	0	0	0	0	0	0	0	0	0	0	0	0	0	0	0	0	0	0	0	0	0	0	0	0
HMT485	Agrobacterium tumefaciens	0	0	0	0	0	0	0	0	0	0	0	0	0	0	0	0	0	0	0	0	0	0	0	0	0	0	0	0	0	0	0	0	0	0	0	0	0	0	0	0	0	0	0	0	0
HMT488	TM7 [G-1] sp.	0	0	0	0	0	0	0	0	0	0	0	0	0	0	0	0	0	0	0	0	0	0	0	0	0	0	0	0	0	0	0	0	0	0	0	0	0	0	0	0	0	0	0	0	0
HMT490	Treponema sp.	0	0	0	0	0	0	0	0	0	0	0	0	0	0	0	0	0	0	0	0.276582	0	0	0	0	0	0	0	0.629359	0	0	0	0.620461	0	0	0.609912	0	0	0.365168	0	0	0	0	0	0	0
HMT493	Peptostreptococcaceae [XI][G-5] sp.	0	0	0	0	0	0	0	0	0	0	0	0	0	0	0	0	0	0	0	0	0	0	0	0	0	0	0	0	0	0	0	0	0	0	0	0	0	0	0	0	0	0	0	0	0
HMT494	Lachnoanaerobaculum saburreum	0	0	0	0	0	0	0	0	0	0	0	0	0	0	0	0	0	0	0	0	0	0	0	0	0	0	0	0	0	0	0	0	0	0	0	0	0	0	0	0	0	0	0	0	0
HMT495	Peptostreptococcaceae [XI][G-3] sp.	0	0	0	0	0	0	0	0	0	0	0	0	0	0	0	0	0	0	0	0	0	0	0	0	0	0	0	0	0	0	0	0	0	0	0	0	0	0	0	0	0	0	0	0	0
HMT496	Lachnoanaerobaculum sp.	0	0	0	0	0	0	0	0	0	0	0	0	0	0	0	0	0	0	0	0	0	0	0	0	0	0	0	0	0	0	0	0	0	0	0	0	0	0	0	0	0	0	0	0	0
HMT498	Leptotrichia sp.	0	0	0	0	0	0	0	0	0	0	0	0	0	0	0	0	0	0	0	0	0	0	0	0	0.0787277	0	0	0	0	0	0	0	0	0	0	0.105082	0	0	0	0	0	0	0	0	0
HMT500	Lachnospiraceae [G-8] sp.	1.40407	0.636893	2.93606	0.0630073	1.94973	0.25166	1.83764	0	0	0.269648	0	0.23215	0	0	0	0	0.340035	0	0	0.368776	0.354376	0.189844	1.20511	0	0.994455	0.0822036	0.443052	0	0	2.08821	0	0.198547	0.263197	0	1.21982	0	0.0532135	0.895251	0	0	0.217221	3.85935	0.574722	2.61015	0
HMT501	Selenomonas sp.	0	0	0	0	0	0	0	0	0	0	0	0	0	0	0	0	0	0	0	0	0	0	0	0	0	0	0	0	0	0	0	0	0	0	0	0	0	0	0	0	0	0	0	0	0
HMT503	Bacteroidetes [G-3] sp.	0	0	0	0	0	0.062915	0	0	0	0	0	0	0	0	0	0	0	0.187341	0	0	0	0	0.0602555	0	0	0	0	0	0	0	0	0	0	0	0.435651	0	0	0.329829	0	0	0.401024	0	0	0	0
HMT504	Mollicutes [G-1] sp.	0	0	0	0	0	0	0	0	0	0	0	0	0	0	0	0	0	0	0	0	0	0	0	0	0	0	0	0.359634	0	0	0	0.115819	0.954089	0	0.0871302	0	0	0	0	0	0	0	0	0.372878	0
HMT505	Bacteroidetes [G-5] sp.	0	0	0	0	1.53615	0	0	0	0	0	0	0	0	0	0	0	0	0	0	0	0	0	0	0	1.47096	0	0	0	0	0	0	0.0661825	0.0657992	0.116664	0.697042	0	0	2.21457	0	0	4.89584	0	0	7.75586	0
HMT507	Bacteroidetes [G-5] sp.	0	0	0.135511	0	0	0	0	0	0	0	0	0	0	0	0	0	0	0	0	0	0	0	0	0	1.35702	0	0	0	0	0	0	0.463277	0	0	0.348521	0	0	2.04965	0	0	0	0	0	0	0
HMT508	Treponema sp.	0	0	0	0	0.177248	0	0	0	0	0	0	0	0.531979	0	0	0	0	0	0	0.184388	0	0	0	0	0	0	0	0.179817	0	0	0	0.182002	0	0	0.958433	0	0	0.824573	0	0	0	0	0	0	0
HMT509	Bacteroidetes [G-4] sp.	0	0	0	0	0	0	0	0	0	0	0	0	4.61049	0	0	0	0	0	0	0	0	0	0	0	0	0	0	8.15169	0	0	0	0	0	0	0	0	0	0	0	0	0	0	0	0	0
HMT511	Bacteroidetes [G-5] sp.	0	0	0	0	0.177248	0.0695061	0	0	0	0	0	0	0	0	0	0	0	0.535259	0	0.158047	0	0	0	0	0.0562341	0	0	0	0	0.31566	0	0	0.131598	0	0	0	0	0.302904	0	0	0	0	0	0.23438	0
HMT515	Prevotella sp.	0	0	0	0	0	0	0	0	0	0	0	0	0	0	0	0	0	0	0	0	0	0	0	0	0	0	0	0	0	0	0	0	0	0	0	0	0	0	0	0	0	0	0	0	0
HMT516	Bacteroidetes [G-6] sp.	0	0	0	0	0.280642	0	0	0	0	17.4597	0	0	0	0	0	0	0	0	0	0	0	0	0	0	0	0	0	0	0	0	0	0	0	0	0	0	0	0	0	0	0	0.262055	0	0	0
HMT518	Treponema sp.	0	0	0	0	0	0	0	0	0	0	0	0	0	0	0	0	0	0	0	0	0	0	0	0	0	0	0	0	0	0	0	1.50565	0	0	0	0	0	0	0	0	0	0	0	0	0
HMT521	Mitsuokella sp.	0	0	0	0	0	0	0	0	0	0	0	0	0	0	0	0	0	0	0	0	0	0	0	0	0	0	0	0	0	0	0	0	0	0	0	0	0	0	0	0	0	0	0	0	0
HMT523	Neisseria sp.	0	0	0	0	0	0	0	0	0	0	0	0	0	0	0	0	0	0	0	0	0	0	0	0	0	0	0	0	0	0	0	0	0	0	0	0	0	0	0	0	0	0	0	0	0
HMT525	Actinomyces sp.	0	0	0	0	0	0	0	0	0	0	0	0.0800518	0	0	0	0	0	0	0	0	0	0	0	0	0	0	0	0	0	0	0	0	0	0	0	0	0	0	0	0	0	0	0	0	0
HMT526	Prevotella sp.	0	0.218363	0.261987	0	0.0827157	0	0.601411	0	0	0.269648	0	0	0	0	0	0	0.136014	0.59949	0	0.14751	0	0	1.71929	0	0.265188	0	0.0708883	0.287707	0	0.844997	0	0	0	1.18997	0	0	0	0.0565422	0	0	0.277375	0.0667049	0	0.507114	0
HMT531	Aggregatibacter actinomycetemcomitans	0	0	0	3.58791	0	0	0	0	0	0	0	0	0	0	0	0	0.113345	0	0	0	0	0	0	0	0	0	0	0	0	0	15.7945	0	0	0	0	0	0	0	0	0	0	0	0	0	0
HMT537	Streptococcus agalactiae	0	0	0	0	0	0	0	0	0	0	0	0	0	0	0	0	0	0	0	0	0	0	0	0	0	0	0	0	0	0	0	0	0	0	0	0	0	0	0	0	0	0	0	0	0
HMT538	Pseudoramibacter alactolyticus	0	0.0687441	0	0	0	0	0	0	0	0.0539296	0.0517556	0	0	0	0	0	0	0	0	0	0.0945003	0	0	0	0	0	0	0	0	0.0922698	0	0.052946	0	0	0.313669	0	0	0.282711	0	0	0	0	1.82866	0	0
HMT539	Filifactor alocis	1.98909	3.90982	3.13933	0.189022	2.76211	2.50821	3.91543	0.113125	1.46301	4.31437	1.85457	1.10271	1.10829	0	0.723474	0.275323	1.27513	4.12149	0	0.92194	0	0	3.23371	0	1.07733	0	1.92727	1.52844	0	4.48601	0	0.273003	0.246747	0	0.304956	0	2.64405	1.50779	0	1.55367	1.35763	1.20307	0.457165	1.78981	0.312103
HMT540	Cardiobacterium valvarum	0	0	0	0.17502	0	0	0	0.113125	0	0	0.0575062	0.541684	0	0	0	0	0	0	0.0885776	0	0	0	0	0	0	0	0	0	0.0643961	0	0	0	0	0	0	0	0	0	0	0	0	0	0	0	0
HMT541	Treponema amylovorum	0	0	0	0	0	0.306187	0	0	0	0	0	0	0	0	0	0	0	0	0	0.092194	0.369142	0	0	0	0	0	1.56176	0	0	0	0	0	0	0	0	0	0	0	0	0	0	0	0	0	0
HMT544	Ochrobactrum anthropi	0	0	0	0	0	0	0	0	0	0	0	0	0	0	0	0	0	0	0	0	0	0	0	0	0	0	0	0	0	0	0	0	0	0	0	0	0	0	0	0	0	0	0	0	0
HMT552	Propionibacterium avidum	0	0	0	0	0	0	0	0	0	0	0	0	0	0	0	0	0	0	0	0	0	0	0	0	0	0	0	0	0	0	0	0	0	0	0	0	0	0	0	0	0	0	0	0	0
HMT553	Prevotella baroniae	0	0	0	0.0997615	0	0	0.0939704	0	0	0	0	0	0	0	0	0	0	0	0.0603938	0	0	0	0	0	0	0	0	0	0	0	0	0	0	0	0	0	0	0	0	0	0	0	0	0	1.52931
HMT556	Prevotella bivia	0	0	0	0	0	0	0	0	0	0	0	0	0	0	0	0	0	0	0	0	0	0	0	0	0	0	0	0	0	0	0	0	0	0	0	0	0	0	0	0	0	0.0595579	0	0	0
HMT557	Peptostreptococcaceae [XI][G-9] [Eubacterium] brachy	0	0	0	0	0.0886239	0	0	0	0.0504488	0	0.053912	0.174113	0	0.102414	0	0	0	0	0	0.138291	0	0	0	0	0.0906404	0.102754	0	0	0	0	0	0	0	0	0	0	0	0.0647879	0	0.151754	0.102345	0.107204	0.0653093	0	0
HMT559	Afipia broomeae	0	0	0	0	0	0	0	0	0	0	0	0	0	0	0	0	0	0	0	0	0	0	0	0	0	0	0	0	0	0	0	0	0	0	0	0	0	0	0	0	0	0	0	0	0
HMT560	Prevotella buccae	0	0	0	0	0	0	0	0	0	0	0	0	0	0	0.144695	0	0	0	0	0	0	0	0	0	0	0	0	0	0	0	0	0	0	0	0	0	0	0	0	0	0	0	0	0	0
HMT562	Prevotella buccalis	0	0	0	0	0	0	0	0	0	0	0	0	0	0	0	0	0	0	0	0	0	0	0	0	0	0	0	0	0	0	0	0	0	0	0	0	0	0	0	0	0	0	0	0	0
HMT563	Leptotrichia buccalis	0	0	0	0	0	0	0	0.0678751	0	0	0	0.13929	0	0	0	0	0	0	0	0.0737552	0	0	0	0	0.650539	0	0	0	0.239553	0.645889	0	0	0.644832	0	0	0	0.0851416	0	0	0	0	0	0	0	0
HMT569	Eggerthia catenaformis	0	0	0	0	0	0	0	0	0	0	0	0	0	0	0	0	0	0	0	0	0	0	0	0	0	0	0	0	0	0	0	0	0	0	0	0	0	0	0	0	0	0	0	0	0
HMT571	Burkholderia cepacia	0	0	0	0	0	0	0	0	0	0	0	0	0	0	0	0	0	0	0	0	0	0	0	0	0	0	0	0	0	0	0	0	0	0	0	0	0	0	0	0	0	0.119116	0	0	0
HMT574	Escherichia coli	0	0	0	0	0	0	0	0	0	0	0	0	0	0	0	0	0	0	0	0	0	0	0	0	0	0	0	0	0	0	0	0	0	0	0	0	0	0	0	0	0	0	0	0	0
HMT577	Eikenella corrodens	0.0585028	0	0.101633	0.682579	0.324954	0.234883	0	0.707032	0	0	0	0.754488	0	0	0	0.157327	0.170017	0	0	0.553164	0	0	0	0.283814	0.409177	0	0	0.0899084	0.0579565	0	0	0	0.477044	0	1.35052	0	0.296	1.08372	0	0	2.49805	0	0	0	0.135245
HMT579	Cryptobacterium curtum	0	0	0	0	0	0	0	0	0	0	0	0	0	0	0	0	0	0	0	0	0	0	0	0	0	0	0	0	0	0	0	0	0	0	0	0	0	0	0	0	0	0	0	0	0
HMT583	Prevotella dentalis	0	0	0.0542042	0.138616	0	0.154352	0	0	0.201795	0.269648	0	0	0	0.0819308	0	0	0.136014	0	0	0	0.189001	0	0	0	0	0	0	0	0	0	0	0	0.250037	1.23663	0	0	0.0744989	0	0	0.0520299	0	0.0857634	0	0	0
HMT590	Brevundimonas diminuta	0	0	0	0	0	0	0	0	0	0	0	0	0	0	0	0	0	0	0	0	0	0	0	0	0	0	0	0	0	0	0	0	0	0	0	0	0	0	0	0	0	0	0	0	0
HMT591	Corynebacterium diphtheriae	0	0	0	0	0	0	0	0	0	0	0	0	0	0	0	0	0	0	0	0	0	0	0	0	0	0	0	0	0	0	0	0	0	0	0	0	0	0	0	0	0	0.0857634	0	0	0
HMT595	Corynebacterium durum	0	0	0	0	0	0	0	0	0.067265	0	0	0	0	0	0	0	0	0	0.587833	0	0	0	0	0.085775	0	0	0	0	0	0	0	0	0	0	0	0	0	0	0	0	0	0.254114	0.139326	0	0
HMT596	Granulicatella elegans	0	0	0	0	0	0	0	0	0	0	0	0	0	0	0	0	0	0	0	0	0	0	0	0	0	0	0	0	0.109473	0	0	0	0	0	0	0	0	0	0	0	0	0	0	0	0
HMT597	Bradyrhizobium elkanii	0	0	0	0	0	0	0	0	0	0	0	0	0	0	0	0	0	0	0	0	0	0	0	0	0	0	0	0	0	0	0	0	0	0	0	0	0	0	0	0	0	0	0	0	0
HMT598	Neisseria elongata	0.0877542	0	0	0.136516	0	0.2223	0.0522058	6.9572	0	0	0	0.406263	0	0	0	0.0786637	0	0	0.120788	0	0	0	0	0	0	0	0	0	0.115913	0	0	0	0.509944	0	0	0.0525412	0	0	0	0	0	0	0	0	4.63994
HMT600	Prevotella enoeca	0	0	0	0	0	0	0	0	0	0	0	0	0	0	0	0	0	0	0	0	0	0	0	0	0	0	0	0	0	0	0	0	0	0	0	0	0	0	0	0	0	0	0	0	0
HMT602	Slackia exigua	0	0	0	0	0	0	0	0	0	0	0	0	0	0	0	0	0	0	0	0	0	0	0	0	0	0	0	0	0	0	0	0	0	0	0	0	0	0	0	0	0	0	0	0	0
HMT603	Bulleidia extructa	0	0	0	0	0	0	0	0	0	0	0	0	0	0	0	0	0	0	0	0	0	0	0	0	0	0.102754	0	0	0	0	0	0	0	0	0	0	0	0	0	0	0	0	0	0	0
HMT607	Mycoplasma fermentans	0	0	0	0	0	0	0	0	0	0	0	0	0	0	0	0	0	0	0	0	0	0	0	0	0	0	0	0	0	0	0	0	0	0	0	0	0	0	0	0	0	0	0	0	0
HMT608	Lactobacillus fermentum	0	0	0	0	0	0	0	0	0	0	0	0	0	0	0	0	0	0	0	0	0	0	0	0	0	0	0	0	0	0	0	0	0	0	0	0	0	0	0	0	0	0	0	0	0
HMT612	Pseudomonas fluorescens	0	0	0	0	0	0	0	0	0	0	0	0	0	0	0	0	0	0	0	0	0	0	0	0	0	0	0	0	0	0	0	0	0	0	0	0	0	0	0	0	0	0	0	0	0
HMT613	Tannerella forsythia	17.7263	8.62334	12.083	0.168019	3.54496	6.74449	6.03499	0.395938	12.5113	10.2466	8.71219	4.29478	5.14247	2.66275	2.60451	1.02263	9.861	3.74681	0	1.10633	8.47549	14.2383	4.57942	0.128663	1.30522	0	11.0541	4.13579	0	14.3747	0	2.71348	0.921189	6.47483	12.4596	0.0525412	4.56971	9.04674	0	21.6358	4.15227	10.5298	11.9908	8.87449	0.561786
HMT614	Lysinibacillus fusiformis	0	0	0	0	0	0	0	0	0	0	0	0	0	0	0	0	0	0	0	0	0	0	0	0	0	0	0	0	0	0	0	0	0	0	0	0	0	0	0	0	0	0	0	0	0
HMT619	Porphyromonas gingivalis	22.4358	29.661	15.0643	0	2.49624	0	16.4553	1.01813	21.6425	13.8869	43.906	5.68768	13.5655	0	39.9358	0.353987	10.4561	0	0	5.07067	25.4855	6.64453	5.64394	0	0	0	0	23.4661	0.106254	13.4823	0	36.5906	8.17555	22.6327	0	0.105082	0.858068	0	0	19.0957	2.46463	9.26721	15.413	0	20.5468
HMT623	Campylobacter gracilis	0	0.138162	0.255964	0	0.925628	0.0782943	0.0696077	0.754167	0.26906	0	0.718827	1.62505	0.118218	0	0	0	0	0.249787	0.120788	0	0	0	0.107121	0	0.44198	0	0.147684	0	0	0.0971261	4.50218	0	0.350929	0	0.232347	0.525412	1.50772	0	0	0	0.579257	0.0794106	0	0.0745756	0.374524
HMT627	Capnocytophaga haemolytica	0	0	0	0	0	0	0	0	0.0504488	0	0	0	0	0	0	0	0	0	0	0	0	0	0	0	0	0	0	0	0	0	0	0	0	0	0	0	0	0	0	0	0	0	0	0	0
HMT630	Bacteroides heparinolyticus	0	0	0	0	0.0506423	0	0	0	0	0	0	0	0	0	0.0826828	0	0	0	0	0	0	0	0	0	0	0	0	0	0	0	0	0	0	0	0	0	0	0	0	0	0	0	0	0	0
HMT632	Mycoplasma hominis	0	0	0	0	0	0	0	0	0	0	0	0	0	0	0	0	0	0	0	0	0	0	0	0	0	0	0	0	0	0	0	0	0	0	0	0	0	0	0	0	0	0	0	0	0
HMT633	Cardiobacterium hominis	0	0	0	0	0	0	0	0.188542	0	0	0	0.851218	0	0	0	0	0	0	0.241575	0	0	0	0	0.287599	0	0	0	0	0	0	0	0	0	0	0	0	0	0	0	0	0	0	0	0	0.152584
HMT635	Johnsonella ignava	0	0	0	0	0	0	0	0	0	0	0	0	0	0	0	0	0	0	0	0	0	0	0	0	0	0.164407	0	0	0	0	1.24548	0	0	0	0	0	0	0	0	0	0	0	0	0	0
HMT636	Bosea vestrisii	0	0	0	0	0	0	0	0	0	0	0	0	0	0	0	0	0	0	0	0	0	0	0	0	0	0.0548024	0	0	0.0643961	0	0	0	0	0	0	0	0	0	0	0	0	0.365289	0	0	0
HMT643	Prevotella intermedia	0	1.66805	3.67008	11.7561	15.1399	2.6634	11.8403	4.49672	3.22872	0.876356	0	1.74113	1.95059	3.07241	3.90676	13.0188	0	12.9265	0	8.02088	0	0	10.8259	0.287599	0.207178	7.09006	8.48444	0.0899084	0	0.746657	0	0	0.0657992	0	0.217826	0	0.771596	1.00127	0	0.711797	1.19054	2.63246	0	0.0559317	0.686627
HMT646	Kingella kingae	0	0	0	0	0	0	0	0	0	0	0	0	0	0	0	0	0	0	0	0	0	0	0	0	0	0.102754	0	0	0	0	0	0	0	0	0	0	0	0	0	0	0	0	0	0	0
HMT652	Afipia sp. genosp. 4	0	0	0	0	0	0	0	0	0	0	0	0	0	0	0	0	0	0	0	0	0	0	0	0	0	0	0	0	0	0	0	0	0	0	0	0	0	0	0	0	0	0	0	0	0
HMT653	Treponema lecithinolyticum	0	0	0.271021	0.0787591	0.45789	6.00629	0	0	4.99443	0.606708	0	0.4643	1.41861	1.43379	0	0	4.59047	0	0	1.38291	0	0	1.82775	0	0.347023	0	0	0.0899084	0	0.267097	0	0.148911	0.723791	0	1.17626	0.919471	0	0.61254	0	4.1371	3.52149	0	0	0	0.124841
HMT654	Eggerthella lenta	0	0	0	0	0	0	0	0	0	0	0	0.0773834	0	0	0	0	0	0	0.0563676	0	0	0	0	0	0	0	0	0	0.193188	0	0.0553546	0	0	0	0	0	0	0	0	0	0	0.174703	0	0	0
HMT655	Eubacterium limosum	0	0	0	0	0	0	0	0	0	0	0	0	0	0	0	0	0	0	0	0	0	0	0	0	0	0	0	0	0	0	0	0	0	0	0	0	0	0	0	0	0	0	0	0	0
HMT659	Mesorhizobium loti	0	0	0	0	0	0	0	0	0	0	0	0	0	0	0	0	0	0	0	0	0	0	0	0	0	0	0	0	0	0	0	0	0	0	0	0	0	0	0	0	0	0	0	0	0
HMT660	Defluvibacter lusatiensis	0	0	0	0	0	0	0	0	0	0	0	0	0	0	0	0	0	0	0	0	0	0	0	0	0	0	0	0	0	0	0	0	0	0	0	0	0	0	0	0	0	0	0	0	0
HMT662	Finegoldia magna	0	0	0	0	0	0	0	0	0	0	0	0	0	0	0	0	0	0	0	0	0	0	0	0	0	0	0	0	0	0	0	0	0	0	0	0	0	0	0	0	0	0	0	0	0
HMT663	Stenotrophomonas maltophilia	0	0	0	0	0	0	0	0	0	0	0	0	0	0	0	0	0	0	0	0	0	0	0	0	0	0	0	0	0	0	0	0	0	0	0	0	0	0	0	0	0	0.0833811	0	0	0
HMT665	Prevotella marshii	0	0	0	0	0	0	0	0	0	0	0	0	0	0	0	0	0	0	0	0	0	0	0	0	0	0	0	0	0	0	0	0	0	0	0	0	0	0	0	0	0	0	0	0	0
HMT666	Corynebacterium matrucHMTii	0.0780037	0	0	0	0.590826	0	0.111372	1.20667	0.80718	0.0898827	0.977605	3.48225	0	0	0	0	0	0	0.59186	0	0	0	0.0535605	0	1.7144	0	0	0	0.49263	0.0546335	0	0	0.148048	0	0	0	0.186247	0	0	0	0.217221	3.68465	0.487643	0	0.596464
HMT673	Peptostreptococcaceae [XI][G-6] [Eubacterium] minutum	0	0	0	0	0	0	0	0	0	0	0	0	0	0	0	0	0	0.0749362	0	0	0	0	0	0	0	0	0	0	0	0	0	0	0	0	0	0	0	0	0	0	0	0	0	0	0
HMT674	Atopobium minutum	0	0	0	0	0	0	0	0	0	0	0	0	0	0	0	0	0	0	0	0	0	0	0	0	0	0	0	0	0	0	0	0	0	0	0	0	0	0	0	0	0	0	0	0	0
HMT676	Proteus mirabilis	0	0	0	0	0	0	0	0	0	0	0	0	0	0	0	0	0	0	0	0	0	0	0	0	0	0	0	0	0	0	0	0	0	0	0	0	0	0	0	0	0	0	0	0	0
HMT678	Solobacterium moorei	0	0	0	0	0	0	0	0	0	0	0	0	0	0	0	0	0	0	0	0	0	0	0	0	0	0	0	0	0	0	0	0	0	0	0	0	0	0	0	0	0	0	0	0	0
HMT681	Rothia mucilaginosa	0	0	0	0.0700081	0	0	0	0	0	0	0	0	0	0	0	0	0	0	0	0	0	0	0	0	0	0	0	0	0	0	0	0	0	0	0	0	0	0	0	0	0	0.174703	0	0	0
HMT683	Simonsiella muelleri	0	0	0	0	0	0	0	0	0	0	0	0.0580376	0	0	0	0	0	0	0	0	0	0	0	0	0	0	0	0	0	0	0	0	0	0	0	0	0	0	0	0	0	0	0	0	0
HMT684	Mitsuokella multacida	0	0	0	0	0	0	0	0	0	0	0	0	0	0	0	0	0	0	0	0	0	0	0	0	0	0	0	0	0	0	0	0	0	0	0	0	0	0	0	0	0	0	0	0	0
HMT685	Prevotella multiformis	0	0	0	0	0	0	0	0	0	0	0	0	0	0	0	0	0	0	0	0	0	0	0	0	0	0	0	0	0	0	0	0	0.082249	0	0	0.499141	0	0	0	0	0	0	0	0	0
HMT686	Streptococcus mutans	0	0	0	0	0	0	0	0	0	0	0	0	0	0	0	0	0	0	0	0	0	0	0	0	0	0	0	0	0	0	0	0	0	0	0	0	0	0	0	0	0	0	0	0	0
HMT693	Prevotella nigrescens	0	0	0	0.0787591	0	0.297798	0	0	0.958527	0	0.215648	0.174113	0	0	0	0	0	0.374681	0	0	0	0	0	0	0	0	0	0	0	0	0	0	0.444145	0.554152	0	1.20845	0.0698427	0	0	0	0	0	0	0	0
HMT694	Peptostreptococcaceae [XI][G-6] [Eubacterium] nodatum	0	0	0	0	0	0	0	0	0.100898	0.134824	0.0862593	0.162505	0	0	0	0	0	0.149872	0	0	0	0	0	0	0	0	0.106332	0	0	0.114123	0	0	0	0	0	0	0	0	0	0.115622	0	0.233467	0.146293	0	0
HMT700	Capnocytophaga ochracea	0	0	0	0	0	0	0	0.4525	0	0	0	0	0	0	0	0	0	0	0.597899	0	0	0	0	0	0.0517945	0	0	0	0	0	5.28637	0	0	0	0	0.0525412	0	0	0	0	0	0	0	0	0
HMT703	Desulfomicrobium orale	0	0	0	0	0	0	0	0	0	0	0	0	0	0	0	0	0	0	0	0	0	0	0	0	0	0	0	0	0.0579565	0	0	4.15295	0	0	0	0	0	0	0	0	0	0	0	0	0
HMT704	Mycoplasma orale	0	0	0	0	0	0	0	0	0	0	0	0	0	0	0	0	0	0	0	0	0	0	0	0	0	0	0	0	0	0	0	0	0	0	0	0	0	0	0	0	0	0	0	0	0
HMT705	Prevotella oralis	0	0	0	0	0	0	0	0	0.201795	0	0	0.154767	0	0	0	0	0	0	0	0.122925	0	0	0	0	0	0	0	0	0	0	0	0	0	0	0	0	0	0	0	0	0	0	0	0	0.235811
HMT706	Kingella oralis	0.263263	0	0.146803	0	0	0	0	0	0.100898	0	0	0.23215	0	0	0	0	0	0	0.483151	0	0	0	0	1.32068	0.0517945	0	0	0.0899084	0	0	0	0	0	0	0	0.157624	0	0	0	0	0	0.22632	0	0	0
HMT711	Moraxella osloensis	0	0	0	0	0	0	0	0	0	0	0	0	0	0	0	0	0	0	0	0	0	0	0	0	0	0	0	0	0	0	0	0	0	0	0	0	0	0	0	0	0	0	0	0	0
HMT714	Prevotella pallens	0	0	0	0.0840097	0	0	0	0	0	0	0	0	0	0	0	0	0	0	0	0	0	0	0	0	0	0.11303	0	0	0.0869347	0	0	0	0	0	0	0.0525412	0	0	0	0	0	0	0	0	0
HMT717	Variovorax paradoxus	0	0	0	0	0	0	0	0	0	0	0	0	0	0	0	0	0	0	0	0	0	0	0	0	0	0.328814	0	0	0.115913	0	0	0	0	0	0	0	0	0	0	0	0	0.0714695	0	0	0
HMT718	Haemophilus parainfluenzae	0	0.183654	0	1.83071	0	0	0.0556862	0	0	0	0	0	0	0	0	0	0	0	0.59186	0	0	0	0	0.123617	0	0.390467	0	0	2.78835	0	0	0	0	0	0	0.245192	0	0	18.2593	0	0	0.722636	0.0522474	0	0.0693563
HMT723	Atopobium parvulum	0	0	0	0	0	0	0	0	0	0	0	0	0	0	0	0	0	0	0	0	0	0	0	0	0	0	0	0	0	0	0	0	0	0	0	0	0	0	0	0	0	0	0	0	0
HMT724	Treponema parvum	0	0.0808754	0.0903404	0	0	0	0.062647	0	0.151346	0.202236	0	0.116075	0	0	0	0	0.0850087	0	0	0	0	0.142383	0	0	0.388459	0	0	0	0	0	0	0	0	0.204161	0	0	0	0.0588981	0	0	0	0	0.156742	0.0745756	0
HMT725	Treponema pectinovorum	0	0	0	0	0	0	0	0	0	0	0	0	0	0	0	0	0	0	0	0	0	0	0	0	0	0	0	0	0	0	0	0	0	0	0	0	0	0	0	0	0	0	0	0	0
HMT733	Chlamydophila pneumoniae	0	0	0	0	0	0	0	0	0	0	0	0	0	0	0	0	0	0	0	0	0	0	0	0	0	0	0	0	0.0772753	0	0	0	0	0	0	0	0	0	0	0	0	0	0	0	0
HMT736	Dialister pneumosintes	0	0	0	0	0	0	0	0	0.0576557	0	0	0	0	0	0	0	0	0	0	0	0.320626	0.135603	0.0573862	0	0.0680728	0.375788	0	0	0	0	0	0	0	2.24994	0	0.2552	0	0	0	0	0	0	0	0	0.0713379
HMT740	Pseudomonas pseudoalcaligenes	0	0	0	0.0997615	0	0	0	0	0.0504488	0	0	0	0	0	0	0	0	0	0	0	0	0	0	0	0	0	0	0	0	0	0	0	0	0	0	0	0	0	0	0	0	2.59673	0	0	0
HMT745	Streptococcus pyogenes	0	0	0	0	0	0	0	0	0	0	0	0	0	0	0	0	0	0	0	0	0	0	0	0	0	0	0	0	0	0	0	0	0	0	0	0	0	0	0	0	0	0	0	0	0
HMT746	Actinomyces radicidentis	0	0	0	0	0	0	0	0	0	0	0	0	0	0	0	0	0	0	0	0	0	0	0	0	0	0	0	0	0	0	0	0	0	0	0	0	0	0	0	0	0	0	0	0	0
HMT750	Atopobium rimae	0	0	0	0	0	0	0	0	0	0	0	0	0	0	0	0	0	0	0	0	0	0	0	0	0	0	0	0	0	0	0	0	0	0	0	0	0	0	0	0	0	0	0	0	1.70616
HMT753	Cronobacter sakazakii	0	0	0	0	0	0	0	0	0	0	0	0	0	0	0	0	0	0	0	0	0	0	0	0	0	0	0	0	0	0	0	0	0	0	0	0	0	0	0	0	0	0	0	0	0
HMT754	Mycoplasma salivarium	0	0	0.451702	0	0.0590826	0	0	0	0	0	0.258778	0.4643	0	0	0	0	0	0	0	0	0	0	0	0	0	0.328814	0	0	0	0	0	0	0	0.116664	0	0	0.133034	0	0	0	1.73777	0	0.0522474	0	0
HMT756	Lactobacillus salivarius	0	0	0	0	0	0	0	0	0	0	0	0	0	0	0	0	0	0	0	0	0	0	0	0	0	0	0	0	0	0	0	0	0	0	0	0	0	0	0	0	0	0	0	0	0
HMT759	Peptostreptococcaceae [XI][G-5] [Eubacterium] saphenum	0.128706	0.102105	0.447185	0	0.0531744	0	0.538764	0	0	0.431437	0	0	0	0.204827	0	0	0	0.224809	0	0	0.0649689	0.265781	0.449908	0	0.787277	0	0	0.32367	0	0.111695	0	0	0	0	0	0	0.312629	0	0	0	0.0601536	0.0952927	0	0.126778	0
HMT775	Capnocytophaga sputigena	0	0	0	0.51981	0	1.14925	0	0.820157	0.0504488	0	0.0646945	0	0	0	0	0.117996	0	0	2.52446	0	0	0	0	0	0.056974	1.36663	0	0	3.44841	0	0	0	0	0	0	0	0	0	0	0	0	0.178674	0.0653093	0	0
HMT776	Campylobacter sputorum	0	0	0	0	0	0	0	0	0	0	0	0	0	0	0	0	0	0	0	0	0	0	0	0	0	0	0	0	0	0	0	0	0	0	0	0	0	0	0	0	0	0	0	0	0
HMT777	Jonquetella anthropi	0	0	0	0	0	0	0	0	0	0	0	0	0	0	0	0	0	0	0	0	0	0	0	0	0	0	0	0	0	0	0	0	0	0	0	0	0	0	0	0	0	0	0	0	0
HMT780	Veillonella sp.	0	0	0	0	0	0	0	0	0	0	0	0	0	0	0	0	0	0	0	0	0	0	0	0	0	0	0	0	0	0	0	0	0	0	0	0	0	0	0	0	0	0	0	0	0
HMT781	Prevotella saccharolytica	0	0	0	0	0	0	0	0	0	0	0	0	0	0	0	0	0	0	0	0	0	0	0	0	0	0.972742	0	0	0.103034	0.113314	0	0	0.219331	0	0	0	0	0	0	0	0	0	0	0	0
HMT782	Prevotella fusca	0	0	0.112925	0	0.147707	0.775952	0	0	0	0	0	0	0	0	0.434085	0	0	1.12404	0	0.645358	0	0	0	0.0718997	0	0	0	0	0	0	0	0	0	0	0	0.0525412	0	0	0	0	0	0	0	0	0
HMT786	Paenibacillus phoenicis	0	0	0	0	0	0	0	0	0	0	0	0	0	0	0	0	0	0	0	0	0	0	0	0	0	0	0	0	0	0	0	0	0	0	0	0	0	0	0	0	0	0	0	0	0
HMT787	Bacteroides pyogenes	0	0	0	0	0	0	0	0	0	0	0	0	0	0	0	0	0	0	0	0	0	0	0	0	0	0	0	0	0	0	0	0	0	0	0	0	0	0	0	0	0	0	0	0	0
HMT790	Peptoniphilaceae [G-2] sp.	0	0	0	0	0	0	0	0	0	0	0	0	0	0	0	0	0	0	0	0	0	0	0	0	0	0	0	0	0	0	0	0	0	0	0.116174	0	0	0.376948	0	0	0	0	0	0	0
HMT794	Prevotella multisaccharivorax	0	0	0	0	0	0	0	0	0	0	0	0	0	0	0	0	0	0	0	0	0	0	0	0	0	0	0	0	0	0	0	0	0	0	0	0	0	0	0	0	0	0	0	0	0
HMT795	Prevotella shahii	0	0	0	0	0	0	0	0	0	0	0	0	0	0	0	0	0	0	0	0	0	0	0	0	0	0	0	0	0	0	0	0	0	0	0	0	0	0	0	0	0	0	0	0	0
HMT804	Lactococcus lactis	0	0	0	0	0	0	0	0	0	0	0	0	0	0	0	0	0	0	0	0	0	0	0	0	0	0	0	0	0	0	0	0	0	0	0	0	0	0	0	0	0	0	0	0	0
HMT805	Treponema pallidum	0	0	0	0	0	0	0	0	0	0	0	0	0	0	0	0	0	0	0	0	0	0	0	0	0	0	0	0	0	0	0	0	0	0	0	0	0	0	0	0	0	0	0	0	0
HMT806	Olsenella profusa	0	0	0	0	0	0	0	0	0	0	0	0	0	0	0	0	0	0	0	0	0	0	0	0	0	0	0	0	0	0	0	0	0	0	0	0	0	0	0	0	0	0	0	0	0
HMT807	Olsenella sp.	0	0	0	0	0	0	0	0	0	0	0	0	0	0	0	0	0	0	0	0	0	0	0	0	0	0	0	0	0	0	0	0	0	0	0	0	0	0	0	0	0	0	0	0	0
HMT809	Olsenella sp.	0	0	0	0	0	0	0	0	0	0	0	0	0	0	0	0	0	0	0	0	0	0	0	0	0	0	0	0	0	0	0	0	0	0	0	0	0	0	0	0	0	0	0	0	0
HMT810	Atopobium sp.	0	0	0	0	0	0	0	0	0	0	0	0	0	0	0	0	0	0	0	0	0	0	0	0	0	0	0	0	0	0	0	0	0	0	0	0	0	0	0	0	0	0	0	0	0
HMT811	Arcanobacterium haemolyticum	0	0	0	0	0	0	0	0	0	0	0	0	0	0	0	0	0	0	0	0	0	0	0	0	0	0	0	0	0	0	0	0	0	0	0	0	0	0	0	0	0	0	0	0	0
HMT812	Helicobacter pylori	0	0	0	0	0	0	0	0	0	0	0	0	0	0	0	0	0	0	0	0	0	0	0	0	0	0	0	0	0	0	0	0	0	0	0	0	0	0	0	0	0	0	0	0	0
HMT813	Dolosigranulum pigrum	0	0	0	0	0	0	0	0	0	0	0	0	0	0	0	0	0	0	0	0	0	0	0	0	0	0	0	0	0	0	0	0	0	0	0	0	0	0	0	0	0	0	0	0	0
HMT814	Atopobium vaginae	0	0	0	0	0	0	0	0	0	0	0	0	0	0	0	0	0	0	0	0	0	0	0	0	0	0	0	0	0	0	0	0	0	0	0	0	0	0	0	0	0	0	0	0	0
HMT816	Lactobacillus coleohominis	0	0	0	0	0	0	0	0	0	0	0	0	0	0	0	0	0	0	0	0	0	0	0	0	0	0	0	0	0	0	0	0	0	0	0	0	0	0	0	0	0	0	0	0	0
HMT820	Prevotella sp.	0	0	0	0	0	0	0	0	0	0.067412	0	0	0	0	0	0	0	0	0	0	0	0	0	0	0.393638	0	0	0	0	0	0	0	0	0	0	0	0	0	0	0	0	0	0	0	0
HMT821	Haemophilus ducreyi	0	0	0	0	0	0	0	0	0	0	0	0	0	0	0	0	0	0	0	0	0	0	0	0	0	0	0	0	0	0	0	0	0	0	0	0	0	0	0	0	0	0	0	0	0
HMT824	Bacillus anthracis	0	0	0	0	0	0	0	0	0	0	0	0	0	0	0	0	0	0	0	0	0	0	0	0	0	0	0	0	0	0	0	0	0	0	0	0	0	0	0	0	0	0	0	0	0
HMT825	Listeria monocytogenes	0	0	0	0	0	0	0	0	0	0	0	0	0	0	0	0	0	0	0	0	0	0	0	0	0	0	0	0	0	0	0	0	0	0	0	0	0	0	0	0	0	0	0	0	0
HMT827	Yersinia pestis	0	0	0	0	0	0	0	0	0	0	0	0	0	0	0	0	0	0	0	0	0	0	0	0	0	0	0	0	0	0	0	0	0	0	0	0	0	0	0	0	0	0	0.0712465	0	0
HMT829	Gardnerella vaginalis	0	0	0	0	0	0	0	0	0	0	0	0	0	0	0	0	0	0	0	0	0	0	0	0	0	0	0	0	0	0	0	0	0	0	0	0	0	0	0	0	0	0	0	0	0
HMT830	Mobiluncus mulieris	0	0	0	0	0	0	0	0	0	0	0	0	0	0	0	0	0	0	0	0	0	0	0	0	0	0	0	0	0	0	0	0	0	0	0	0	0	0	0	0	0	0	0	0	0
HMT831	Alloiococcus otitis	0	0	0	0	0	0	0	0	0	0	0	0	0	0	0	0	0	0	0	0	0	0	0	0	0	0	0	0	0	0	0	0	0	0	0	0	0	0	0	0	0	0	0	0	0
HMT832	Turicella otitidis	0	0	0	0	0	0	0	0	0	0	0	0	0	0	0	0	0	0	0	0	0	0	0	0	0	0	0	0	0	0	0	0	0	0	0	0	0	0	0	0	0	0	0	0	0
HMT833	Moraxella catarrhalis	0	0	0	0	0	0	0	0	0	0	0	0	0	0	0	0	0	0	0	0	0	0	0	0	0	0	0	0	0	0	0	0	0	0	0	0	0	0	0	0	0	0	0	0	0
HMT836	Peptoniphilus lacrimalis	0	0	0	0	0	0	0	0	0	0	0	0	0	0	0	0	0	0	0	0	0	0	0	0	0	0	0	0	0	0	0	0	0	0	0	0	0	0	0	0	0	0	0	0	0
HMT837	Sneathia sanguinegens	0	0	0	0	0	0	0	0	0	0	0	0	0	0	0	0	0	0	0	0	0	0	0	0	0	0	0	0	0	0	0	0	0	0	0	0	0	0	0	0	0	0	0	0	0
HMT838	Lactobacillus iners	0	0	0	0	0	0	0	0	0	0	0	0	0	0	0	0	0	0	0	0	0	0	0	0	0	0	0	0	0	0	0	0	0	0	0	0	0	0	0	0	0	0	0	0	0
HMT839	Lactobacillus jensenii	0	0	0	0	0	0	0	0	0	0	0	0	0	0	0	0	0	0	0	0	0	0	0	0	0	0	0	0	0	0	0	0	0	0	0	0	0	0	0	0	0	0	0	0	0
HMT840	Peptoniphilus indolicus	0	0	0	0	0	0	0	0	0	0	0	0	0	0	0	0	0	0	0	0	0	0	0	0	0	0	0	0	0	0	0	0	0	0	0	0	0	0	0	0	0	0	0	0	0
HMT841	Megasphaera sp.	0	0	0	0	0	0	0	0	0	0	0	0	0	0	0	0	0	0	0	0	0	0	0	0	0	0	0	0	0	0	0	0	0	0	0	0	0	0	0	0	0	0	0	0	0
HMT842	Campylobacter ureolyticus	0	0	0	0	0	0	0	0	0	0	0	0	0	0	0	0	0	0	0	0	0	0	0	0	0	0	0	0	0	0	0	0	0	0	0	0	0	0	0	0	0	0	0	0	0
HMT843	Dialister micraerophilus	0	0	0	0	0	0	0	0	0	0	0	0	0	0	0	0	0	0	0	0	0	0	0	0	0	0	0	0	0	0	0	0	0	0	0	0	0	0	0	0	0	0	0	0	0
HMT844	Sneathia amnii [NVP]	0	0	0.225851	0	0.85079	0	0	0	0	0	0	0.4643	0	0	0	0	0	0.899235	0.0676411	0	0	0	0	0.145313	0	0	0	0.143853	0	0.490487	0	0.787571	0.250037	0	0.104556	0	0	0	0	0	5.20997	0.905281	0	0	0
HMT845	Leptotrichia goodfellowii	0	0	0	0	0	0	0	0.0678751	0	0	0	0.0928601	0	0	0	0	0	0	0	0	0	0	0	0	0	0	0	0	0	0	0	0	0	0	0	0	0	0	0	0	0	0.0571756	0	0	0
HMT847	Leptotrichia sp.	0	0	0	0	0	0	0	0	0	0	0	0	0	0	0	0	0	0	0	0	0	0	0	0	0	0	0	0	0	0	0	0	0	0	0	0.0630494	0	0	0	0	0	0	0	0	0
HMT848	Actinobaculum sp.	0	0	0	0	0	0	0	0	0	0	0	0	0	0	0	0	0	0	0	0	0	0	0	0	0	0	0	0	0	0	0	0	0	0	0	0	0	0	0	0	0	0	0	0	0
HMT853	Corynebacterium urealyticum	0	0	0	0	0	0	0	0	0	0	0	0	0	0	0	0	0	0	0	0	0	0	0	0	0	0	0	0	0	0	0	0	0	0	0	0	0	0	0	0	0	0.0635285	0	0	0
HMT855	Kytococcus sedentarius	0.0585028	0	0	0	0	0	0	0	0	0	0	0	0	0	0	0	0	0	0	0	0	0	0	0	0	0	0	0	0.0579565	0	0	0	0	0.0583318	0	0	0	0	0	0	0	0	0	0	0
HMT856	Sanguibacter keddieii	0	0	0	0	0	0	0	0	0	0	0	0	0	0	0	0	0	0	0	0	0	0	0	0	0	0	0	0	0.106254	0	0	0	0	0	0	0	0	0	0	0	0	0	0	0	0
HMT857	Rhodobacter capsulatus	0	0	0	0	0	0	0	0	0	0	0	0	0	0	0	0	0	0	0	0	0	0	0	0	0	0	0	0	0	0	0	0	0	0	0	0	0	0	0	0	0	0	0	0	0
HMT858	Comamonas testosteroni	0.0780037	0	0	0	0	0	0	0	0.067265	0	0	0	0	0	0	0	0	0	0	0	0	0	0	0	0	0	0	0	0	0	0	0	0	0	0.116174	0	0	0.0628246	0	0	0	0	0	0	0
HMT859	Anaerococcus lactolyticus	0	0	0	0	0	0	0	0	0	0	0	0	0	0	0	0	0	0	0	0	0	0	0	0	0	0	0	0	0	0	0	0	0	0	0	0	0	0	0	0	0	0	0	0	0
HMT866	Actinomyces graevenitzii	0	0	0	0	0	0	0	0	0	0	0	0	0	0	0	0	0	0	0	0	0	0	0	0	0	0	0	0	0.115913	0	0	0	0	0	0	0	0	0	0	0	0	0	0	0	0
HMT870	TM7 [G-6] sp.	0	0	0	0	0	0	0	0	0	0	0	0	0	0	0	0	0	0	0	0	0	0	0	0	0	0	0	0	0	0	0	0	0	0	0	0	0	0	0	0	0	0	0	0	0
HMT871	GN02 [G-1] sp.	0	0	0	0	0	0	0	0	0	0	0	0	0	0	0	0	0	0	0	0	0	0	0	0	0	0	0	0	0	0	0	0	0	0	0	0	0	0	0	0	0	0	0	0	0
HMT872	GN02 [G-1] sp.	0	0	0	0	0	0	0	0	0	0	0	0	0	0	0	0	0	0	0	0	0	0	0	0	0	0	0	0	0	0	0	0	0	0	0	0	0	0	0	0	0	0	0	0	0
HMT873	GN02 [G-2] sp.	0	0	0	0	0	0	0	0	0	0	0	0	0	0	0	0	0	0	0	0	0	0	0	0	0	0	0	0	0	0	0	0	0	0	0	0	0	0	0	0	0	0	0	0	0
HMT874	SR1 [G-1] sp.	0	0	0	0	0	0	0	0	0	0	0	0	0	0	0	0	0	0	0	0	0	0	0	0	0	0	0	0	0	0	0	0	0	0	0	0	0	0	0	0	0	0	0	0	0
HMT875	SR1 [G-1] sp.	0	0	0	0	0	0	0	0	0	0	0	0	0	0	0	0	0	0	0	0	0	0	0	0	0	0	0	0	0	0	0	0	0	0	0	0	0	0	0	0	0	0	0	0	0
HMT876	Clostridiales [F-3][G-1] sp.	0	0	0	0	0	0	0	0	0	0	0	0	0	0	0	0	0	0	0	0	0	0	0	0	0	0	0	0	0	0	0	0	0	0	0	0	0	0	0	0	0	0	0	0	0
HMT878	Capnocytophaga sp.	0	0	0	0	0	0	0	0	0	0	0	0	0	0	0	0	0	0	0	0	0	0	0	0	0	0	0	0	0	0	0	0	0	0	0	0	0	0	0	0	0	0	0	0	0
HMT888	Actinomyces dentalis	0	0	0	0	0	0	0	0	0	0	0	0	0	0	0	0	0	0	0	0	0	0	0	0	0	0	0	0	0	0	0	0	0	0	0	0	0	0	0	0	0	0	0	0	0
HMT894	Ottowia sp.	0	0	0	0	0	0	0	0	0	0	0	0	0	0	0	0	0	0	0.120788	0	0	0	0	0	0	0	0	0	0	0	0	0	0	0	0	0	0	0	0	0	0	0	0	0	0
HMT896	Actinomyces sp.	0	0	0	0	0	0	0	0	0	0	0	0	0	0	0	0	0	0	0	0	0	0	0	0	0	0	0	0	0	0	0	0	0	0	0	0	0	0	0	0	0	0	0	0	0
HMT897	Actinomyces sp.	0	0	0	0	0	0	0	0	0	0	0	0	0	0	0	0	0	0	0	0	0	0	0	0	0	0	0	0	0	0	0	0	0	0	0	0	0	0	0	0	0	0	0	0	0
HMT899	Bacteroidetes [G-3] sp.	0	0	0	0	0	0	0	0	0	0	0	0	0	0	0	0	0	0	0	0	0	0	0	0	0	0	0	0	0	0	0	0	0	0	0	0	0	0	0	0	0	0	0	0	0
HMT901	Capnocytophaga sp.	0	0	0	0	0	0	0	0	0	0	0	0	0	0	0	0	0	0	0	0	0	0	0	0	0	0	0	0	0	0	0	0	0	0	0	0	0	0	0	0	0	0	0	0	0
HMT904	Erysipelotrichaceae [G-1] sp.	0	0	0	0	0	0	0	0	0	0	0	0	0	0	0	0	0	0	0	0	0	0	0	0	0	0	0	0	0	0	0	0	0	0	0	0	0	0	0	0	0	0	0	0	0
HMT905	Erysipelotrichaceae [G-1] sp.	0	0	0	0	0	0	0	0	0	0	0	0	0	0	0	0	0	0	0	0	0	0	0	0	0	0	0	0	0	0	0	0	0	0	0	0	0	0	0	0	0	0	0	0	0
HMT906	Mollicutes [G-2] sp.	0	0	0	0	0	0	0	0	0	0	0	0	0	0	0	0	0	0	0	0	0	0	0	0	0	0	0	0	0	0	0	0	0	0	0	0	0	0	0	0	0	0	0	0	0
HMT911	Bacteroidetes [G-7] sp.	0	0	0	0	0	0	0	0	0	0	0	0	0	0	0	0	0	0	0	0	0	0	0	0	0	0	0	0	0	0	0	0	0	0	0	0	0	0	0	0	0	0	0	0	0
HMT915	Propionibacterium sp.	0	0	0	0	0	0	0	0	0	0	0	0.23215	0	0	0	0	0	0	0	0	0	0	0	0	0	0	0	0	0.0772753	0	0	0	0	0	0	0	0	0	0	0	0	0	0	0	0
HMT917	Veillonella sp.	0	0	0	0	0	0	0	0	0	0	0	0	0	0	0	0	0	0	0	0	0	0	0	0	0	0	0	0	0	0	0	0	0	0	0	0	0	0	0	0	0	0	0	0	0
HMT921	Paenibacillus glucanolyticus	0	0	0	0	0	0	0	0	0	0	0	0	0	0	0	0	0	0	0	0	0	0	0	0	0	0	0	0	0	0	0	0	0	0	0	0	0	0	0	0	0	0	0	0	0
HMT927	Treponema sp.	0	0.702605	1.37769	0	0	0	0	0	0	0	0	0	0	0	0	0	0	0	0	0	0	0	0	0	0	0	0	0.0899084	0	0	0	0	0	16.7412	0	0	0	0	0	0	1.50802	0	0	0	0
HMT929	Peptoniphilaceae [G-3] sp.	0	0	0	0	0	0	0	0	0	0	0	0	0	0	0	0	0	0	0	0	0	0	0	0	0	0	0	0	0	0	0	0	0	0	0	0	0	0	0	0	0	0	0	0	0
HMT930	Porphyromonas sp.	0	0	0	0	0	0	0	0	0	0	0	0	0	0	0	0	0	0	0	0	0	0	0	0	0	0	0	0	0	0	0	0	0	0	0	0	0	0	0	0	0	0	0	0	0
HMT931	Bergeyella sp.	0	0	0	0	0	0	0	0	0	0	0	0	0	0	0	0	0	0	0	0	0	0	0	0	0	0	0	0	0	0	0	0	0	0	0	0	0	0	0	0	0	0	0	0	0
HMT932	Kingella sp.	0	0	0	0	0	0	0	0	0	0	0	0.0580376	0	0	0	0	0	0	0	0	0	0	0	0	0	0	0	0	0	0	0	0	0	0	0	0	0	0	0	0	0	0	0	0	0
HMT935	Fastidiosipila sanguinis	0	0	0	0	0	0	0	0	0	0	0	0	0	0	0	0	0	0	0	0	0	0	0	0	0	0	0	0	0	0	0	0	0	0	0	0	0	0	0	0	0	0	0	0	0
HMT939	Olsenella sp.	0	0	0	0	0	0	0	0	0	0	0	0	0	0	0	0	0	0	0	0	0	0	0	0	0	0	0	0	0	0	0	0	0	0	0	0	0	0	0	0	0	0	0	0	0
HMT942	Prevotella sp.	0	0	0	0	0	0	0	0	0	0	0	0	0	0	0	0	0	0	0	0	0	0	0	0	0	0	0	0	0	0	0	0	0	0	0	0	0	0	0	0	0	0	0	0	0
HMT943	Prevotella aurantiaca	0	0	0	0	0	0	0	0	0	0	0	0	0	0	0	0	0	0	0	0	0	0	0	0	0	0	0	0	0	0	0	0	0	0	0	0	0	0	0	0	0	0	0	0	0
HMT949	Aggregatibacter sp.	0	0	0	0	0	0	0	0	0	0	0	0	0	0	0	0	0	0	0	0	0	0	0	0	0	0	0	0	0.0837149	0	0	0	0	0	0	0	0	0	0	0	0	0	0	0	0
HMT950	Peptostreptococcaceae [XI][G-3] sp.	0	0	0	0	0	0	0	0	0	0	0	0	0	0	0	0	0	0	0	0	0	0	0	0	0	0	0	0	0	0	0	0	0	0	0	0	0	0	0	0	0	0	0	0	0
HMT708	Actinomyces oricola	0	0	0	0	0	0	0	0	0	0	0	0	0	0	0	0	0	0	0	0	0	0	0	0	0	0	0	0	0	0	0	0	0	0	0	0	0	0	0	0	0	0	0	0	0

## Sheet: HO
		HO1	HO10	HO11	HO12	HO13	HO14	HO15	HO16	HO17	HO2	HO3	HO4	HO5	HO6	HO7	HO8	HO9
CT1	Selenomonas noxia; S. infelix	0	0	0.264003	0.0978242	2.09787	0	0	0.138472	0.084401	0.262632	0	0	0	0	0	0	0
CT2	Streptococcus mitis; S. oralis	39.5443	42.3931	2.8201	1.91735	1.19878	0.0804657	16.3185	5.27061	22.8401	23.4883	0.776829	24.2399	60.53	0.778868	2.7401	30.3862	37.1052
CT3	Fusobacterium nucleatum	0.24291	0.0536621	17.5274	50.0703	31.2642	38.6879	4.51214	20.244	19.0132	22.1047	31.6281	6.78418	2.32319	5.16182	35.7048	3.06043	4.45757
CT4	Actinomyces naeslundii	0	0.321973	0	0.073042	0	0	0.0619644	0	0.0698226	0	0	0.220136	0.798596	0	0	0	0
CT5	Streptococcus parasanguinis	1.64322	0.737854	1.45812	0.36521	0.179817	0	0.327426	2.0416	0.147702	0.123883	0.249695	0.425262	0.362998	0.459476	0.428853	0.218123	0.26828
CT6	Veillonella dispar; V. parvula	6.63835	13.1472	17.428	0.821723	2.87707	0.120699	54.5076	1.00566	18.6776	1.15955	0.971037	40.7251	3.17624	5.10747	4.05323	0.167787	14.2807
CT7	Treponema vincentii	0	0	0	0.547815	4.31561	0	0	3.19871	0	0	0.56875	0	0	0	3.07408	0	0.412738
CT8	Porphyromonas pasteri; P. catoniae	0.0833515	0.134155	6.94343	8.26288	2.63732	0.0804657	1.03157	2.54443	0	0.123883	0.971037	0.400246	0	0.386632	1.20306	2.16445	0.103185
CT9	Actinomyces odontolyticus	0.142888	0.134155	0.170915	0	0	0.160931	0	0.072698	0.0671371	0.0693746	0.0832317	0.0500308	0	0.112067	0	0	0
CT10	Prevotella histicola	0.184564	0.670777	6.05681	0.73042	0.479512	0	0.665414	0.072698	0.0671371	0.267588	1.01265	0.100062	0	0.165299	0.432648	0	2.14624
CT11	Treponema socranskii	0	0	0	4.29122	1.91805	4.10375	0	1.8538	0	0.0825888	0.249695	0	0	0	0.129035	0	0.0825477
CT12	Fretibacterium sp.	0	0	0	1.76518	0.159837	14.001	0	0.870357	0	0	0.231199	0	0	0	0.440238	0	0
CT13	Aggregatibacter aphrophilus	0	0.0894369	0	0.0913026	0	0	0.150217	0	0.156653	3.89158	0.106352	2.08462	0	0	0	1.68905	0
CT14	Prevotella sp.	0	0	0.053411	0.182605	0.059939	0	0	0.0848144	0	0	0.221951	0	0	0	0	0	0
CT15	Parvimonas micra	0	0	0	0	0	0	0	0	0	0	0.388415	0	0	0	0.208734	0	0
CT16	Capnocytophaga sp.	0	0	0.566157	0	0.059939	0	0.133787	0	0	0.327052	0.423095	0.0500308	0.453748	0	0	0.184565	0
CT17	Selenomonas sp.	0	0	0	0	0	0	0	0	0	0	0	0	0	0	0	0	0
CT18	Lactobacillus vaginalis; L. panis	0	0	0	0	0	0	0	0	0	0	0	0	0	0	0	0	0
CT19	Lactobacillus brevis	0	0	0	0	0	0	0	0	0	0	0	0	0	0	0	0	0
CT20	Selenomonas artemidis	0	0	0.208303	0	0.239756	0	0.0668934	0	0.369254	0.921691	0	0	0	0.0560337	0	0	0
CT21	Selenomonas sputigena	0	0	0	0	0.119878	0.160931	0	0	0	0	0	0	0	0	0	0	0
CT22	Porphyromonas endodontalis	0	0	0	4.93034	0.659329	0.804657	0.0704141	0.514944	0	1.22892	3.27378	0	0	0	12.4253	0.302016	0.412738
CT23	Haemophilus haemolyticus	1.92502	0.223592	0.19584	0.0608684	0	0	0	0.193861	0	0.637586	0	0.617047	0.483998	0	0.392166	0.268459	1.54089
CT24	Haemophilus sputorum	0.198456	7.91516	0	0	0	0	0	0.0888531	0	0.373301	0	0.6504	0.0604997	0	0	0	0.921782
CT25	Neisseria flava; N. mucosa	22.8621	2.4148	0.956057	0.319559	4.915	0	2.87994	6.47618	0.255121	0.242811	0.0832317	0.100062	0.181499	7.76346	0.330179	0.570475	1.23821
CT26	Kingella denitrificans	0.428665	0	1.3513	0.182605	1.01896	0	0.563313	3.41075	0.0671371	0.173436	0	0.0750462	0	0.112067	0.0986741	2.08056	0.103185
CT27	Neisseria subflava	5.49524	0	0.213644	2.69343	0.419573	0	0.239408	1.9992	0	0.450935	0.624238	0.200123	0.453748	3.43486	1.48011	0.838934	0
CT28	Lachnoanaerobaculum orale	0	0	0	0	0	0	0	0	0	0	0	0	0	0.061637	0	0	0
CT29	Capnocytophaga sp.	0	0	0	0	0	0	0	0	0	0	0	0.300185	0	0	0	0	0
CT30	Veillonellaceae [G-1] sp.	0	0	0	0	0	0.120699	0	0.0848144	0	0	0	0	0	0	0	0	0
CT31	Capnocytophaga sp.	0	0	0.0801165	0	0.359634	0	0.084497	0	2.67206	0	0	0	0	0	0.584454	0.184565	0
CT32	Lactobacillus acidophilus; L. crispatus	0	0	0	0	0	0	0	0	0	0	0	0	0	0	0	0	0
CT33	Class Bacilli	0.385798	0.536621	0	0	0	0	0	0	0	0.0693746	0	0.0750462	0.0907496	47.581	0	0.0671147	0
CT34	Leptotrichia wadei	0	0	0	0.109563	0	0.0643725	0	0	0.38671	0	0	0	0	0.208445	0	0	0
CT35	Treponema sp.	0	0	0	0	0	0	0	0	0	0	0	0	0	0	0.0759031	0	0.0825477
CT36	Veillonellaceae [G-1] sp.	0	0	0	0	0.059939	0	0	0	0	0	0	0	0	0	0	0	0
CT37	Gemella morbillorum	0.750163	0.603699	0.331148	0.410862	0.239756	0	0.186597	1.01777	0.0537097	0.971244	0.187271	0.125077	0.0907496	0.0728438	0.307408	0.838934	1.13503
CT38	Peptostreptococcaceae [XI][G-7] sp.	0	0	0	0	0	0	0	0	0	0	0.208079	0	0	0	0	0	0
CT39	Staphylococcus aureus; S. epidermidis	0	0	0	0	0	0	0	0	0	0	0	0	0	0.454382	0	0	0
CT40	Veillonellaceae [G-1] sp.	0	0	0	0.0913026	0	0	0	0	0	0	0	0	0	0	0	0	0
CT41	Klebsiella pneumoniae	0	0	0	0	0	0	0	0	0	0	0	0	0	0	0	0	0
CT42	Treponema maltophilum	0	0	0	0.502164	0.59939	0.201164	0	0.43013	0	0	0.0762957	0	0	0	0.136626	0	0
CT43	Streptococcus gordonii; S. sanguinis	3.61388	14.0192	1.18038	0	0	0	1.34843	1.09653	1.67843	1.442	0.166463	2.45151	5.44498	0.344607	0.254276	1.76176	5.11795
CT44	Peptococcus sp.	0	0	0	0	0	0	0	0	0	0	0	0	0	0	0	0	0
CT45	Actinomyces georgiae	0	0	0	0	0	0	0.347376	0	0	0	0	0	0	0	0	0	0
CT46	Mogibacterium timidum	0	0	0	0	0	0	0	0	0	0	0.0566811	0	0	0	0	0	0
CT47	Aggregatibacter segnis	0	0	0.110383	0.0913026	0	0	0	0.0888531	0	0	0	0	0	0	0.303613	0.178972	0
CT48	Rothia dentocariosa	1.29393	3.13029	0	0	0.159837	0	0.112663	0.153474	8.93372	0	0	0	3.62998	0.407178	0	0	0.0825477
CT49	Granulicatella adiacens	0.696183	0.545565	0	0.0608684	0	0	0.285881	0.221325	0.27571	0.275516	0.0971037	1.09401	0.133099	0.282036	0.0571804	0.147652	0.365961
CT50	Treponema denticola	0	0	0	1.27824	0	6.92005	0	4.71326	0	0.138749	3.38476	0.0500308	0	0	1.45734	0	0.990572
CT51	Capnocytophaga granulosa	0	0.0670777	4.47762	0.182605	0.979004	0	1.6829	3.9681	0	0.290713	0	0	0.0907496	0	0.465539	8.8144	0
CT52	Lactobacillus rhamnosus	0	0	0	0	0	0	0	0	0	0	0	0	0	0	0	0	0
CT53	Tannerella sp.	0	0	0.373877	0.273908	0.959025	0	0.204201	2.04766	0	0	0.665854	0	0	0.431459	2.48962	0	0
CT54	Streptococcus anginosus	0	0	7.53629	0.273908	0.059939	0	0.707662	0	0.147702	0.257677	1.15137	0	0	0.0700421	0.204938	0.151008	0.350828
CT55	Porphyromonas asaccharolytica	0	0	0	0	0	0	0	0	0	0	0	0	0	0	0	0	0
CT56	Campylobacter rectus	0	0	2.50676	0.121737	1.19878	0	0	1.07432	0.0805646	0.898566	3.13506	0	0.120999	0.149423	1.35108	0.111858	0
CT57	Alloprevotella sp.	0	0	0	0	0	0	0	0	0	0	0	0	0.181499	0	0	0	0
CT58	Prevotella loescheii	0	0	0.380286	0	0	0.25749	0	0	0	0	0.0887805	0	0	0	0	0	0.115567
CT59	Haemophilus influenzae	0	0	0	0	0	0	0	0	0	0	0	0	0	0	0	0	0
CT60	Campylobacter concisus	0	0.0894369	0.569717	0	0.159837	0	0	0	1.33379	0	0.0554878	0.0667077	0.120999	0.646255	0.25301	0.0671147	0
CT61	Peptostreptococcus stomatis	0	0	0	0	0	0	0	0	0	0	0	0	0	0	0	0	0
CT62	Bifidobacterium dentium	0	0	0	0	0	0	0	0	0	0	0	0	0	0	0	0	0
CT63	Mycobacterium tuberculosis	0	0	0	0	0	0	0	0	0	0	0	0	0	0	0	0	0
CT64	Actinomyces gerencseriae	0	0	0	0	0	0	0	0	0	0	0	0	0	0	0	0	0
CT65	Catonella morbi	0	0	0	0	0	0	0	0	0	0	0	0	0	0	0	0	0
CT66	Streptococcus sobrinus	0	0	0	0	0	0	0	0	0	0	0	0	0	0	0	0	0
CT67	Neisseria gonorrhoeae	0	0	0	0	0	0	0	0	0	0	0	0	0	0	0	0	0
CT68	Pseudomonas aeruginosa	0	0	0	0	0	0	0	0	0	0	0	0	0	0	0	0	0
CT69	Desulfovibrio fairfieldensis	0	0	0	0	0	0	0	0	0	0	0	0	0	0	0	0	0
CT70	Fusobacterium necrophorum	0	0	0	0	0	0	0	0	0	0	0	0	0	0	0	0	0
CT71	Oribacterium parvum	0	0	0	0	0	0	0	0	0	0	0	0	0	0	0	0	0
CT72	Parascardovia denticolens	0	0	0	0	0	0	0	0	0	0	0	0	0	0	0	0	0
CT73	Acinetobacter baumannii	0	0	0	0	0	0	0	0	0	0	0.15307	0	0	0	0	0	0
CT74	Propionibacterium acnes	0	0	0	0	0	0	0	0	0	0	0	0	0	0.718777	0	0	0
CT75	Anaerococcus prevotii	0	0	0	0	0	0	0	0	0	0	0	0	0	0	0	0	0
CT76	Leptotrichia sp.	0	0	0	0	0.191805	0	0	0.0581584	0	0.218034	0	0	0	0	0	0	0
CT77	Leptotrichia hongkongensis	0	0	0.517019	1.46084	4.84307	0	0.0985798	0.0872376	0.456533	0.527247	0	0	0.435598	0.230859	0	0.214767	0
CT78	TM7 [G-1] sp.	0	0	0	0	0	0	0	0	0	0	0	0	0	0	0	0	0
CT79	Achromobacter xylosoxidans	0	0	0	0	0	0	0	0	0	0	0	0	0	0	0	0	0
CT80	Streptococcus vestibularis; S. salivarius	0.619183	0	0	0	0	0	0	0	0	0	0	0.116739	0.241999	0.283904	0	0	0.564076
CT81	Treponema sp.	0	0	0	0	0	0	0	0	0	0	0	0	0	0	0	0	0
CT82	Alloprevotella sp.	0.0612378	0	0	0	0.39731	0	0.109846	0.095546	0	0.940096	0	0.105779	0	0	0	0.0958781	0
CT83	Treponema sp.	0	0	0	0	0	0.0804657	0	0	0	0	0	0	0	0	0	0	0
CT84	Mogibacterium neglectum	0	0	0	0	0	0	0	0	0	0	0	0	0	0	0	0	0
CT85	Erythromicrobium ramosum	0	0	0	0	0	0	0	0	0	0	0	0	0	0	0	0	0
CT86	Bergeyella sp.	0	0	0.206523	0	0	0	0	0	0	0	0	0.0667077	0	0	0.0506021	0.156601	0
CT87	Enterobacter cancerogenus	0	0	0	0	0	0	0	0	0	0	0	0	0	0	0	0	0
CT88	Lactobacillus johnsonii	0	0	0	0	0	0	0	0	0	0	0	0	0	0	0	0	0
CT90	Lachnospiraceae [G-7] sp.	0	0	0	0	0	0	0	0	0	0	0	0	0	0	0	0	0
CT91	Treponema sp.	0	0	0	0	0	0	0	0	0	0	0	0	0	0	0	0	0
CT92	Gemella bergeri	0	0	0	0	0	0	0	0	0	0	0	0	0	0	0	0	0
CT93	Peptostreptococcaceae [XI][G-4] sp.	0	0	0	0	0	0	0	0	0	0	0	0	0	0	0	0	0
CT94	Peptostreptococcaceae [XI][G-1] infirmum	0	0	0	0	0	0	0	0	0	0	0.0624238	0	0	0	0	0	0
CT95	Corynebacterium tuscaniense	0	0	0	0	0	0	0	0	0	0	0	0	0	0	0	0	0
CT96	Microbacterium flavescens	0	0.402466	0	0	0	0	0	0	0	0	0	0	0	3.41805	0	0	0.0825477
CT97	Stomatobaculum longum	0	0	0.811847	0	0	0	0	0	0	0.0792852	0	0	0	0	0	0	0
CT98	Propionibacterium propionicum	0	0	0	0.0913026	0	0	0.985798	0	0.0671371	0	0.0971037	0.300185	0	0	0.0531322	0.201344	0
CT99	TM7 [G-1] sp.	0	0	0	0	0	0	0	0	0	0	0	0	0	0	0	0	0
CT100	Pedobacter sp.	0	0	0	0	0	0	0	0	0	0	0	0	0	0	0	0	0
CT101	Leptotrichia hofstadii	0	0	4.75144	0.511294	2.82912	0.0643725	0	0.0775446	0.0537097	0	0	0	0	0.298099	0.0667948	0	0
CT102	Bifidobacterium subtile	0	0	0	0	0	0	0	0	0	0	0	0	0	0	0	0	0
CT103	Ralstonia pickettii	0	0	0	0	0	0	0	0	0	0	0	0	0	0	0	0	0
CT104	Lactobacillus plantarum	0	0	0	0	0	0	0	0	0	0	0	0	0	0	0	0	0
CT105	Neisseria sp.	0	0	0	0	0	0	0	0	0	0	0	0	0	0	0	0.050336	0
CT106	Mycoplasma buccale	0	0	0	0.547815	0	0	0	0	0	0	11.6524	0	0	0	0	0	0.330191
HMT1	Bartonella schoenbuchensis	0	0	0	0	0	0	0	0	0	0	0	0	0	0	0	0	0
HMT2	Caulobacter sp.	0	0	0	0	0	0	0	0	0	0	0	0	0	0.061637	0	0	0
HMT3	Sphingomonas echinoides	0	0	0	0	0	0	0	0	0	0	0	0	0	0.100861	0	0	0
HMT4	Sphingomonas sp.	0	0	0	0	0	0	0	0	0	0	0	0	0	0.184911	0	0	0
HMT5	Sphingomonas sp.	0	0	0	0	0	0	0	0	0	0	0	0	0	0	0	0	0
HMT6	Sphingomonas sp.	0	0	0	0	0	0	0	0	0	0	0	0	0	0	0	0	0
HMT13	Neisseria bacilliformis	0	0	0	0	0	0	0.0915384	5.14339	0	0	0	0	0.181499	0	0	0	0
HMT14	Neisseria oralis	0	0	0	0.547815	0.239756	0	0.288698	0.502828	7.21053	0	0.319055	0.225139	0	0.106464	0.223914	3.20473	0.144458
HMT20	Neisseria sp.	0	0	0	0	0	0	0	0	0	0	0	0	0	0	0	0	0
HMT22	Lautropia mirabilis	0	0	0.413045	0.0608684	0	0	0.408402	0	0	1.71454	0.0601118	0.283508	0	0.394103	0	0.581661	0
HMT23	Delftia acidovorans	0	0	0	0	0	0	0	0	0	0	0	0	0	0.121033	0	0	0
HMT24	Schlegelella thermodepolymerans	0	0	0	0	0	0	0	0	0	0	0	0	0	0	0	0	0
HMT25	Leptothrix sp.	0	0	0	0	0	0	0	0	0	0	0	0	0	0	0	0	0
HMT26	Schlegelella aquatica	0	0	0	0	0	0	0	0	0	0	0	0	0	0	0	0	0
HMT27	Cupriavidus gilardii	0	0	0	0	0	0	0	0	0	0	0	0	0	0.0504303	0	0	0
HMT28	Rhodocyclus sp.	0	0	0	0	0.359634	0	0	0.0969307	0	0	0	0	0	0.0560337	0	0	0
HMT32	Pseudomonas sp.	0	0	0	0	0	0	0	0	0	0	0	0	0	0	0	0	0
HMT37	Stenotrophomonas nitritireducens	0	0.268311	0	0	0.119878	0	0.0563313	0	0	0	0.277439	0.200123	0	5.48289	0	0	0.0619107
HMT38	Olsenella uli	0	0	0	0	0	0	0	0	0	0	0	0	0	0	0	0	0
HMT39	Bdellovibrio sp.	0	0	0	0	0	0	0	0	0	0	0	0	0	0	0	0	0
HMT41	Desulfobulbus sp.	0	0	0	0	0	1.04605	0	0	0	0	0	0	0	0	0.144216	0	0
HMT44	Campylobacter sp.	0	0	0	0	0	0	0	0	0	0	0	0	0	0	0	0	0
HMT45	Bacillus clausii	0	0	0	0	0	0	0	0	0	0	0	0	0	0	0	0	0
HMT48	Paenibacillus sp.	0	0	0	0	0	0	0	0	0	0	0	0	0	0	0	0	0
HMT75	Ruminococcaceae [G-1] sp.	0	0	0	0	0	0	0	0	0	0	0.0538315	0	0	0	0	0	0
HMT78	Oribacterium sp.	0	0	0	0.182605	0	0	0	0	0	0	0	0	0	0.0672404	0.106264	0	0
HMT80	Butyrivibrio sp.	0	0	0	0	0	0	0	0	0	0	0.110976	0	0	0	0	0	0
HMT81	Peptostreptococcaceae [XI][G-7] sp.	0	0	0	0	0	0	0	0	0	0	0	0	0	0	0	0	0
HMT83	Lachnoanaerobaculum sp.	0	0	0	0	0	0	0	0	0	0	0	0	0	0	0	0	0
HMT85	Ruminococcaceae [G-2] sp.	0	0	0	0	0	0	0	0	0	0	0	0	0	0	0	0	0
HMT88	Lachnospiraceae [G-2] sp.	0	0	0	0	0	0	0	0	0	0	0.47627	0	0	0	0	0	0
HMT89	Lachnoanaerobaculum sp.	0	0	0	0	0	0	0	0.121163	0	4.59854	0	0	0	0	0.166987	0	0
HMT90	Butyrivibrio sp.	0	0	0	0	0	0	0	0	0	0	0	0	0	0	0	0	0
HMT91	Peptostreptococcaceae [XI][G-2] sp.	0	0	0	0	0	0	0	0	0	0	0	0	0	0	0	0	0
HMT93	Clostridiales [F-1][G-1] sp.	0	0	0	0	0	0	0	0	0	0	0	0	0	0	0	0	0
HMT94	Lachnospiraceae [G-10] sp.	0	0	0	0	0	0	0	0	0	0	0	0	0	0	0	0	0
HMT95	Shuttleworthia satelles	0	0	0	0	0	0	0	0	0	0	0	0	0	0	0	0	0
HMT96	Lachnospiraceae [G-2] sp.	0	0	0	0	0	0	0	0	0	0	0	0	0	0.0522981	0	0	0
HMT97	Stomatobaculum sp.	0.0714441	0	0	0	0	0	0	0	0	0	0	0	0	0	0	0	0
HMT100	Lachnospiraceae [G-3] sp.	0	0	0	0	0	0	0	0	0	0	0	0	0	0	0	0	0
HMT102	Oribacterium sp.	0	0	0	0	0	0	0	0	0	0	0	0	0	0	0	0	0
HMT107	Lachnoanaerobaculum umeaense	0	0	0	0	0	0	0	0	0	0	0	0	0	0	0	0	0
HMT108	Oribacterium asaccharolyticum	0	0	0	0	0	0	0	0	0	0	0	0	0	0	0	0	0
HMT113	Peptoniphilaceae [G-1] sp.	0	0	0	0	0	0	0	0	0	0	0	0	0	0	0	0	0
HMT118	Dialister invisus	0	0	0	0	0.0685018	0	0	0.370414	0	0	0	0	0	0	0	0	0
HMT119	Dialister sp.	0	0	0	0	0	0	0	0	0	0	0	0	0	0	0	0	0
HMT121	Anaeroglobus geminatus	0	0	0	0	0	0	0	0	0	0	0	0	0	0	0	0	0
HMT122	Megasphaera micronuciformis	0	0	0	0	0	0	0	0	0	0	0	0	0	0	0	0	0
HMT123	Megasphaera sp.	0	0	0	0	0	0	0	0	0	0	0	0	0	0	0	0	0
HMT131	Mitsuokella sp.	0	0	0	0	0	0	0	0	0	0	0	0	0	0	0	0	0
HMT166	Johnsonella sp.	0	0	0	0.486947	0	0	0	0	0	0	0	0	0	0	0	0	0
HMT179	Actinomyces timonensis	0	0	0	0	0	0	0	0	0	0	0	0	0	0	0	0	0
HMT183	Actinobaculum sp.	0	0	0	0	0	0	0	0	0	0	0	0	0	0	0	0	0
HMT189	Kocuria sp.	0.309591	1.16268	0	0	0	0	0	0	0	0	0	0.0667077	0	6.92203	0	0	0
HMT190	Arsenicicoccus bolidensis	0	0	0	0	0	0	0	0	0	0	0	0	0	0	0	0	0
HMT191	Propionibacterium acidifaciens	0	0	0	0	0	0	0	0	0	0	0	0	0	0	0	0	0
HMT192	Propionibacterium sp.	0	0	0	0	0	0	0	0	0	0	0	0	0	0	0	0	0
HMT195	Scardovia wiggsiae	0	0	0	0	0	0	0	0	0	0	0	0	0	0	0	0	0
HMT198	Alloscardovia omnicolens	0	0	0	0	0	0	0	0	0	0	0	0	0	0	0	0	0
HMT199	Atopobium sp.	0	0	0	0	0	0	0	0	0	0	0	0	0	0	0	0	0
HMT214	Leptotrichia shahii	0	0	0.581112	0	0	0	0	0	0	0	0	0	0	0.454993	0	0	0
HMT215	Leptotrichia sp.	0	0	0	0	0	0	0	0	0	0	0	0	0	0	0	0	0
HMT218	Leptotrichia sp.	0	0	0	0	0	0	0	0	0	0	0	0	0	0	0	0	0
HMT219	Leptotrichia sp.	0	0	0	0	0.0959025	0	0	0	0	0.24182	0	0	0.0725997	0	0	1.27518	0
HMT221	Leptotrichia sp.	0	0	0	0	0	0	0	0	0.0590807	0	0	0	0.0725997	0.197239	0	0	0
HMT223	Leptotrichia sp.	0	0	0	0	0.335659	0	0	0.0823911	0	0	0	0	0	0	0	0	0
HMT225	Leptotrichia sp.	0	0	0.136732	0	0.143854	0	0	0.407109	0	0.210106	0	0	0	0	0	0.0671147	0
HMT227	Treponema sp.	0	0	0	0	0	0	0	0	0	0	0	0	0	0	0	0	0
HMT232	Treponema sp.	0	0	0	0	0	0	0	0	0	0	0	0	0	0	0	0	0
HMT234	Treponema sp.	0	0	0	0	0	0	0	0	0	0	0	0	0	0	0.136626	0	0
HMT238	Treponema sp.	0	0	0	0	0	0	0	0	0	0	0	0	0	0	0	0	0
HMT239	Treponema sp.	0	0	0	0	0	0	0	0	0	0	0	0	0	0	0	0	0
HMT249	Treponema sp.	0	0	0	0	0	0	0	0	0	0	0	0	0	0	0	0	0
HMT252	Treponema sp.	0	0	0	0	0	0	0	0	0	0	0	0	0	0	0	0	0
HMT253	Treponema sp.	0	0	0	0	0	0	0	0	0	0	0	0	0	0	0	0	0
HMT254	Treponema sp.	0	0	0	0	0	0	0	0	0	0	0	0	0	0	0.273251	0	0
HMT256	Treponema sp.	0	0	0	0	0	0	0	0	0	0	0	0	0	0	0	0	0
HMT257	Treponema sp.	0	0	0	0	0	0	0	0	0	0	0	0	0	0	0	0	0
HMT258	Treponema sp.	0	0	0	0	0	0.643725	0	0	0	0	0	0	0	0	0	0	0.0619107
HMT262	Treponema sp.	0	0	0	0	0	0	0	0	0	0	0	0	0	0	0.0569274	0	0
HMT265	Treponema sp.	0	0	0	0	0	0	0	0	0	0	0	0	0	0	0	0	0
HMT270	Treponema sp.	0	0	0	0.0913026	0	3.17839	0	0	0	0	0	0	0	0	0	0	0
HMT271	Treponema sp.	0	0	0	0	0	0	0	0	0	0	0	0	0	0	0	0	0
HMT272	Bacteroidaceae [G-1] sp.	0	0	0	0	0	0	0	0	0	0	0	0	0	0	0	0	0
HMT274	Bacteroidales [G-2] sp.	0	0	0	1.82605	0.319675	0.107288	0.051637	3.91762	0	0.488926	0.0832317	0	0	0	9.83199	0	0
HMT280	Bacteroidetes [G-3] sp.	0	0	0	0	0	0	0	0	0	0	0	0	0	0	0	0	0
HMT281	Bacteroidetes [G-3] sp.	0	0	0	0	0	0	0	0	0	0	0	0	0	0	0	0	0
HMT288	Prevotella oulorum	0	0.0670777	1.73586	0	0.059939	0	0.271094	0	0.671371	0	0.0624238	0	0	0	0	0	0
HMT289	Prevotella maculosa	0	0	0.721049	0	0.479512	0	0	0.127222	0	0	0.0693598	0	0	0	0.280842	0	0
HMT291	Prevotella denticola	0	0	0	0	0	0	0.0809763	0	0	0	0.249695	0	0	0	0	0	0
HMT299	Prevotella nanceiensis	0.198456	0	0	0	0	0	0	0	0	0	0.0554878	0	0	0	0	0.0671147	0
HMT301	Prevotella sp.	0	0	0	0.0608684	0.0799187	0	0	0	0	0	0	0	0	0	0	0	0
HMT302	Alloprevotella rava	0	0	0	0	0	0	0	0.0848144	0	0	0	0	0	0	0	0	0
HMT303	Prevotella pleuritidis	0	0	0	0	0.179817	0	0	0.169629	0	0	0	0	0	0	0	0	0
HMT304	Prevotella sp.	0	0	0	0	0	0	0	0	0	0	0	0	0	0	0	0	0.185732
HMT305	Prevotella sp.	0	0	0	0	0	0	0	0	0	0	0	0	0	0	0	0	0
HMT307	Prevotella salivae	0	0	1.12697	0	0	0	0.0809763	0	0	0	0	0	0	0	0	0	0.0619107
HMT309	Prevotella sp.	0	0	0	0	0	0	0	0	0	0	0	0	0	0	0	0	0
HMT311	Prevotella oris	0	0	0.608885	0.867374	2.03793	0	0.264053	0.381665	1.51059	0.559952	0.0901677	0	0	0.148489	0	1.00672	1.05248
HMT315	Prevotella sp.	0	0	0	0	0	0	0	0	0	0	0	0	0	0	0	0	0
HMT317	Prevotella sp.	0	0	1.75615	0	0.671317	0.354049	0.163361	0.441035	6.17662	0.836459	0.155366	0	0	0	0.440238	0	0.0825477
HMT318	Pedobacter sp.	0	0	0	0	0	0	0	0	0	0	0	0	0	0	0	0	0
HMT319	Bergeyella sp.	0	0	0	0	0	0	0	0	0	0	0	0	0	0	0	0	0
HMT320	Flavitalea sp.	0	0.0894369	0	0	0	0	0	0	0	0	0	0	0	0	0	0	0
HMT322	Bergeyella sp.	8.62093	0.0894369	0.0569717	0	0	0	0.807415	0.218094	0.429678	2.09445	0	8.50524	4.71898	0	0.0759031	3.0649	0.687897
HMT326	Capnocytophaga sp.	0	0.0670777	2.52634	0.136954	0	0	0.0915384	0	0.0671371	0	1.76867	0.250154	0	0	0	0	0
HMT329	Capnocytophaga leadbetteri	0	0	3.54649	0	4.97494	0	0.144349	0.829969	0	5.05443	0.0971037	0	0	0.145688	0.463009	12.3155	0.165095
HMT332	Capnocytophaga sp.	0	0	0	0.273908	0.059939	0	0	0	0	0	0	0	0	0	0	0	0
HMT337	Capnocytophaga gingivalis	0.0833515	0.0670777	1.43676	0	0.839146	0	1.02453	4.77384	0	0.817629	0.0693598	0	2.26874	0.0700421	0.231505	0.318795	0.0619107
HMT338	Capnocytophaga sp.	0	0	0.121065	0.0608684	0	0	0.525759	0	0	0	0.194207	0	0	0	0	0	0
HMT345	SR1 [G-1] sp.	0	0	0	0	0	0	0	0.0969307	0	0	0.110976	0	0	0	0	0	0
HMT347	TM7 [G-1] sp.	0	0	0	0	0	0	0	0	0	0	0	0	0	0	0	0	0
HMT348	TM7 [G-1] sp.	0	0	0	0	0	0	0	0	0	0	0	0	0	0	0	0	0
HMT349	TM7 [G-1] sp.	0	0	0	0	0	0	0	0	0	0	0	0	0	0	0	0	0
HMT350	TM7 [G-2] sp.	0	0	0	0	0	0	0	0	0	0	0	0	0	0	0	0	0
HMT351	TM7 [G-3] sp.	0	0	0	0	0	0	0	0	0	0	0	0	0	0	0	0	0
HMT355	TM7 [G-4] sp.	0	0	0	0	0	0	0	0	0	0	0	0	0	0	0	0	0
HMT356	TM7 [G-5] sp.	0	0	0	0	0	0	0	0	0	0	0	0	0	0	0	0	0
HMT357	Pyramidobacter piscolens	0	0	0	0	0	0.0804657	0	0	0	0	0	0	0	0	0	0	0
HMT363	Fretibacterium fastidiosum	0	0	0	0.73042	0.0799187	4.7743	0	0.460421	0	0	0.120224	0	0	0	0.323853	0	0
HMT365	Bacteroidetes [G-3] sp.	0	0	0	0	0	0	0	0.387723	0	0	0.171087	0	0	0	0	0	0
HMT366	Ruminococcaceae [G-3] sp.	0	0	0	0	0	0	0	0	0	0	0	0	0	0	0	0	0
HMT368	Dietzia cinnamea	0	0	0	0	0	0	0	0	0	0	0	0	0	0	0	0	0
HMT373	Stomatobaculum sp.	0	0	0	0	0	0	0	0	0	0	0	0	0	0	0	0	0
HMT375	Peptoniphilus sp.	0	0	0	0	0	0	0	0	0	0	0	0	0	0	0	0	0
HMT376	Prevotella sp.	0	0	0	0	0	0	0	0	0	0	0	0	0	0	0	0	0
HMT378	Prevotella micans	0	0	0	0	0.479512	0	0	0.36349	0	0	0	0	0	0	0	0	0
HMT381	Ruminococcaceae [G-3] sp.	0	0	0	0	0	0	0	0	0	0	0	0	0	0	0	0	0
HMT382	Peptostreptococcaceae [XI][G-8] sp.	0	0	0	0	0	0	0	0	0	0	0	0	0	0	0	0	0
HMT383	Peptostreptococcaceae [XI][G-1] sp.	0	0	0	0	0	0	0	0	0	0	0	0	0	0	0	0	0
HMT386	Peptoniphilus sp.	0	0	0	0	0	0	0	0	0	0	0	0	0	0	0	0	0
HMT388	S elenomonas sp.	0	0	0	0	0	0	0	0	0	0	0	0	0	0	0	0	0
HMT389	Abiotrophia defectiva	0	0	0	0	0	0	0	0.0807756	0	0	0	0	0	0	0	0	0.0550318
HMT392	Leptotrichia sp.	0	0	0.0897305	0.109563	4.26766	0	0	0.591277	0	0	0	0	0	0	0	0	0
HMT396	Prevotella sp.	0	0	0	0	0	0	0	0	0	0	0	0	0	0	0	0	0
HMT402	Clostridiales [F-1][G-2] sp.	0	0	0	0	0	0	0	0	0	0	0	0	0	0	0	0	0
HMT414	Actinomyces sp.	0	0	0	0	0	0	0	0	0	0	0	0	0	0	0	0	0
HMT416	Atopobium sp.	0	0	0	0	0	0	0	0	0	0	0	0	0	0	0	0	0
HMT422	Bergeyella sp.	0	0	0	0	0	0	0	0	0	0	0	0	0	0	0	0	0
HMT435	Syntrophomonadaceae [VIII][G-1] sp.	0	0	0	0	0	0	0	0	0	0	0	0	0	0	0	0	0
HMT436	Bacteroidetes [G-3] sp.	0	0	0	0	0	0	0	0	0	0	0	0	0	0	0	0	0
HMT439	Anaerolineae [G-1] sp.	0	0	0	0	0	0.241397	0	0	0	0	0	0	0	0	0	0	0
HMT443	Prevotella sp.	0	0	0	0	0	0	0	0	0	0	0	0	0	0	0	0	0
HMT448	Actinomyces sp.	0	0	0	0	0	0	0	0	0	0	0	0	0	0	0	0	0
HMT451	Catonella sp.	0	0	0	0	0	0	0	0	0	0	0	0	0	0	0	0	0
HMT455	Butyrivibrio sp.	0	0	0	0	0	0	0	0	0	0	0	0	0	0	0	0	0
HMT459	Kingella sp.	0	0	0	0	0	0	0.0657199	0	0	0	0	0	0	0	0	0	0
HMT465	Bacteroides zoogleoformans	0	0	0	0	0	0	0	0	0	0	0	0	0	0	0	0	0
HMT466	Alloprevotella tannerae	0	0.0536621	0	0	0	0	0	5.1034	0	0	0.288537	0	0	0	0.0698309	0	0
HMT468	Bacillus subtilis	0	0	0	0	0	0	0	0	0	0	0	0	0	0	0	0	0
HMT473	Alloprevotella sp.	0	0	0	0	0	0	0	0.109047	0	0.284105	0.0924797	0	0	0	0	0	0.165095
HMT475	Prevotella sp.	0	0	0	0	0	0	0	0	0	0	0	0	0	0	0	0	0
HMT477	Pseudomonas stutzeri	0	0	0	0	0	0	0	0	0	0	0	0	0	0	0	0	0
HMT484	Erysipelothrix tonsillarum	0	0	0	0	0	0	0	0	0	0	0	0	0	0	0	0	0
HMT485	Agrobacterium tumefaciens	0	0	0	0	0	0	0	0	0	0	0	0	0	0.051551	0	0	0
HMT488	TM7 [G-1] sp.	0	0	0	0	0	0	0	0	0	0	0	0	0	0	0	0	0
HMT490	Treponema sp.	0	0	0	0	0	0	0	0	0	0	0	0	0	0	0	0	0
HMT493	Peptostreptococcaceae [XI][G-5] sp.	0	0	0	0	0	0	0	0	0	0	0	0	0	0	0	0	0
HMT494	Lachnoanaerobaculum saburreum	0	0	0	0	0	0	0	0	0	0	0	0	0	0	0	0	0
HMT495	Peptostreptococcaceae [XI][G-3] sp.	0	0	0	0	0	0.0536438	0	0	0	0	0	0	0	0	0	0	0
HMT496	Lachnoanaerobaculum sp.	0	0	0	0	0	0	0	0	0	0	0	0	0	0	0	0	0
HMT498	Leptotrichia sp.	0	0	0	0	0	0	0	0	0	0	0	0	0	0	0	0	0
HMT500	Lachnospiraceae [G-8] sp.	0	0	0	0.36521	0	0.482794	0	0	0	0	0	0	0	0.134481	1.30553	0	0
HMT501	Selenomonas sp.	0	0	0	0	0	0	0	0	0	0	0	0	0	0	0	0	0
HMT503	Bacteroidetes [G-3] sp.	0	0	0	0	0	0	0	0	0	0	0	0	0	0	0	0	0
HMT504	Mollicutes [G-1] sp.	0	0	0	0	0	0	0	0	0	0	0	0	0	0	0	0	0
HMT505	Bacteroidetes [G-5] sp.	0	0	0	0	0	0	0	0	0	0	0	0	0	0	0	0	0.247643
HMT507	Bacteroidetes [G-5] sp.	0	0	0	0	0	0	0	0	0	0	0	0	0	0	0	0	0
HMT508	Treponema sp.	0	0	0	0	0	0	0	0	0	0	0	0	0	0	0.402287	0	0
HMT509	Bacteroidetes [G-4] sp.	0	0	0	0	0	0	0	0	0	0	0	0	0	0	0	0	0
HMT511	Bacteroidetes [G-5] sp.	0	0	0	0	0.137004	0	0	0.225018	0	0	0	0	0	0	0	0	0
HMT515	Prevotella sp.	0	0	0	0	0	0	0	0.203554	0	0	0	0	0	0	0	0	0
HMT516	Bacteroidetes [G-6] sp.	0	0	0	0	0	0.120699	0	0	0	0	0	0	0	0	0	0	0
HMT518	Treponema sp.	0	0	0	0	0	0	0	0	0	0	0	0	0	0	0	0	0
HMT521	Mitsuokella sp.	0	0	0	0	0	0	0	0	0	0	0	0	0	0	0	0	0
HMT523	Neisseria sp.	0	0	0	0	0	0	0	0	0	0	0	0	0	0	0	0	0
HMT525	Actinomyces sp.	0	0	0	0	0	0.110987	0	0	0	0	0	0	0	0	0	0	0
HMT526	Prevotella sp.	0	0	0	0	0	0.0643725	0	0.339257	0	0	0.127622	0	0	0	0	0	0
HMT531	Aggregatibacter actinomycetemcomitans	0	0	0	0	0	0	0	0	0	0	0	0	0	0	0	0	0
HMT537	Streptococcus agalactiae	0	0	0	0	0	0	0	0	0	0	0	0	0	0	0	0	0
HMT538	Pseudoramibacter alactolyticus	0	0	0	0	0	0.160931	0	0	0	0	0	0	0	0	0	0	0
HMT539	Filifactor alocis	0	0.0670777	0	0.136954	0	0.724191	0	0.0605817	0	0	0.513262	0	0	0	1.06264	0	0.123821
HMT540	Cardiobacterium valvarum	0	0	0	0.0608684	0.159837	0	0	0	0	0	0	0	0.120999	0	0	0.648775	0
HMT541	Treponema amylovorum	0	0	0	0	0	0	0	0	0	0	0.291311	0	0	0	0	0	0
HMT544	Ochrobactrum anthropi	0	0	0	0	0	0	0	0	0	0	0	0	0	0	0	0	0
HMT552	Propionibacterium avidum	0	0	0	0	0	0	0	0	0	0	0	0	0	0	0	0	0
HMT553	Prevotella baroniae	0	0	0	0.228256	0	0	0	0	0	0	0	0	0	0	0	0	0
HMT556	Prevotella bivia	0	0	0	0	0	0	0	0	0	0	0	0	0	0	0	0	0
HMT557	Peptostreptococcaceae [XI][G-9] [Eubacterium] brachy	0	0	0	0	0	0	0	0	0	0	0	0	0	0	0	0	0
HMT559	Afipia broomeae	0	0	0	0	0	0	0	0	0	0	0	0	0	0.224135	0	0	0
HMT560	Prevotella buccae	0	0	0	0	0	0	0	0.19992	0	0	0	0	0	0	0	0	0
HMT562	Prevotella buccalis	0	0	0	0	0	0	0	0	0	0	0	0	0	0	0	0	0
HMT563	Leptotrichia buccalis	0	0	0.0854576	0.255647	0.287707	0	0	0.101777	0	0	0	0	0	0	0	0	0
HMT569	Eggerthia catenaformis	0	0	0	0	0	0	0	0	0	0	0	0	0	0	0	0	0
HMT571	Burkholderia cepacia	0	0	0	0	0	0	0	0	0	0	0	0	0	0	0	0	0
HMT574	Escherichia coli	0	0	0	0	0	0	0	0	0	0	0	0	0	0	0	0	0
HMT577	Eikenella corrodens	0	0	0.0801165	0.273908	0.179817	0	0	0.0969307	0	0	0.0832317	0	0	0	0.0569274	0.117451	0
HMT579	Cryptobacterium curtum	0	0	0	0	0	0	0	0	0	0	0	0	0	0	0	0	0
HMT583	Prevotella dentalis	0	0	0	0.109563	0	0.25749	0	0	0	0	0	0	0	0	0	0	0
HMT590	Brevundimonas diminuta	0	0	0	0	0	0	0	0	0	0	0	0	0	0.168101	0	0	0
HMT591	Corynebacterium diphtheriae	0	0	0	0	0	0	0	0	0	0	0	0	0	0.235341	0	0	0
HMT595	Corynebacterium durum	0	0.715495	0	0.0608684	0	0	0	0	0.913065	0	0	0.333539	4.11398	0.112067	0	0.0894862	0
HMT596	Granulicatella elegans	0	0.0894369	0	0	0	0	0.143175	0.129241	0	0.300623	0	0.133415	0	0	0	0	0.0550318
HMT597	Bradyrhizobium elkanii	0	0	0	0	0	0	0	0	0	0	0	0.0500308	0	0	0	0	0
HMT598	Neisseria elongata	0.11312	0	0.0907987	0	0.299695	0	0	0.896609	0	0.282454	0	0	0	0.0840505	0	0.805376	0.0619107
HMT600	Prevotella enoeca	0	0	0	0	0	0	0	0	0	0	0	0	0	0	0	0	0
HMT602	Slackia exigua	0	0	0	0	0	0	0	0	0	0	0	0	0	0	0	0	0
HMT603	Bulleidia extructa	0	0	0	0	0	0	0	0	0	0	0	0	0	0	0	0	0
HMT607	Mycoplasma fermentans	0	0	0	0	0	0	0	0	0	0	0	0	0	0	0	0	0
HMT608	Lactobacillus fermentum	0	0	0	0	0	0	0	0	0	0	0	0	0	0	0	0	0
HMT612	Pseudomonas fluorescens	0	0	0	0	0	0	0	0	0	0	0	0	0	0	0	0	0
HMT613	Tannerella forsythia	0	0	0	0.73042	0	4.42561	0.0633727	1.75687	0	0.396426	2.82988	0	0	0.0784471	7.54477	0	0.330191
HMT614	Lysinibacillus fusiformis	0	0	0	0	0	0	0	0	0	0	0	0	0	0	0	0	0
HMT619	Porphyromonas gingivalis	0	0	0	0	0	13.3573	0.0774556	0	0	0.490577	10.4664	0	0	0	0	0	0.103185
HMT623	Campylobacter gracilis	0	0.0894369	0.82609	2.19126	0.719268	2.84312	0	0.201939	2.70339	0.118928	0.915549	0.767139	0.120999	0.16063	1.4118	0	0
HMT627	Capnocytophaga haemolytica	0	0	0	0	0	0	0	0	0.0872783	0	0	0	0	0	0	0	0
HMT630	Bacteroides heparinolyticus	0	0	0	0	0	0	0	0	0	0	0	0	0	0	0	0	0
HMT632	Mycoplasma hominis	0	0	0	0	0	0	0	0	0	0	0	0	0	0	0	0	0
HMT633	Cardiobacterium hominis	0	0	0.19228	0.121737	0.319675	0	0	0	0	0	0.110976	0.233477	0.120999	0.3885	0	0.514546	0
HMT635	Johnsonella ignava	0	0	0	0.121737	0	0	0	0	0	0	0	0	0	0	0	0	0
HMT636	Bosea vestrisii	0	0	0	0	0	0	0	0	0	0	0	0	0	0	0	0	0
HMT643	Prevotella intermedia	0	0	0	0.136954	9.71012	0	0.207722	0.690631	0	11.65	6.04817	0	0.635247	0	0	0	4.39566
HMT646	Kingella kingae	0	0	0	0	0	0	0	0	0	0	0	0	0	0	0	0	0
HMT652	Afipia sp. genosp. 4	0	0	0	0	0	0	0	0	0	0	0	0	0	0	0	0	0
HMT653	Treponema lecithinolyticum	0	0.0670777	0	3.14994	1.31866	0	0	0	0	0	0.998781	0	0	0	1.38903	0	0.123821
HMT654	Eggerthella lenta	0	0.357747	0.142429	0	0	0	0	0	0	0	0	0	0	0.0821827	0	0	0
HMT655	Eubacterium limosum	0	0	0	0	0	0	0	0	0	0	0	0	0	0.051551	0	0	0
HMT659	Mesorhizobium loti	0	0	0	0	0	0	0	0	0	0	0	0	0	0	0	0	0
HMT660	Defluvibacter lusatiensis	0	0	0	0	0	0	0	0	0	0	0	0	0	0	0	0	0
HMT662	Finegoldia magna	0	0	0	0	0	0	0	0	0	0	0	0	0	0	0	0	0
HMT663	Stenotrophomonas maltophilia	0	0	0	0	0	0	0	0	0	0	0	0	0	0.0644387	0	0	0
HMT665	Prevotella marshii	0	0	0	0	0.0799187	0	0	0	0	0	0	0	0	0	0	0	0
HMT666	Corynebacterium matrucHMTii	0	0	1.11807	0.304342	1.35862	0	0.145523	0.153474	0.22379	0	0	1.33415	0	0.183043	0.414937	0.0671147	0
HMT673	Peptostreptococcaceae [XI][G-6] [Eubacterium] minutum	0	0	0	0	0	0	0	0	0	0	0	0	0	0	0	0	0
HMT674	Atopobium minutum	0	0	0	0	0	0	0	0	0	0	0	0	0	0	0	0	0
HMT676	Proteus mirabilis	0	0	0	0	0	0	0	0	0	0	0	0	0	0	0	0	0
HMT678	Solobacterium moorei	0	0	0	0	0	0	0	0	0	0	0	0	0	0	0	0	0
HMT681	Rothia mucilaginosa	0	0	0	0	0	0	0	0	0	0	0	0	0	0.149423	0	0	0
HMT683	Simonsiella muelleri	0	0	0	0	0.059939	0	0	0	0	0	0.0693598	0	0	0	0	0	0
HMT684	Mitsuokella multacida	0	0	0	0	0	0	0	0	0	0	0	0	0	0	0	0	0
HMT685	Prevotella multiformis	0	0	0	0	0	0	0	0	0	0	0	0	0	0	0	0	0
HMT686	Streptococcus mutans	0	0.0536621	0	0	0	0	0	0	0	0	0	0	0	0	0	0	0
HMT693	Prevotella nigrescens	0	0	0	0.958677	0.059939	0	0	0.315025	0	0	0.797637	0	0	0	0.0607225	0.234901	0
HMT694	Peptostreptococcaceae [XI][G-6] [Eubacterium] nodatum	0	0	0	0	0	0	0	0	0	0	0	0	0	0	0	0	0
HMT700	Capnocytophaga ochracea	0	0	0	0	0	0	0	0	0	0	0	0	0	0	0	0.201344	0
HMT703	Desulfomicrobium orale	0	0	0	0	0	0	0	0	0	0	0	0	0	0	0	0	0
HMT704	Mycoplasma orale	0	0	0	0	0	0	0	0	0	0	0	0	0	0	0	0	0
HMT705	Prevotella oralis	0	0	0	0	0	0	0	0	0	0	0	0	0	0	0	0	0
HMT706	Kingella oralis	0.357221	0	0.384559	0	0.059939	0	4.01009	0	0.328972	0	0	1.85114	4.90048	0.131679	0.072108	0	0.103185
HMT711	Moraxella osloensis	0	0	0	0	0	0	0	0	0	0	0.0663441	0	0	0	0	0	0
HMT714	Prevotella pallens	0	0	0	0	0	0	0	0	0	0	0	0	0	0	0.0948789	0	0
HMT717	Variovorax paradoxus	0	0	0	0	0	0	0	0	0	0	0.13872	0	0	0.834902	0	0	0
HMT718	Haemophilus parainfluenzae	2.77838	8.80953	0.156672	0.243473	0	0	0.208895	0.565429	0.774315	4.37721	0.194207	2.75169	1.99649	0.485625	0.161927	0.346759	18.1742
HMT723	Atopobium parvulum	0	0	0.19228	0	0	0	0	0	0	0	0	0	0	0	0	0	0
HMT724	Treponema parvum	0	0	0	0	0	0.321863	0	0	0	0	0	0	0	0	0	0	0
HMT725	Treponema pectinovorum	0	0	0	0	0	0	0	0	0	0	0	0	0	0	0	0	0
HMT733	Chlamydophila pneumoniae	0	0	0	0	0	0	0	0	0	0	0	0	0	0	0	0	0
HMT736	Dialister pneumosintes	0	0	0	0	0	0	0	0	0	0	0.103049	0	0	0	0	0	0
HMT740	Pseudomonas pseudoalcaligenes	0	0	0	0	0	0	0	0	0	0	0	0	0	0.319392	0	0	0
HMT745	Streptococcus pyogenes	0	0	0	0	0	0	0	0	0	0	0	0	0	0	0	0	0
HMT746	Actinomyces radicidentis	0	0	0	0	0	0	0	0	0	0	0	0	0	0	0	0	0
HMT750	Atopobium rimae	0	0	0	0	0	0	0	0.436188	0	0	0	0	0	0	0	0	0
HMT753	Cronobacter sakazakii	0	0	0	0	0	0	0	0	0	0	0	0	0	0	0	0	0
HMT754	Mycoplasma salivarium	0	0	0	0	0	0	0	0	0	0	0	0	0	0	0.425058	0	0
HMT756	Lactobacillus salivarius	0	0	0	0	0	0	0	0	0	0	0	0	0	0	0	0	0
HMT759	Peptostreptococcaceae [XI][G-5] [Eubacterium] saphenum	0	0	0	0	0	0	0	0	0	0	0	0	0	0	0	0	0
HMT775	Capnocytophaga sputigena	0	0.134155	0.881282	0.273908	0.659329	0	0.542189	1.70235	0.0537097	1.17937	0.0624238	1.07566	0.816746	0	0.174577	15.9901	0.0619107
HMT776	Campylobacter sputorum	0	0	0	0	0	0	0	0	0	0	0	0	0	0	0	0	0
HMT777	Jonquetella anthropi	0	0	0	0	0	0	0	0	0	0	0	0	0	0	0	0	0
HMT780	Veillonella sp.	0	0	0	0.0913026	0	0	1.2921	0.115105	0	0.208124	0.0762957	0	0.0907496	0	0	0	0.330191
HMT781	Prevotella saccharolytica	0	0	0	0	0.719268	0	0	0	0	0	0	0	0	0	0	0	0
HMT782	Prevotella fusca	0	0	0	0	0	0	0	0	0	0	0.423095	0	0	0	0	0	0
HMT786	Paenibacillus phoenicis	0	0	0	0	0	0	0	0	0	0	0	0	0	0	0	0	0
HMT787	Bacteroides pyogenes	0	0	0	0	0	0	0	0	0	0	0	0	0	0	0	0	0
HMT790	Peptoniphilaceae [G-2] sp.	0	0	0	0	0	0	0	0	0	0	0	0	0	0	0	0	0
HMT794	Prevotella multisaccharivorax	0	0	0	0	0	0	0	0	0	0	0	0	0	0	0	0	0
HMT795	Prevotella shahii	0	0	0	0	0	0	0	0	0	0	0	0	0	0	0	0	0
HMT804	Lactococcus lactis	0	0	0	0	0	0	0	0	0	0	0	0	0	0	0	0	0
HMT805	Treponema pallidum	0	0	0	0	0	0	0	0	0	0	0	0	0	0	0	0	0
HMT806	Olsenella profusa	0	0	0	0	0	0	0	0	0	0	0	0	0	0	0	0	0
HMT807	Olsenella sp.	0	0	0	0	0	0	0	0	0	0	0	0	0	0	0	0	0
HMT809	Olsenella sp.	0	0	0	0	0	0	0	0	0	0	0	0	0	0	0	0	0
HMT810	Atopobium sp.	0	0	0	0	0	0	0	0	0	0	0	0	0	0	0	0	0
HMT811	Arcanobacterium haemolyticum	0	0	0	0	0	0	0	0	0	0	0	0	0	0	0	0	0
HMT812	Helicobacter pylori	0	0	0	0	0	0	0	0	0	0	0	0	0	0	0	0	0
HMT813	Dolosigranulum pigrum	0	0	0	0	0	0	0	0	0	0	0	0	0	0	0	0	0
HMT814	Atopobium vaginae	0	0	0	0	0	0	0	0	0	0	0	0	0	0	0	0	0
HMT816	Lactobacillus coleohominis	0	0	0	0	0	0	0	0	0	0	0	0	0	0	0	0	0
HMT820	Prevotella sp.	0	0	0	0	0	0	0	0	0	0	0	0	0	0	0	0	0
HMT821	Haemophilus ducreyi	0	0	0	0	0	0	0	0	0	0	0	0	0	0	0	0	0
HMT824	Bacillus anthracis	0	0	0	0	0	0	0	0	0	0	0	0	0	0	0	0	0
HMT825	Listeria monocytogenes	0	0	0	0	0	0	0	0	0	0	0	0	0	0.051285	0	0	0
HMT827	Yersinia pestis	0	0	0	0	0	0	0	0	0	0	0	0	0	0	0	0	0
HMT829	Gardnerella vaginalis	0	0	0	0	0	0	0	0	0	0	0	0	0	0	0	0	0
HMT830	Mobiluncus mulieris	0	0	0	0	0	0	0	0	0	0	0	0	0	0	0	0	0
HMT831	Alloiococcus otitis	0	0	0	0	0	0	0	0	0	0	0	0	0	0	0	0	0
HMT832	Turicella otitidis	0	0	0	0	0	0	0	0	0	0	0	0	0	0	0	0	0
HMT833	Moraxella catarrhalis	0	0	0	0	0	0	0	0	0	0	0	0	0	0	0	0	0
HMT836	Peptoniphilus lacrimalis	0	0	0	0	0	0	0	0	0	0	0	0	0	0	0	0	0
HMT837	Sneathia sanguinegens	0	0	0	0	0	0	0	0	0	0	0	0	0	0	0	0	0
HMT838	Lactobacillus iners	0	0	0	0	0	0	0	0	0	0	0	0	0	0	0	0	0
HMT839	Lactobacillus jensenii	0	0	0	0	0	0	0	0	0	0	0	0	0	0	0	0	0
HMT840	Peptoniphilus indolicus	0	0	0	0	0	0	0	0	0	0	0	0	0	0	0	0	0
HMT841	Megasphaera sp.	0	0	0	0	0	0	0	0	0	0	0	0	0	0	0	0	0
HMT842	Campylobacter ureolyticus	0	0	0	0	0	0	0	0	0	0	0	0	0	0	0	0	0
HMT843	Dialister micraerophilus	0	0	0	0	0	0	0	0	0	0	0	0	0	0	0	0	0
HMT844	Sneathia amnii [NVP]	0	0	0	0	0	0	0	0	0	0	5.40451	0	0	0	0	0	0
HMT845	Leptotrichia goodfellowii	0	0	0	0.438252	0	0	0.225325	0	0.155758	0	0.149817	0.060037	0.362998	0.212928	0.139662	0	0
HMT847	Leptotrichia sp.	0	0	0	0	0	0	0	0	0	0	0	0	0	0	0	0	0
HMT848	Actinobaculum sp.	0	0	0	0	0	0	0	0	0	0	0	0	0	0	0	0	0
HMT853	Corynebacterium urealyticum	0	0	0	0	0	0	0	0	0	0	0	0	0	0	0	0	0
HMT855	Kytococcus sedentarius	0	0	0	0	0	0	0	0	0	0	0	0	0	0	0	0	0
HMT856	Sanguibacter keddieii	0	0	0	0	0	0	0	0	0	0	0	0	0	0	0	0	0
HMT857	Rhodobacter capsulatus	0	0	0	0	0	0	0	0	0	0	0	0	0	0.165299	0	0	0
HMT858	Comamonas testosteroni	0	0	0	0	0	0.0536438	0	0	0	0	0	0	0	0	0	0	0
HMT859	Anaerococcus lactolyticus	0	0	0	0	0	0	0	0	0	0	0	0	0	0.0504303	0	0	0
HMT866	Actinomyces graevenitzii	0	0	0	0	0	0	0	0	0	0	0	0	0	0	0	0	0
HMT870	TM7 [G-6] sp.	0	0	0	0	0	0	0	0	0	0	0	0	0	0	0	0	0
HMT871	GN02 [G-1] sp.	0	0	0	0	0	0	0	0	0	0	0	0	0	0	0	0.0587253	0
HMT872	GN02 [G-1] sp.	0	0	0	0	0	0	0	0	0	0	0	0	0	0	0	0	0
HMT873	GN02 [G-2] sp.	0	0	0	0.0608684	0	0	0	0	0	0	0	0	0	0	0	0	0
HMT874	SR1 [G-1] sp.	0	0	0.0854576	0	0	0	0	0.072698	0	0	0.0554878	0	0	0	0	0.0671147	0
HMT875	SR1 [G-1] sp.	0	0	0	0	0	0	0	0	0	0	0	0	0	0	0	0	0
HMT876	Clostridiales [F-3][G-1] sp.	0	0	0	0	0	0	0	0	0	0	0	0	0	0	0	0	0
HMT878	Capnocytophaga sp.	0	0	0	0	0	0	0	0	0	0	0	0	0	0	0	0	0
HMT888	Actinomyces dentalis	0	0	0	0	0	0	0	0	0	0	0	0	0	0	0	0	0
HMT894	Ottowia sp.	0	0	0	0	0	0	0.0563313	0.581584	0	1.26856	0	0	0	0	0	3.2215	0
HMT896	Actinomyces sp.	0	0	0	0	0	0	0	0	0	0	0	0	0	0	0	0	0
HMT897	Actinomyces sp.	0	0	0	0	0	0	0	0	0	0	0	0	0	0	0	0	0
HMT899	Bacteroidetes [G-3] sp.	0	0	0	0	0	0	0	0	0	0	0	0	0	0	0	0	0
HMT901	Capnocytophaga sp.	0	0	0	0	0	0	0	0	0	0	0	0	0	0	0	0	0
HMT904	Erysipelotrichaceae [G-1] sp.	0	0	0	0	0	0	0	0	0	0	0	0	0	0	0	0	0
HMT905	Erysipelotrichaceae [G-1] sp.	0	0	0	0	0	0	0	0	0	0	0	0	0	0	0	0	0
HMT906	Mollicutes [G-2] sp.	0	0	0	0	0	0	0	0	0	0	0	0	0	0	0	0	0
HMT911	Bacteroidetes [G-7] sp.	0	0	0	0	0	0	0	0	0	0	0	0	0	0	0	0	0
HMT915	Propionibacterium sp.	0	0	0	0	0	0	0	0	0	0	0	0	0	0	0	0	0
HMT917	Veillonella sp.	0	0	0	0	0	0	0	0	0	0	0	0	0	0.0952572	0	0	0
HMT921	Paenibacillus glucanolyticus	0	0	0	0	0	0	0	0	0	0	0	0	0	0	0	0	0
HMT927	Treponema sp.	0	0	0	0	0	0	0	0	0	0	0	0	0	0	0	0	0
HMT929	Peptoniphilaceae [G-3] sp.	0	0	0	0	0	0	0	0	0	0	0	0	0	0	0	0	0
HMT930	Porphyromonas sp.	0	0	0	0	0	0	0	0.0605817	0	0	0	0	0	0	0	0	0
HMT931	Bergeyella sp.	0.150827	0	0	0	0	0	0	0	0	0	0	0	0	0	0	0	0
HMT932	Kingella sp.	0	0	0	0	0	0	0	0	0	0	0	0	0	0	0	0	0
HMT935	Fastidiosipila sanguinis	0	0	0	0	0	0	0	0	0	0	0	0	0	0	0	0	0
HMT939	Olsenella sp.	0	0	0	0	0	0	0	0	0	0	0	0	0	0	0	0	0
HMT942	Prevotella sp.	0	0	0	0	0	0	0	0	0	0	0	0	0	0	0	0	0
HMT943	Prevotella aurantiaca	0	0	0	0	0.059939	0	0	0	0	0	0	0	0	0	0	0	0
HMT949	Aggregatibacter sp.	0	0	0.0783361	0	0	0	0	0	0	0	0	0	0	0	0	0	0
HMT950	Peptostreptococcaceae [XI][G-3] sp.	0	0	0	0	0	0	0	0	0	0	0	0	0	0	0	0	0
HMT708	Actinomyces oricola	0	0	0	0	0	0	0	0	0	0	0	0	0	0	0	0	0

## Sheet: HY
		HY1	HY10	HY11	HY12	HY13	HY14	HY15	HY16	HY17	HY18	HY19	HY2	HY20	HY21	HY22	HY23	HY24	HY25	HY26	HY27	HY28	HY29	HY3	HY30	HY31	HY32	HY33	HY34	HY35	HY36	HY37	HY38	HY39	HY4	HY40	HY41	HY42	HY43	HY44	HY45	HY46	HY47	HY48	HY49	HY5	HY50	HY51	HY52
CT1	Selenomonas noxia; S. infelix	0.3044	0	0	0	0	0.0524006	0	0	0	0	0	0	0	0.0970987	0	0	0	0	0	0.160967	0.0803891	0	0	0.0523201	0.0805697	0	0	0	0	0	0	0	0	0	0	0	0	0	0.0595796	0	0	0	0	0	0	0	0	0.395757
CT2	Streptococcus mitis; S. oralis	2.93126	23.1531	26.1164	27.5071	9.79576	5.36451	1.21888	3.43978	0.459539	43.0529	5.76396	1.97283	46.5491	15.5965	9.65	6.87353	14.4167	23.4514	69.9469	9.81896	26.0963	5.54824	9.02879	1.46496	17.9066	55.8392	24.9565	27.8046	20.5896	11.1564	17.4838	2.9607	10.2954	6.82032	12.6417	17.0021	7.88945	2.32736	13.1373	10.5407	29.2525	10.9893	8.82831	40.7158	10.8196	12.052	13.5478	8.68212
CT3	Fusobacterium nucleatum	28.0499	4.03118	0.075975	3.57593	0.998784	4.40165	1.31134	5.19094	3.03296	0.755775	0.204373	10.6891	4.03476	8.70005	0.65467	0.192099	0.134805	3.14881	1.341	14.8411	2.53226	1.27685	0.222247	64.6049	1.18438	0.594825	0.786949	0.483953	6.6819	4.70753	25.548	19.8653	2.9936	0.177921	4.08636	2.98028	8.81413	48.3576	6.83974	0	0.325027	0.146874	12.7492	2.54402	1.24589	4.8421	31.1244	28.0044
CT4	Actinomyces naeslundii	0	0	0	0.458452	0.614636	0.440165	1.00873	0	0.551446	1.44165	1.53706	0	0.0597742	0.0679691	8.64674	0.40821	0.284589	0	0.0728803	0	0.0562724	0.182408	2.66697	0	0.338393	0.0594825	0.312281	0.157285	0.121612	0	0.537338	0.122248	0	1.95713	0.0788873	0.985956	0.186632	0.166928	0.58388	0.078809	0.18573	0.230802	0	0.786939	0	0	0	0.10638
CT5	Streptococcus parasanguinis	0.0676445	0.196005	0	0.114613	0	0.183402	0.462333	0.781768	0	0.158363	0.340622	0.717392	0.485665	1.61427	0.595154	0.240123	0.393182	0	0.0728803	2.65595	0.140681	0	1.11124	0	7.33185	0.594825	0.562107	0.234414	2.07754	1.02077	0.203537	0	1.58391	0	0.788873	0.630228	3.13881	0	1.19904	0.0985113	1.45102	1.54743	1.28657	0.796308	3.36063	0.889779	0.0778111	0.127434
CT6	Veillonella dispar; V. parvula	16.8886	23.5207	0.284906	4.46991	24.9696	3.80559	8.57417	27.44	37.1078	2.41367	4.35358	61.5163	0.924632	7.7679	6.82302	0.750385	9.97933	4.0258	0.528382	8.61171	0.914426	10.2604	6.38961	0.457801	27.2124	0.817884	1.51977	4.58243	3.19231	5.1999	0.427428	39.1576	12.1565	12.751	15.3041	16.7501	18.3981	0.577826	34.2769	39.4045	7.2841	2.07198	26.7657	2.65956	0.573767	18.0087	1.04613	4.08896
CT7	Treponema vincentii	1.48818	0	0	0	0	0	0.0840605	0	0	0	0	0	0	0	0	0	0	0	0	0	0.984766	0	0	0.0915602	0	0.0743531	0	0	0	0	0	0.0764051	0.118793	0	0	0	0	0	0	0	0	0	0.220352	0	0	0	0	0
CT8	Porphyromonas pasteri; P. catoniae	5.86252	0.0816689	1.70944	0.458452	3.84148	0.458505	0.336242	10.7102	1.14885	7.77072	0	0	2.87663	10.2682	0.743943	0.0600308	0.711472	2.09521	2.31395	7.24349	0.633064	0	0.277809	0.274681	9.02381	0.594825	7.03154	0.136112	6.33395	33.9975	0.651319	0.267418	6.35545	0	11.3992	2.75199	8.68476	12.343	0.469189	0	0	0.314731	0	3.41423	11.3114	1.65701	39.8652	20.0237
CT9	Actinomyces odontolyticus	0	0.0653352	0	0.458452	0.192074	0	0.756545	0.156354	0.689308	0	0	0	0	0.157785	0.52076	0	0	0	0.510162	0.0804833	0	0	0	0.549361	0.140997	0.148706	0.208188	0	1.01343	0	0.122122	0	1.14834	0	1.61719	0.182066	0.296915	0.722283	0.834114	0.656742	0.0580406	0.367186	0	0.0728647	0	0.0959044	0	0
CT10	Prevotella histicola	0.0676445	28.4616	0.0949688	0.114613	0.0960369	0.091701	0.210151	9.61574	0	0.507854	0.0798333	4.125	0.233493	8.95736	0	0.72037	1.32933	0.314282	0.218641	2.8974	1.54749	0	0.277809	0.274681	0	0.297413	1.12942	0.347841	2.65181	0.168126	0.16283	0.802253	4.33596	0	6.23209	0.448162	0.46658	0	1.98102	0.197023	5.5719	1.12778	10.3601	1.9101	0	1.22012	0	0.465411
CT11	Treponema socranskii	0.721541	0	0	0	0	0	0.420303	0	0.229769	0	0	0	0	0	0	0	0	0	0	0	0.140681	0	0	8.5151	0	0	0	0	0	0	1.30264	0.15281	0.118793	0	0	0	0	0	0.0521322	0	0	0	0	0	0	0	0	0
CT12	Fretibacterium sp.	0.541156	0	0	0	0	0	0.112081	0	0	0	0	0	0	0	0	0	0	0	0	0	0	0	0	0.12208	0	0	0	0	0	0	0	0	0	0	0	0	0	0	0	0	0	0	0	0	0	0	0	0
CT13	Aggregatibacter aphrophilus	0.721541	0.843912	0	1.60458	0.128049	1.10041	0	0.677532	0.229769	0.0509675	0	0	0.709818	0.0728241	0	0.180093	0.187229	9.17903	0.133614	0.0804833	0.468936	0	0.092603	0.18312	0	0	0.399026	20.8906	0.0506716	0.0800601	0.393505	0.140076	0.0791957	0	0.0657394	0.233418	0.692801	0.567126	0	0.459719	0	0.332216	0	0.208185	0.0546444	1.58065	2.37468	0.635322
CT14	Prevotella sp.	0	0	0	0	0	0	0	0	0	0	0	0	0	0.0970987	0	0	0	0	0	0	0	0	0	0	0	0	0	0	0	0	0	0.229215	0	0	0	0	0	0	0.156396	0	0	0	0.0568651	0	0	0	0	0
CT15	Parvimonas micra	0.101467	0	0	0	0	0	0	0	0	0	0	0	0	0	0	0	0	0	0	0	0	0	0	0	0	0	0	0	0	0	0	0	0	0	0	0	0	0	0	0	0	0	0	0	0	0	0.501449	0
CT16	Capnocytophaga sp.	0.191659	0	0.0949688	0.343839	0	0	0	0	0.229769	0	0	0	0.0933972	0	0	0	0	0.164624	0	0	0	0	0	0.0915602	0	0	0	0	0	3.11033	0	0.61124	0	0	0	0	0	0	0	0	0	0	0	0	0.0819666	0	0	1.03609
CT17	Selenomonas sp.	0	0	0	0	0	0	0	0	0	0	0	0	0	0	0	0	0	0	0	0	0	0	0	0	0	0	0	0	0	0	0	0	0	0	0	0	0	0	0.0595796	0	0	0	0	0	0	0	0	0
CT18	Lactobacillus vaginalis; L. panis	0	0	0	0	0	0	0	0	0	0	0	0	0	0	0	0	0	0	0	0	0	0	0	0	0	0	0	0	0	0	0	0	0	0	0	0	0	0	0	0	0	0	0	0	0	0	0	0
CT19	Lactobacillus brevis	0	0	0	0	0	0	0	0	0	0	0	0	0	0	0	0	0	0	0	0	0	0	0	0	0	0	0	0	0	0	0	0	0	0	0	0	0	0	0	0	0	0	0	0	0	0	0	0
CT20	Selenomonas artemidis	0.293126	0	0	0	0	0	0	0	0	0	0	0	0	0.0606867	0.0956498	0	0	0	0	0	0	0.152006	0	0	0.0704985	0	0	0	0	0	0	0	0	0	0	0	0.212082	0	0	0	0	0	0	0	0.4918	0	0	0
CT21	Selenomonas sputigena	0.0563704	0	0	0	0	0	0	0	0	0	0	0	0	0	0	0	0	0	0	0	0	0	0	0	0	0	0	0	0	0	0	0	0.0791957	0	0	0	0	0	0	0	0	0	0	0	0	0	0	0
CT22	Porphyromonas endodontalis	0.620074	0	0	0	0	0	0.0840605	0	0	0	0	0	0	0	0	0	0	0	0	0	14.6308	0	0	0	0	0	0	0	0	0	0	0	0.118793	0	0	0	0	0	0.0521322	0	0	0	0	0	0	0	0	0
CT23	Haemophilus haemolyticus	0.0826766	0.163338	0.126625	0.0764087	1.21647	0.733608	0	0.260589	0.15318	22.331	0.120637	0.0597827	1.45077	0.218472	0	0.280144	0	5.04847	0.218641	0.160967	17.6789	0	0.277809	0.0915602	0.516989	4.18856	13.1262	0.564611	0	2.28171	0.434212	2.73785	0.699562	0	3.16864	2.63295	0.0565552	0.0535024	0.33017	0	12.3433	0.0524551	0.0971446	1.62037	0	0.181153	0.726237	0.203155
CT24	Haemophilus sputorum	0.0676445	0.223228	3.73544	5.34861	0.0640246	0.30567	0	0.72965	0	0.258478	0	0	8.42442	1.08427	0	1.88097	0.0998557	0.977766	2.27144	0.348761	3.14187	0	0.185206	0.335721	0	1.01616	5.72516	0.615023	3.54701	0.560421	6.62174	0	0.237587	0.0988452	0.578507	2.02607	0	0	0.295416	0.503502	5.8621	0.297246	0.272479	0.121441	0.163933	0.223777	0.778111	0.64271
CT25	Neisseria flava; N. mucosa	0.428415	2.25406	8.26228	0.458452	0.384148	7.51948	1.47106	1.25083	37.7971	0.191128	48.5599	0	4.4457	0.388395	0	0.33017	12.9375	2.87343	6.94185	32.314	1.26613	40.5857	5.55618	2.51791	1.90346	5.53931	1.81123	1.51235	0	0.684514	5.35303	5.25285	9.97865	9.34087	2.4455	22.17	12.0675	0.128406	0.390991	4.13747	4.20794	2.46539	0.117284	6.20391	0.409833	31.9521	0.155622	0.465411
CT26	Kingella denitrificans	0.834282	0.10617	0	0.114613	0.384148	0.275103	0.630454	0.156354	0.114885	0.234814	0.212889	0	0.065378	0.0728241	0	0	0.0561688	2.52922	0.218641	0	0.140681	0	0	0.320461	0.0704985	0	0	1.72408	0	0.0720541	0.244245	0.210114	0.158391	0.518937	0.197218	0.58121	1.62243	0.0802537	0.13033	0.131348	0	0.262275	0	0	3.4426	3.93208	0	0.0720278
CT27	Neisseria subflava	0	0.163338	0.664781	3.89684	0	3.39294	0.0840605	5.7069	2.29769	1.48534	0.542867	0.627718	0.99001	4.69715	0.903359	0.0600308	0.280844	3.62173	0.145761	1.4487	0.703404	1.52006	1.38904	0.778262	0.140997	0.892238	5.45452	3.10032	9.12934	1.42907	0.427428	1.22248	15.8985	0.222402	20.5896	1.97471	1.06041	0	0.417057	0.952276	3.59852	9.33701	0	5.21503	0.901633	0.287713	0.224788	0.055406
CT28	Lachnoanaerobaculum orale	0	0	0	0	0	0	0	0	0	0	0	0	0	0	0.0566813	0	0	0	0	0	0	0	0	0	0	0	0	0	0	0	0	0	0	0	0	0	0	0	0	0	0	0	0	0	0	0	0	0
CT29	Capnocytophaga sp.	0.259304	0	0	0	0	0	0	0.0781768	0	0	1.12831	0	0	0	0.371971	0	0	0	0	0.4829	0	0	0	0	0.140997	0	0	0	0	0.288216	0.54955	0	0.0989946	0	0	0	1.2937	0	0	0	0	0	0	0	0.655733	0	0	0.991768
CT30	Veillonellaceae [G-1] sp.	0	0	0	0	0	0	0	0	0	0	0	0	0	0	0	0	0	0	0	0	0	0	0	0	0	0	0	0	0	0	0	0	0	0	0	0	0	0	0	0	0	0	0	0	0	0	0	0
CT31	Capnocytophaga sp.	0.0789185	0	0	0	0.192074	0	0	0	0.114885	0	0.260789	0	0	0.0970987	0	0	0	0	0	0	0	0	0	3.29617	0.140997	0	0	0	0	0	0	0	0	0	0	0	0.286311	2.26315	0.0521322	0	0	0	0	0	0	0	1.6081	0
CT32	Lactobacillus acidophilus; L. crispatus	0	0	0	0	0	0.091701	0	0	0	0	0	0	0	0	0.0637665	0	0	0	0	0	0	0	0	0	0	0	0	0	0	0	0	0	0	0	0	0	0.0742287	0	0	0	0	0.0786826	0	0	0	0	0	0
CT33	Class Bacilli	0	0.657163	13.9034	0	0	0	0.2774	0.23453	0	0	0	0.161413	0	0.0728241	0	40.0586	0	0	0	0	0	0	0.138904	0	0	0	0	0	0	0	0.0814148	1.66181	0	0.0593071	0.0591654	1.86267	0.167545	0	0	0.262697	4.38207	40.0967	0	0	0	0.111888	0	0
CT34	Leptotrichia wadei	0.0631348	0	0	0	1.07561	0	0	0	0	0	0	0	0	0	0	0	0	0	0	0.0643866	0	0	0	0	0.789583	0	0	0	0.0608059	0	0	0	0	0	0.331326	0	0.186632	0	0	0	0	0	0	0	0	0	0	0
CT35	Treponema sp.	0	0	0	0	0	0	0.168121	0	0	0	0	0	0	0	0	0	0	0	0	0	0	0	0	0	0	0	0	0	0	0	0	0	0	0	0	0	0	0	0	0	0	0	0	0	0	0	0	0
CT36	Veillonellaceae [G-1] sp.	0	0	0	0	0	0	0	0	0	0	0	0	0	0	0	0	0	0	0	0	0	0	0	0	0	0	0	0	0	0	0	0	0	0	0	0	0	0	0	0	0	0	0	0	0	0	0	0
CT37	Gemella morbillorum	0.24803	0.179672	7.02769	0.573065	0	14.6263	0	0.781768	0	2.8833	0	0.089674	5.77194	0.315571	0.138161	2.28117	0.187229	0.793188	1.54871	1.00604	10.4807	0.0760032	0	0	0.0704985	2.04471	10.1752	2.76004	0.363147	5.53615	12.2529	0.267418	1.18793	0	2.58356	1.40051	0.46658	0.144457	0.156396	0.0656742	2.72791	0.813054	0.0817436	1.73834	0.163933	0.0745923	1.48706	1.95583
CT38	Peptostreptococcaceae [XI][G-7] sp.	0	0	0	0	0	0	0	0	0	0	0	0	0	0	0	0	0	0	0	0	0	0	0	0.0915602	0	0	0	0	0	0	0	0	0	0	0	0	0	0.208659	0	0	0	0	0	0	0.163933	0	0.0691654	0
CT39	Staphylococcus aureus; S. epidermidis	0	0	0	0	0	0	0	0	0	0	0	0	0	0	0.0695635	0	0	0	0	0	0	0	0	0	0.0512716	0	0	0	0	0	0	0	0	0	0	0	0	0	0	0	0	0.0953729	0	0.140052	0	0	0	0
CT40	Veillonellaceae [G-1] sp.	0.0563704	0	0	0	0	0	0.0840605	0	0	0	0	0	0	0	0	0	0.131061	0	0	0	0	0	0	0	0	0	0	0	0	0	0	0	0	0	0	0	0	0	0.0781982	0	0.0580406	0.0524551	0	0	0	0	0	0
CT41	Klebsiella pneumoniae	0	0	0	0	0	0	0	0	0	0	0	0.0512423	0	0	0	0	0	0	0	0	0	0	0	0	0	0	0	0	0	0	0	0	0	0	0	0	0	0	0	0	0	0	0	0	0	0	0	0
CT42	Treponema maltophilum	0	0	0	0	0	0	0	0	0	0	0	0	0	0	0	0	0	0	0	0	0	0	0	0	0	0	0	0	0	0	0	0	0.0593967	0	0	0	0	0	0	0	0	0	0	0	0	0	0	0
CT43	Streptococcus gordonii; S. sanguinis	0.225482	3.51176	0.949688	1.14613	10.6601	1.05456	35.6837	0.0781768	6.31866	0.311266	11.1447	1.07609	0.438967	0.619004	21.6062	0.360185	24.9015	0.897948	0.455502	1.12677	1.40681	0.988042	61.5347	0	1.48047	1.04094	4.69984	0.461267	0.109788	0.456342	0.284952	0.133709	1.8413	36.3997	0.335271	2.56993	1.59062	0.240761	4.69189	11.5258	1.82828	1.33761	7.40668	2.09746	4.1803	5.76492	0.423638	0.7369
CT44	Peptococcus sp.	0	0	0	0	0	0	0	0	0	0	0	0	0	0	0	0	0	0	0	0	0	0	0	0	0	0	0	0	0	0	0	0	0	0	0	0	0	0	0	0	0	0	0	0	0	0	0	0
CT45	Actinomyces georgiae	0	0	0	0	0	0	0	0	0	0	0	0	0	0	0.170044	0	0	0	0	0.0536555	0	0	0	0	0.187996	0	0	0	0	0	0.0814148	0.229215	0	0	0	0	0	0.0642029	0	0	0	0	0	0	0	0	0.0576379	0
CT46	Mogibacterium timidum	0	0	0	0	0	0	0	0	0	0	0	0	0	0	0	0	0	0	0	0	0	0	0	0	0	0	0	0	0	0	0	0	0	0	0	0	0	0	0	0	0	0	0	0	0	0	0	0
CT47	Aggregatibacter segnis	0.255546	0	0	0	1.08842	0	0	0	0	0.331288	0	0	0	0	0	0	0	0	0	0.107311	0	0	0	0	0.187996	0	0	0	0	2.15362	0	0	0.0791957	0	0.18407	0	0.629177	0	0.0695095	0	0.0967343	0.0699401	0	0	0.0546444	0.0852483	0	0.91974
CT48	Rothia dentocariosa	0	0	0	8.40496	0	1.71175	0.560404	0.104236	0.15318	0.254837	5.42867	0	0.174341	0	23.2252	0.640329	5.64184	0.67845	1.99206	0.107311	0.0937873	0.506688	0.185206	0.0610401	0.187996	0.7931	1.47119	1.41153	24.2098	0.0960721	0.325659	0	0.395978	0.296536	0.0525915	0.961681	0	0.128406	0.104264	0.656742	1.62514	6.99401	6.0514	0.645373	0	0.390721	0.080693	0
CT49	Granulicatella adiacens	0.0751605	0.105625	0.392538	0.61127	0.256098	0.183402	0.173725	3.12707	0.382949	0.226441	0.0851555	0.179348	0.353664	0.456364	0.405272	0.144074	0.351991	0.708381	0.344967	0.348761	0.328255	1.16538	0.277809	0.12208	0.93998	0.297413	0.437194	0.755168	0.36934	0.0560421	0	0	0.527971	0.247113	1.0045	1.04758	0.496272	0	0.236332	1.05517	0.406284	0.961677	0.2213	1.36292	0	0.157709	0.0864568	0.0664872
CT50	Treponema denticola	0.631348	0	0	0	0	0	0.0840605	0	0	0	0	0	0	0	0	0	0	0	0	0	0.562724	0	0	0	0	0	0	0	0	0	0	0	0	0	0	0	0	0	0	0	0	0	0	0	0	0	0	0
CT51	Capnocytophaga granulosa	1.75876	0	0	0	2.94513	0	0	0.208471	0	0	0.0922518	0	0	0	0	0	0	3.59179	0	0	0.0937873	0.709364	0	0	0.093998	0	0	0	0	0	0.0542766	0	0.0527971	0	0.0525915	0.121377	0.0989716	0.235411	0	0	0	0	0	0	0.218578	0	0.0691654	1.44794
CT52	Lactobacillus rhamnosus	0	0	0	0	0	0	0	0.0625414	0	0	0	0	0	0	0	0	0	0	0	0	0	0	0	0	0	0	0	0	0	0	0	0	0	0	0	0	0	0	0	0	0	0	0	0	0	0	0	0
CT53	Tannerella sp.	0.563704	0	0.189938	0	0	0	0	0	0	0	0	0	0.0933972	0.36412	0	0.120062	0	0.0598632	0	1.28773	0	0	0	0	0	0	0	0	0.287139	0	0.732734	0.0764051	0.0791957	0	0.0788873	0	0	2.69652	0.156396	0	0	0	0.0710814	0	0	0	0	1.6511
CT54	Streptococcus anginosus	0.529882	0.138837	0	0.114613	2.40092	0.183402	0.126091	0	0	0	0	4.57337	0.196134	0.740378	0.478249	0	0.131061	0	0	0	0.0703404	0	0.138904	0.18312	0.49349	0	0.0572516	0.665435	0	0.0720541	0	0	0.316783	0	0	0.196071	0	2.76073	0.0781982	0	0.116081	0.0524551	4.02321	0.0780694	0	0.0905763	1.8934	0.637169
CT55	Porphyromonas asaccharolytica	0	0	0	0	0	0	0	0	0	0	0	0	0	0	0	0	0	0	0	0	0	0	0	0	0	0	0	0	0	0	0	0	0	0	0	0	0	0	0	0	0	0	0	0	0	0	0	0
CT56	Campylobacter rectus	0.405867	0.0653352	0	0	0.256098	0	0.0560404	0	0	0.0728107	0	0	0.261512	0	0	0	0	0.438997	0	0.107311	0	0	0	0	0.093998	0	0	0	0	0.144108	0	0.0764051	0	0	0	0	0	0	0	0	0	0	0.0521264	0.152669	11.4753	0.184705	0	2.84418
CT57	Alloprevotella sp.	0	0	0	0	0	0	0	0	0	0	0	0	0	0	0	0	0	0	0	0	0	0	0	0	0	0	0	0	0	0	0	0	0	0	0	0	0	0	0	0	0	0	0	0	0	0	0	0
CT58	Prevotella loescheii	4.73511	0	0	0	0	0	0	0	0	0	0	0.86087	0	0.0873889	0	0	0	0	0	0	0	0	0	0.0732482	0	0	0	0	0	0	10.7956	0	0	0	0	0	0	4.3016	0.14597	0	0	0	0	0	0.131147	0	0	0
CT59	Haemophilus influenzae	0	0	0	0	0	0	0	0	0	0	0	0	0	0	0	0	0	0	0	0	0	0	0	0	0	0	0	0	0	0	0	0	0	0	0	0	0	0	0	0	0	0	0	0	0	0	0	0
CT60	Campylobacter concisus	0.526124	0.0653352	0	0.764087	0.128049	0.061134	0	1.04236	0	0.0509675	0	0.478261	0.149435	0.0809156	0.311747	0.120062	0	0.319271	0.0728803	1.23408	0.0937873	0	0	0	3.75992	0.198275	0.0624563	0.100823	0	0.0640481	0	0.127342	1.45192	0	0.552211	0.0840304	0.749356	0	0.451812	0	0.386937	0.13988	0.208505	0.201245	0	0.206017	0	0.369373
CT61	Peptostreptococcus stomatis	0	0	0	0	0	0	0	0	0	0	0	0	0	0	0	0.26152	0	0	0	0	0	0	0	0	0	0	0	0	0	0	0	0	0	0	0	0	0	0	0	0	0	0	0	0	0	0	0	0
CT62	Bifidobacterium dentium	0	0	0	0	0	0	0	0	0	0	0	0	0	0	0	0	0	0	0	0	0	0	0	0	0	0	0	0	0	0	0	0	0	0	0	0	0	0	0	0	0	0	0	0	0	0	0	0
CT63	Mycobacterium tuberculosis	0	0	0	0	0	0	0	0	0	0	0	0	0	0	0	0	0	0	0	0	0	0	0	0	0	0	0	0	0	0	0	0	0	0	0	0	0	0	0	0	0	0	0	0	0	0	0	0
CT64	Actinomyces gerencseriae	0	0	0	0	0	0	0	0	0	0	0	0	0	0	1.00326	0	0	0	0	0.087699	0.0562724	0	0.222247	0.12208	1.69002	0	0	0	0.0503222	0	0	0.990631	0	0	0	0	0	0	0.0625586	0.078809	0	0	0	0.0529795	0	0	0	0
CT65	Catonella morbi	0	0	0	0	0	0	0	0	0	0	0	0	0	0	0	0	0	0	0	0	0	0	0	0	0	0	0	0	0	0	0	0	0	0	0	0	0	0	0	0	0	0	0	0	0	0	0	0
CT66	Streptococcus sobrinus	0	0	0	0	0	0	0	0	0	0	0	1.16576	0	0	0	0	0	0	0	0	0	0	0	0	0	0	0	0	0	0	0	0	0	0	0	0	0	0	0	0	0	0	0	0	0	0	0	0
CT67	Neisseria gonorrhoeae	0	0	0	0	0	0	0	0	0	0	0	0	0	0	0	0	0	0	0	0	0	0.0760032	0	0	0	0	0	0	0	0	0	0	0	0	0	0	0	0	0	0	0	0	0	0	0	0	0	0
CT68	Pseudomonas aeruginosa	0	0	0	0	0	0	0	0	0	0	0	0	0	0	0	0	0	0	0	0	0	0	0	0	0	0	0	0	0	0	0	0	0	0	0	0	0	0	0	0	0	0	0	0	0	0	0	0
CT69	Desulfovibrio fairfieldensis	0	0	0	0	0	0	0.0646619	0	0	0	0	0	0	0	0	0	0	0	0	0	0	0	0	0	0	0	0	0	0	0	0	0	0	0	0	0	0	0	0	0	0	0	0	0	0	0	0	0
CT70	Fusobacterium necrophorum	0	0	0	0	0	0	0	0	0	0	0	0	0	0	0	0	0	0	0	0	0	0	0	0	0	0	0	0	0	0	0	0	0	0	0	0	0	0	0	0	0	0	0	0	0	0	0	0
CT71	Oribacterium parvum	0	0	0	0	0	0	0	0.0781768	0	0	0	0	0	0	0	0.180093	0	0	0	0	0	0	0	0	0	0	0	0	0	0	0	0	0.118793	0	0.138053	0	0	0	0.104264	0	0	0	0	0	0	0	0	0
CT72	Parascardovia denticolens	0	0	0	0	0	0	0	0	0	0	0	0	0	0	0	0	0	0	0	0	0	0	0	0	0	0	0	0	0	0	0	0	0	0	0	0	0	0	0	0	0	0	0	0	0	0	0	0
CT73	Acinetobacter baumannii	0	0	0	0	0	0	0.0579728	0	0	0	0	0	0	0	0	0	0	0	0	0	0	0	0	0	0	0	0	0	0	0	0	0	0	0	0	0	0	0	0.0539298	0	0	0	0	0	0	0	0	0.0917065
CT74	Propionibacterium acnes	0	0	0	0	0	0	0.115946	0.10783	0	0	0	0.123688	0	0	0.27852	0.0828012	0.103299	0	0	0	0	0	0	0	0.388957	0	0.0717888	0	0	0	0	0	0.0546177	0	0	0.0772693	0	0	0.0719064	0	0.080056	0	0	0.588661	0	0	0	0
CT75	Anaerococcus prevotii	0	0	0	0	0	0	0	0	0	0	0	0	0	0	0.159416	0	0	0	0	0	0	0	0	0	0	0	0	0	0	0	0	0	0	0	0	0	0	0	0	0	0	0	0	0	0	0	0	0
CT76	Leptotrichia sp.	0.171366	0	0	0.0916905	0	0	0	0	0	0	0	0.0717392	0.12702	0	0	0	0	0.251426	0.0728803	0.225353	0.0562724	0.0608026	0.111124	0	0	0	0	0.0604941	0	0.0864649	0.146547	0	0.0633565	0	0.205107	0	0.398714	0	0	0	0	0	0	0	0.19672	0	0	0.274814
CT77	Leptotrichia hongkongensis	0.234501	0.117603	0	0	0.998784	0.183402	0.0672484	0	0.367631	0	0.336364	0.143478	0	0	0.0595154	0	0	0.58666	0	1.25554	0	0.0608026	0	0	0.0563988	0	0	0.145186	0	7.25344	0.390791	0.061124	0.158391	0	0.709985	0.431356	2.25655	0.128406	0.166823	0	0	0	0	0	1.04917	0.102298	0	0
CT78	TM7 [G-1] sp.	0	0	0	0	0	0	0	0	0	0	0	0	0	0	0	0	0	0	0	0	0	0	0	0	0	0	0	0	0	0	0	0	0	0	0	0	0	0	0	0	0	0	0	0	0	0	0	0
CT79	Achromobacter xylosoxidans	0	0	0	0	0	0	0	0	0	0	0	0	0	0	0.240896	0	0.0748917	0	0	0	0	0	0	0	0	0	0	0	0	0	0	0	0	0	0	0	0	0	0	0	0	0	0	0	0	0	0	0
CT80	Streptococcus vestibularis; S. salivarius	0	0	0.0633125	0.229226	0	1.77289	0.0840605	0.208471	0.0765898	0	0	1.01631	0	0.113282	0.906902	0.120062	0.12482	0	0	0	0	0	0.092603	0	0	0.39655	0	0	0	0	0	0	1.14834	0	0.276105	0.0886987	0.247429	0	0.417057	0	0.174122	1.31138	0.542588	2.21717	0.0546444	0.103008	0	0
CT81	Treponema sp.	0	0	0	0	0	0	0	0	0	0	0	0	0	0	0	0	0	0	0	0	0	0	0	0	0	0	0	0	0	0	0	0	0	0	0	0	0	0	0	0	0	0	0	0	0	0	0	0
CT82	Alloprevotella sp.	0	0	0.15195	0	0	0.183402	0	0.482462	0	0.844396	0	0	0.197468	1.06392	0	0.144074	0	0.0649944	0.583043	0.579479	0.0964669	0	0	0	0	0.0594825	2.36085	0	2.23727	0.273119	0.0651319	0.170274	0.391453	0	1.19458	0.380137	0.127249	0	0.539195	0	0.729653	0.24579	0.361094	0.429456	0	0.95539	0	0
CT83	Treponema sp.	0	0	0	0	0	0	0	0	0	0	0	0	0	0	0	0	0	0	0	0	0	0	0	0	0	0	0	0	0	0	0	0	0	0	0	0	0	0	0	0	0	0	0.0568651	0	0	0	0	0
CT84	Mogibacterium neglectum	0	0	0	0	0	0	0	0	0	0	0	0	0	0	0	0	0	0	0	0	0	0	0	0	0	0	0	0	0	0	0	0	0	0	0	0	0	0	0	0	0	0	0	0	0	0	0	0
CT85	Erythromicrobium ramosum	0	0	0	0	0	0	0.168121	0	0	0	0	0	0	0	0	0	0	0	0	0	0	0	0	0	0	0	0	0	0	0	0	0	0	0	0	0	0	0	0	0	0	0	0	0.083274	0	0	0	0
CT86	Bergeyella sp.	0	0	0.5065	0	0	0	0	0	0	1.99501	0	0	2.07964	0	0	1.44074	0	1.65622	0	0	0	0.202675	0	0	0	0	0	0	0	1.02477	0.62418	0	9.45068	0	0	0	0	0	0	0	0	0.454611	0	0	0	0	0	0
CT87	Enterobacter cancerogenus	0	0	0	0	0	0	0	0	0	0	0	0	0	0	0.0743943	0	0	0	0	0	0	0	0	0	0	0	0	0	0	0	0	0	0	0	0	0	0	0	0	0	0	0	0	0	0	0	0	0
CT88	Lactobacillus johnsonii	0	0	0	0	0	0	0	0	0	0	0	0	0	0	0	0	0	0	0	0	0	0	0	0	0	0	0	0	0	0	0	0	0	0	0	0	0	0	0	0	0	0	0	0	0	0	0	0
CT90	Lachnospiraceae [G-7] sp.	0	0	0	0	0	0	0	0	0	0	0	0	0	0	0	0	0	0	0	0	0	0	0	0	0	0	0	0	0	0	0	0	0	0	0	0	0	0	0	0	0	0	0	0	0	0	0	0
CT91	Treponema sp.	0	0	0	0	0	0	0	0	0	0	0	0	0	0	0	0	0	0	0	0	0	0	0	0	0	0	0	0	0	0	0	0	0	0	0	0	0	0	0	0	0	0	0	0	0	0	0	0
CT92	Gemella bergeri	0	0	0	0	0	0	0	0	0	0	0	0	0	0	0	0	0	0	0	0	0	0	0	0	0	0	0	0	0	0	0	0	0	0	0	0	0	0	0	0	0	0	0	0	0	0	0	0
CT93	Peptostreptococcaceae [XI][G-4] sp.	0	0	0	0	0	0	0	0	0	0	0	0	0	0	0	0	0	0	0	0	0	0	0	0	0	0	0	0	0	0	0	0	0	0	0	0	0	0	0	0	0	0	0	0	0	0	0	0
CT94	Peptostreptococcaceae [XI][G-1] infirmum	0	0	0	0	0	0	0	0	0	0	0	0	0	0	0	0	0	0	0	0	0	0	0	0	0	0	0	0	0	0	0	0	0	0	0	0	0	0	0	0	0	0	0	0	0	0	0	0
CT95	Corynebacterium tuscaniense	0	0	0	0	0	0	0	0	0	0	0	0	0	0	0	0	0	0	0	0	0	0	0	0	0	0	0	0	0	0	0	0	0	0	0	0	0	0	0	0	0	0	0	0	0	0	0	0
CT96	Microbacterium flavescens	0	0	0	0	0	0	0.168121	0	0	0	0	0	0	0	0	0	0	0	0	0	0	0	0	0	0	0	0	0	0	0	0	0	0	0	0	0.0560202	0	0	0.104264	0.0656742	0	0	0	0.0520462	0	0	0	0
CT97	Stomatobaculum longum	0	0	0	0	0	0	0	0	0	0	0	0	0	0.194197	0	0.120062	0	0	0	0	0	0	0	0	0	0	0	0	0	0	0	0	0	0	0	0.0560202	0	0	0	0	0.116081	0	0	0	0	0	0	0
CT98	Propionibacterium propionicum	0	0.73502	0.189938	0	0.960369	3.39294	0.336242	0	0	0.054608	0	0	0	0	0	0.780401	0	0.299316	0	0.0804833	0	0	0.277809	0	0	0	0.0728657	0.196606	0	0	0	0.191013	0	0	0	0	0	0.770435	0	0	0	0	0	1.70712	0	0.362305	0	0.221624
CT99	TM7 [G-1] sp.	0	0	0	0	0	0	0	0	0	0	0	0	0	0	0	0	0.0748917	0	0	0	0	0	0	0	0	0	0	0	0	0	0	0	0	0.296536	0	0	0	0	0	0	0	0	0	0	0	0	0	0
CT100	Pedobacter sp.	0	0	0	0	0	0	0	0	0	0	0	0	0	0	0.396769	0	0	0	0	0	0	0	0	0.0610401	0	0	0	0	0	0	0	0	0.0527971	0.19769	0	0	0	0	0	0	0	0	0	0.0902135	0	0	0	0
CT101	Leptotrichia hofstadii	0.631348	0	0	0.0916905	0	0	0.0672484	0	0.0919077	0	0	0	0	0	0	0	0	0.0957812	0	0	0.0562724	0	0	0	1.46637	0	0	0	0	0.634076	0	0	0.0791957	0	0	0	0	0	0.187676	0	0	0	0	0	0.131147	0	0	0
CT102	Bifidobacterium subtile	0	0	0	0	0	0	0	0	0	0	0	0	0	0	0	0	0	0	0	0	0	0	0	0	0	0	0	0	0	0	0	0	0	0	0	0	0	0	0	0	0	0	0	0	0	0	0	0
CT103	Ralstonia pickettii	0	0	0	0	0	0	0	0	0	0	0	0	0	0	0	0	0	0	0	0	0	0	0.123471	0	0.0626653	0	0	0	0	0	0	0	0	0	0	0	0	0	0	0	0	0	0	0	0	0	0	0
CT104	Lactobacillus plantarum	0	0	0	0	0	0	0	0	0	0	0	0	0	0	0	0	0	0	0	0	0	0	0	0	0	0	0	0	0	0	0	0	0	0	0	0	0	0	0	0	0	0	0	0	0	0	0	0
CT105	Neisseria sp.	0	0	0	0	0	0	0	0.0781768	0	0	0	0	0	0	0	0	0	5.2979	0	0	0	0	0	0.0915602	0	0	0	0.310032	0	0	0	0	0	0	0	0	0	0	0	0	0	0.157365	0	0	0	0	0	0
CT106	Mycoplasma buccale	0	0	0	0	0	0	0	0	0	0	0	0	0	0	0	0	0	0	0	0	0	0	0	0	0	0	0	0	0	0	0	0	0	0	0	0	0	0	0	0	0	0	0	0	0	0	0	0
HMT1	Bartonella schoenbuchensis	0	0	0	0	0	0	0	0	0	0	0	0	0	0	0	0	0	0	0	0	0	0	0	0	0	0	0	0	0	0	0	0	0	0	0	0	0	0	0	0	0	0	0	0	0	0	0	0
HMT2	Caulobacter sp.	0	0	0	0	0	0	0.336242	0	0	0	0	0	0.112077	0	0.403855	0	0.0748917	0	0	0	0	0	0	0	0.422991	0	0	0	0	0	0	0	0.0791957	0	0	0	0	0	0.364925	0	0	0.0524551	0	0.0936832	0	0	0	0
HMT3	Sphingomonas echinoides	0	0	0	0	0	0	0	0	0	0	0	0	0	0	0.552643	0	0	0	0	0	0	0	0	0	0	0	0	0	0	0	0	0	0	0	0	0	0	0	0	0	0	0	0	0	0	0	0	0
HMT4	Sphingomonas sp.	0	0	0	0	0	0	0.252182	0	0	0	0	0	0.149435	0	0.297577	0.0600308	0	0	0	0	0.140681	0	0	0	0	0	0	0	0	0	0	0	0.0791957	0	0	0	0	0	0	0	0.0580406	0	0	0.13532	0	0	0	0
HMT5	Sphingomonas sp.	0	0	0	0	0	0	0.0560404	0	0	0	0	0	0	0	0	0	0	0	0	0	0	0	0	0	0	0	0	0	0	0	0	0	0	0	0	0	0	0	0	0	0	0	0	0.055516	0	0	0	0
HMT6	Sphingomonas sp.	0	0	0	0	0	0	0	0	0	0	0	0	0	0	0	0	0	0	0	0	0	0	0	0	0	0	0	0	0	0	0	0	0	0	0	0	0	0	0	0	0	0	0	0	0	0	0	0
HMT13	Neisseria bacilliformis	0	0	0	0	0.480184	0	0	0.0781768	0.229769	0	0.234178	0	0	0	0	0	0	0	0.0546603	0	0	4.40819	0	0	0.0704985	0	0	0.0604941	0	0	0	1.60451	0	0	0.177496	0	0.201478	0	0	0.394045	0	0	0	0	0	0.0532802	0	0
HMT14	Neisseria oralis	0	0.931026	0	0	5.08995	40.1192	0	0.0781768	0	1.40343	0	0.44837	0.102737	0	0	0.0600308	0.486796	3.9809	0	0	2.32123	0.0760032	0.138904	3.02149	0	0	0.577721	11.2141	0	1.9935	1.60794	6.0551	1.60371	0.0741339	0	0.119043	0	2.66442	0.0521322	0.0656742	0	2.25557	0	7.84857	0	0	0	0
HMT20	Neisseria sp.	0	0	0	0	0	0.091701	0	0	0	0	0	0	0	0	0	0	0	0.28435	0	0	0	0	0	0	0	0	0	0	0	0	0	0	0	0.0741339	0	0	0	0	0	0	0	0	0	0	0	0	0	0
HMT22	Lautropia mirabilis	0	0.304897	0	1.98663	1.92074	1.28381	14.7386	0.104236	1.22544	0.152902	0.106444	0.836957	0.261512	0	0	0.400206	0.973593	1.77594	0.558749	0.858488	0.187575	21.0782	1.48165	0.244161	5.63988	0.743531	1.56141	2.3391	0	0	0.271383	1.37529	0.422377	25.2055	0.0788873	0.68158	1.3856	0.87744	0.104264	4.24693	0	0.559521	0.099514	0.853558	0.655733	2.95527	0.080693	0
HMT23	Delftia acidovorans	0	0	0	0	0	0	0.470739	0.187624	0	0	0	0	0.0896613	0	0.357092	0	0	0	0	0	0	0	0.111124	0	0.281994	0	0	0	0	0	0	0	0	0.0593071	0	0	0	0	0.187676	0	0	0	0	0	0	0	0	0
HMT24	Schlegelella thermodepolymerans	0	0	0	0	0	0	0	0	0	0	0	0	0	0	0	0	0	0	0	0	0	0	0	0	0	0	0	0	0	0	0	0	0	0	0	0	0	0	0	0	0	0	0	0	0	0	0	0
HMT25	Leptothrix sp.	0	0	0	0	0	0	0.672484	0	0	0	0	0	0	0	0.340088	0.360185	0.0748917	0	0	0	0	0	0	0	0	0	0	0	0	0	0	0	0	0	0	0	0	0	1.04264	0	0	0	0	0	0	0	0	0
HMT26	Schlegelella aquatica	0	0	0	0	0	0	0.168121	0	0	0	0	0	0	0	0	0	0	0	0	0	0	0	0	0	0	0	0	0	0	0	0	0	0	0	0	0	0	0	0	0	0.116081	0	0	0	0	0	0	0
HMT27	Cupriavidus gilardii	0	0	0	0	0	0	0.168121	0	0	0	0	0	0	0	0	0	0	0	0	0	0	0	0	0	0	0	0	0	0	0	0	0	0	0	0	0	0	0	0	0	0	0.0524551	0	0	0	0	0	0
HMT28	Rhodocyclus sp.	0	0	0	0	0	0	0.0840605	0	0	0	0	0	0	0	0	0	0	0	0	0	0	0	0	0	0	0	0	0	0	0	0	0	0	0	0	0	0	0.0642029	0	0	0	0	0	0	0	0	0	0
HMT32	Pseudomonas sp.	0	0	0	0	0	0	0.0840605	0	0	0	0	0	0	0	0	0.0900463	0	0	0	0	0	0	0	0	0	0	0	0	0	0	0	0	0	0	0	0	0	0	0	0	0	0	0	0	0	0	0	0
HMT37	Stenotrophomonas nitritireducens	0	0	0.284906	1.83381	0.384148	0.504356	10.0873	6.09779	0.574423	1.29421	0.282078	4.125	1.4103	0.169923	8.94857	0.810416	1.34805	0.254419	1.0021	0.402416	0.211021	0.532023	3.61152	0	0.563988	0.892238	0.697429	0	0.717848	0	0	0.0764051	1.36613	1.03787	0.709985	0.490177	0.148457	0.0963044	14.206	0	1.10277	0.917964	0.0888517	3.34657	0	0.479522	0	0
HMT38	Olsenella uli	0	0	0	0	0	0	0	0	0	0	0	0	0	0	0	0	0	0	0	0	0	0	0	0	0	0	0	0	0	0	0	0	0	0	0	0	0	0	0	0	0	0	0	0	0	0	0	0
HMT39	Bdellovibrio sp.	0	0	0	0	0	0	0	0	0	0.109216	0	0	0.0747177	0	0.106278	0	0	0	0	0	0	0	0	0	0	0	0.104094	0	0	0	0	0	0	0	0	0	0	0	0	0	0	0.0524551	0	0.13532	0	0	0	0
HMT41	Desulfobulbus sp.	0.112741	0	0	0	0	0	0.168121	0	0	0	0	0	0	0	0	0	0	0	0	0	0	0	0	0	0	0	0	0	0	0	0	0	0	0	0	0	0	0	0	0	0	0	0	0	0	0	0	0
HMT44	Campylobacter sp.	0	0	0	0	0	0	0	0	0	0	0	0	0	0	0	0	0	0	0	0	0	0	0	0	0	0	0	0	0	0	0	0	0	0	0	0	0	0	0	0	0	0	0	0	0	0	0	0
HMT45	Bacillus clausii	0	0	0.217071	0	0	0	0	0	0	0	0	0	0	0	0	0.30873	0	0	0	0	0	0	0	0	0	0	0	0	0	0	0	0	0	0	0	0	0	0	0	0	0	0	0	0	0	0	0	0
HMT48	Paenibacillus sp.	0	0	0	0	0	0	0	0	0	0	0	0	0	0	0	0	0	0	0	0	0	0	0	0	0	0	0	0	0	0	0	0	0	0	0	0	0	0	0	0	0	0	0	0	0	0	0	0
HMT75	Ruminococcaceae [G-1] sp.	0	0	0	0	0	0	0	0	0	0	0	0	0	0	0	0	0	0	0	0	0	0	0	0	0	0	0	0	0	0	0	0	0	0	0	0	0	0	0	0	0	0	0	0	0	0	0	0
HMT78	Oribacterium sp.	0	0	0	0.916905	0	0	0	0	0	0	0	0	0	0	0	0	0	0	0	0	0	0	0	0.366241	0	0	0	0	0	0	0.0814148	0	0	0	0	0	0	0.0642029	0	0	0	0	0	0	0	0	0	0
HMT80	Butyrivibrio sp.	0	0	0	0	0	0	0	0	0	0	0	0	0	0	0	0	0	0	0	0	0	0	0	0	0	0	0	0	0	0	0	0	0	0	0	0	0	0	0	0	0	0	0	0	0	0	0	0
HMT81	Peptostreptococcaceae [XI][G-7] sp.	0	0	0	0	0	0	0	0	0	0	0	0	0	0	0	0	0	0	0	0	0	0	0	0	0	0	0	0	0	0	0	0	0	0	0	0	0	0	0	0	0	0	0	0	0	0	0	0
HMT83	Lachnoanaerobaculum sp.	0	0	0	0	0	0	0	0	0	0	0	0	0	0	0	0	0	0	0	0	0	0	0	0	0	0	0	0	0	0	0	0	0	0	0	0	0	0	0	0	0	0	0	0	0	0	0	0
HMT85	Ruminococcaceae [G-2] sp.	0	0	0	0	0	0	0	0	0	0	0	0	0	0	0	0	0	0	0	0	0	0	0	0	0	0	0	0	0	0	0	0	0	0	0	0	0	0	0.0521322	0	0	0	0	0	0	0	0	0
HMT88	Lachnospiraceae [G-2] sp.	0	0	0	0	0	0	0	0	0	0	0	0	0	0	0	0	0	0	0	0	0	0	0	0	0	0	0	0	0	0	0	0	0	0	0	0	0	0	0	0	0	0	0	0	0	0	0	0.373067
HMT89	Lachnoanaerobaculum sp.	0	0	0	0	0	0	0	0	0	0	0	0	0	0	0	0	0	0	0	0	0	0	0	0	0	0	0	0	0	0	0	0	0	0	0	0	0	0	0	0	0	0	0	0	0	0	0	0
HMT90	Butyrivibrio sp.	0	0	0	0	0	0	0	0	0	0	0	0	0	0	0	0	0	0	0	0	0	0	0	0	0	0	0	0	0	0	0	0	0	0	0	0	0	0	0	0	0	0	0	0	0	0	0	0
HMT91	Peptostreptococcaceae [XI][G-2] sp.	0	0	0	0	0	0	0	0	0	0	0	0	0	0	0	0	0	0	0	0	0	0	0	0	0	0	0	0	0	0	0	0	0	0	0	0	0	0	0	0	0	0	0	0	0	0	0	0
HMT93	Clostridiales [F-1][G-1] sp.	0	0	0	0	0	0	0	0	0	0	0	0	0	0	0	0	0	0	0	0	0	0	0	0	0	0	0	0	0	0	0	0	0	0	0	0	0	0	0	0	0	0	0	0	0	0	0	0
HMT94	Lachnospiraceae [G-10] sp.	0	0.163338	7.5975	0	0	0	0	0	0	0	0	0	0	0	0.255066	9.48487	0	0	0	0	0	0	0	0	0	0	0	0	0	0	0	0	0	0	0	0	0	0	0	0	0	0	0	0	0	0	0	0
HMT95	Shuttleworthia satelles	0	0	0	0	0	0	0	0	0	0	0	0	0	0	0	0	0	0	0	0	0	0	0	0	0	0	0	0	0	0	0	0	0	0	0	0	0	0	0	0	0	0	0	0	0	0	0	0
HMT96	Lachnospiraceae [G-2] sp.	0	0	0	0	0	0	0	0	0	0	0	0	0	0	0	0	0	0	0	0	0	0	0	0	0	0	0	0	0	0	0	0	0	0	0	0	0	0	0	0	0	0	0	0	0	0	0	0
HMT97	Stomatobaculum sp.	0	0	0	0	0	0	0	0	0	0	0	0	0	0	0	0	0	0	0.0728803	0	0	0	0	0	0	0.148706	0	0	0.101343	0	0	0	0.0791957	0	0.0788873	0	0	0	0	0	0	0	0	0	0	0	0	0
HMT100	Lachnospiraceae [G-3] sp.	0	0	0	0	0	0	0	0	0	0	0	0	0	0	0	0	0	0	0	0	0	0	0	0	0	0	0	0	0	0	0	0	0	0	0	0	0	0	0	0	0	0	0	0	0	0	0	0
HMT102	Oribacterium sp.	0	0	0	0	0	0	0	0	0	0	0	0	0	0	0	0	0	0	0	0	0	0	0	0	0	0	0	0	0	0	0	0	0	0	0	0	0	0	0	0	0	0	0	0	0	0	0	0
HMT107	Lachnoanaerobaculum umeaense	0	0	0	0	0	0	0	0.104236	0	0	0	0	0	0	0	0	0	0	0	0	0	0	0	0	0	0	0	0	0	0	0	0	0	0	0	0	0	0	0	0	0	0	0	0	0	0	0	0.565141
HMT108	Oribacterium asaccharolyticum	0	0	0	0	0	0	0	0	0	0	0	0	0	0	0	0	0	0	0	0	0	0	0	0	0	0	0	0	0	0	0	0	0	0	0	0	0	0	0	0	0.0580406	0	0	0	0	0	0	0
HMT113	Peptoniphilaceae [G-1] sp.	0	0	0	0	0	0	0	0	0	0	0	0	0	0	0	0	0	0	0	0	0	0	0	0	0	0	0	0	0	0	0	0	0	0	0	0	0	0	0	0	0	0	0	0	0	0	0	0
HMT118	Dialister invisus	0.0515386	0	0	0	0	0	0	0	0	0	0	0	0	0.0693562	0	0	0	0	0	0	0	0	0	0	0	0	0	0	0	0	0	0.0873201	0	0	0	0	0	0	0.0893694	0	0	0	0	0	0	0	0	0
HMT119	Dialister sp.	0	0	0	0	0	0	0	0	0	0	0	0	0	0	0	0	0	0	0	0	0	0	0	0	0	0	0	0	0	0	0	0	0	0	0	0	0	0	0	0	0	0	0	0	0	0	0	0
HMT121	Anaeroglobus geminatus	0	0	0	0	0	0	0	0	0	0	0	0	0	0	0	0	0	0	0	0	0	0	0	0	0	0	0	0	0	0	0	0	0	0	0	0	0	0	0	0	0	0	0	0	0	0	0	0
HMT122	Megasphaera micronuciformis	0	0	0	0	0	0	0	0	0	0	0	0.0512423	0	0	0	0	0	0	0	0	0	0	0	0	0	0	0	0	0	0	0	0	0	0	0	0	0	0	0	0	0	0	0	0	0	0	0	0
HMT123	Megasphaera sp.	0	0	0	0	0	0	0	0	0	0	0	0	0	0	0	0	0	0	0	0	0	0	0	0	0	0	0	0	0	0	0	0	0	0	0	0	0	0	0	0	0	0	0	0	0	0	0	0
HMT131	Mitsuokella sp.	0	0	0	0	0	0	0	0	0	0	0	0	0	0	0	0	0	0	0	0	0	0	0	0	0	0	0	0	0	0	0	0	0	0	0	0	0	0	0	0	0	0	0	0	0	0	0	0
HMT166	Johnsonella sp.	0	0	0	0	0	0	0	0	0	0	0	0	0	0	0	0	0	0	0	0	0	0	0	0	0	0	0	0	0	0	0	0	0	0	0	0	0	0	0	0	0	0	0	0	0	0	0	0
HMT179	Actinomyces timonensis	0	0	0	0	0	0.183402	0.0840605	0	0	0	0	0	0	0	0	0	0	0	0	0	0	0	0	0	0	0	0	0	0	0	0	0	0	0	0	0	0	0	0	0	0	0	0	0	0	0	0	0
HMT183	Actinobaculum sp.	0	0	0	0	0	0	0	0	0	0	0	0	0	0.0849614	0	0	0	0	0	0.24145	0	0	0	0	0.140997	0	0	0.347841	0	0.132099	0.0814148	0	0	0	0	0.399144	0	0	0	0	0	0	0	0	0	0	0	0
HMT189	Kocuria sp.	0	0	0	0	0.768295	0	0.112081	0	0	0	0	0	0	0	0	0	0	0	0	0	0	0	0	0	0	0	0	0	0	0	0	0	0	0	0	0.756273	0.0848328	0	0.104264	0.218914	0.657793	0.419641	0	0.13185	0	0	0	0
HMT190	Arsenicicoccus bolidensis	0	0	0	0	0	0	0	0	0	0	0	0	0	0	0	0	0	0	0	0	0	0	0	0	0	0	0	0	0	0	0	0	0	0	0	0	0	0	0	0	0	0	0	0	0	0	0	0
HMT191	Propionibacterium acidifaciens	0	0	0	0	0	0	0	0	0	0	0	0	0	0	0	0	0	0	0	0	0	0	0	0	0	0	0	0	0	0	0	0	0	0	0	0	0	0	0	0	0	0	0	0	0	0	0	0
HMT192	Propionibacterium sp.	0	0	0	0	0	0	0	0	0	0	0	0	0	0	0	0	0	0	0	0	0	0	0	0	0	0	0	0	0	0	0	0	0	0	0	0	0	0	0	0	0	0	0	0	0	0	0	0
HMT195	Scardovia wiggsiae	0	0	0	0	0	0	0.0646619	0	0	0	0	0	0	0	0	0	0	0	0	0	0	0	0	0	0	0	0	0	0	0	0	0	0	0	0	0	0	0	0	0	0	0	0	0	0	0	0	0
HMT198	Alloscardovia omnicolens	0	0	0	0	0	0	0	0	0	0	0	0	0	0	0	0	0	0	0	0	0	0	0	0	0	0	0	0	0	0	0	0	0	0	0	0	0	0	0	0	0	0	0	0	0	0	0	0
HMT199	Atopobium sp.	0	0	0	0	0	0	0	0	0	0	0	0	0	0	0	0	0	0	0	0	0	0	0	0	0	0	0.104094	0	0	0	0	0	0	0	0	0	0	0	0	0	0	0	0	0	0	0	0	0
HMT214	Leptotrichia shahii	0	0	0	0	0	0	0	0	0	0	0	0	0	0	0	0	0	0	0	0	0	0	0	0	0	0	0	0	0	0	0	0	0	0	0	0	0	0	0	0	0	0	0	0	0	0	0	0
HMT215	Leptotrichia sp.	0	0	0	0	0	0	0	0	0	0	0	0	0	0.0679691	0	0	0	0	0	0	0	0.0608026	0	0	0	0	0	0	0	0	0	0	0	0	0	0	0	0	0	0	0	0	0	0	0	0	0	0
HMT218	Leptotrichia sp.	0	0	0	0	0	0	0	0	0	0	0	0	0	0	0	0	0	0	0	0	0	0	0	0	0	0	0	0	0	0	0	0	0	0	0	0	0	0	0	0	0	0	0	0	0	0	0	0
HMT219	Leptotrichia sp.	0	0	0	0	0	0	0	0	0	0	0	0	0	0	0	0	0	0	0	0	0.0562724	0	0.111124	0	0	0	0	0.223828	0	0	0	0	0	0	0	0	0	0.680551	0	0	0	0	0	0	6.55733	0	0	0
HMT221	Leptotrichia sp.	0	0	0	0	0	0	0	0	0	0	0	0	0	0	0	0	0	0	0	0	0.0562724	0	0.111124	0	0	0.0594825	0	0	0	0	0	0	0	0	0.0631098	0	0	0	0.104264	0	0	0	0	0	0	0	0	0
HMT223	Leptotrichia sp.	0	0	0	0	0	0	0	0	0	0	0	0	0	0	0	0	0	0	0	0.611673	0	0	0	0	0	0	0	0	0	0	0	0	0	0	0	0	0	0	0	0	0	0	0	0	0	0	0	0
HMT225	Leptotrichia sp.	0	0	0	0.275071	0	0	0	0	0	0	0	0	0.0597742	0	0	0	0	0.0838085	0	0.19316	0	0.0608026	0	0	0.0563988	0	0	0	0	2.05594	0	0	0	0	0	0	0.178149	0	0.0834114	0	0	0	0	0	0	0	0	0
HMT227	Treponema sp.	0	0	0	0	0	0	0	0	0	0	0	0	0	0	0	0	0	0	0	0	0	0	0	0	0	0	0	0	0	0	0	0	0	0	0	0	0	0	0	0	0	0	0	0	0	0	0	0
HMT232	Treponema sp.	0	0	0	0	0	0	0	0	0	0	0	0	0	0	0	0	0	0	0	0	0	0	0	0	0	0	0	0	0	0	0	0	0	0	0	0	0	0	0	0	0	0	0	0	0	0	0	0
HMT234	Treponema sp.	0	0	0	0	0	0	0	0	0	0	0	0	0	0	0	0	0	0	0	0	0	0	0	0	0	0	0	0	0	0	0	0	0	0	0	0	0	0	0	0	0	0	0	0	0	0	0	0
HMT238	Treponema sp.	0	0	0	0	0	0	0	0	0	0	0	0	0	0	0	0	0	0	0	0	0	0	0	0	0	0	0	0	0	0	0	0	0	0	0	0	0	0	0	0	0	0	0	0	0	0	0	0
HMT239	Treponema sp.	0	0	0	0	0	0	0	0	0	0	0	0	0	0	0	0	0	0	0	0	0	0	0	0	0	0	0	0	0	0	0	0	0	0	0	0	0	0	0	0	0	0	0	0	0	0	0	0
HMT249	Treponema sp.	0	0	0	0	0	0	0	0	0	0	0	0	0	0	0	0	0	0	0	0	0	0	0	0	0	0	0	0	0	0	0	0	0	0	0	0	0	0	0	0	0	0	0	0	0	0	0	0
HMT252	Treponema sp.	0	0	0	0	0	0	0	0	0	0	0	0	0	0	0	0	0	0	0	0	0	0	0	0	0	0	0	0	0	0	0	0	0	0	0	0	0	0	0	0	0	0	0	0	0	0	0	0
HMT253	Treponema sp.	0	0	0	0	0	0	0	0	0	0	0	0	0	0	0	0	0	0	0	0	0	0	0	0	0	0	0	0	0	0	0	0	0	0	0	0	0	0	0	0	0	0	0	0	0	0	0	0
HMT254	Treponema sp.	0	0	0	0	0	0	0	0	0	0	0	0	0	0	0	0	0	0	0	0	0	0	0	0	0	0	0	0	0	0	0	0	0	0	0	0	0	0	0	0	0	0	0	0	0	0	0	0
HMT256	Treponema sp.	0	0	0	0	0	0	0	0	0	0	0	0	0	0	0	0	0	0	0	0	0	0	0	0	0	0	0	0	0	0	0	0	0	0	0	0	0	0	0	0	0	0	0	0	0	0	0	0
HMT257	Treponema sp.	0	0	0	0	0	0	0	0	0	0	0	0	0	0	0	0	0	0	0	0	0	0	0	0	0	0	0	0	0	0	0	0	0	0	0	0	0	0	0	0	0	0	0	0	0	0	0	0
HMT258	Treponema sp.	0	0	0	0	0	0	0	0	0	0	0	0	0	0	0	0	0	0	0	0	0	0	0	0	0	0	0	0	0	0	0	0	0	0	0	0	0	0	0	0	0	0	0	0	0	0	0	0
HMT262	Treponema sp.	0	0	0	0	0	0	0	0	0	0	0	0	0	0	0	0	0	0	0	0	1.61783	0	0	0	0	0	0	0	0	0	0	0	0	0	0	0	0	0	0	0	0	0	0	0	0	0	0	0
HMT265	Treponema sp.	0	0	0	0	0	0	0	0	0	0	0	0	0	0	0	0	0	0	0	0	0	0	0	0	0	0	0	0	0	0	0	0	0	0	0	0	0	0	0	0	0	0	0	0	0	0	0	0
HMT270	Treponema sp.	0	0	0	0	0	0	0	0.0781768	0	0	0	0	0	0	0	0	0	0	0	0	0	0	0	0	0	0	0	0	0	0	0	0	0	0	0	0	0	0	0	0	0	0	0	0	0	0	0	0
HMT271	Treponema sp.	0	0	0	0	0	0	0	0	0	0	0	0	0	0	0	0	0	0	0	0	0	0	0	0	0	0	0	0	0	0	0	0	0	0	0	0	0	0	0	0	0	0	0	0	0	0	0	0
HMT272	Bacteroidaceae [G-1] sp.	0	0	0	0	0	0	0	0	0	0	0	0	0	0	0	0	0	0	0	0	0	0	0	0	0	0	0	0	0	0	0	0	0	0	0	0	0	0	0	0	0	0	0	0	0	0	0	0
HMT274	Bacteroidales [G-2] sp.	1.1725	0.0653352	2.40588	0	0	0	0.0560404	0.208471	0	0	0	0	0	0	0	3.52181	0	0	0	0	0.0937873	0	0	0	0	0	0	0	0	0	0	0	0	0	0	0	0	0	0	0	0	0	0.0805589	0	0	0	0	0
HMT280	Bacteroidetes [G-3] sp.	0	0	0	0	0	0	0	0	0	0	0	0	0	0	0	0	0	0	0	0	0	0	0	0	0	0	0	0	0	0	0	0	0	0	0	0	0	0	0	0	0	0	0	0	0	0	0	0
HMT281	Bacteroidetes [G-3] sp.	0	0	0	0	0	0	0	0	0	0	0	0	0	0	0	0	0	0	0	0	0	0	0	0	0	0	0	0	0	0	0	0	0	0	0	0	0	0	0	0	0	0	0	0	0	0	0	0
HMT288	Prevotella oulorum	0.0901926	0	0	0	0	0	0	0	0	0	0	0	0	0.558318	0	0	0	0	0	0.442658	0	0	0	0	0.0704985	0	0	0	0	0.816613	0	0.229215	0.17819	0	0.0986091	0	0	0	0.182463	0	0.0580406	0	0.380285	0	0	0.426242	0	1.0915
HMT289	Prevotella maculosa	0.372044	0	0	0	0	0	0	0	0.114885	0	0	0	0	0.606867	0	0	0	0	0	0	0.140681	0	0	0	0	0	0	0	0	0	0	0.496633	0	0	0	0	0	0.128406	0	0	0	0	0.398056	0	0	0.0586082	0	0.18284
HMT291	Prevotella denticola	0.146563	0	0	0.114613	0	0	0	0	0	0	0	0.179348	0	0	0	0	0	0	0	0.0804833	0	0	0	0	0	0	0	0	0	0	0	1.20338	0	0	0	0	0	0	0.443123	0	0	0	0	0	0	0	0	0
HMT299	Prevotella nanceiensis	0	0	0.126625	0	0	0.122268	0	2.71013	0.15318	2.62846	0	0	0.373589	2.00671	0.354258	0	0.0748917	0	0	0.107311	0.187575	0	0	0	0	0	1.2977	0	0.720663	0	0.244245	0	0.395978	0	1.44627	0	0	0	0	0	0.735181	0.279761	0	0.388612	0	0.98746	0	0
HMT301	Prevotella sp.	0	0	0	0	0	0	0	0	0	0	0	0	0	0	0	0	0	0	0	0	0	0	0	0	0	0	0	0	0	0	0	0	0	0	0	0	0	0	0	0	0	0	0	0	0	0	0	0
HMT302	Alloprevotella rava	0	0	0	0	0	0	0	0	0	0	0	0	0	0.145648	0	0	0	0	0	0	0	0	0	0	0	0	0	0	0	0	0	0.0573038	0	0	0	0	0	0	0	0	0	0	0	0.124911	0	0	0	0
HMT303	Prevotella pleuritidis	0	0	0	0	0	0	0	0	0	0	0	0	0	0	0	0	0	0	0	0	0	0	0.138904	1.09872	0	0	0	0	0	0	0	0	0	0	0	0	0	0	0	0	0	0	0	0	0	0	0	0
HMT304	Prevotella sp.	0	0	0	0	0	0	0	0	0	0	0	0	0	0	0	0	0	0	0	0	0	0	0	0	0	0	0	0	0	0	0	0	0	0	0	0	0	0	0	0	0	0	0	0	0	0	0	0
HMT305	Prevotella sp.	0	0	0	0	0	0	0	0	0	0	0	0	0	0	0	0	0	0	0	0	0	0	0	0	0	0	0	0	0.0506716	0	0	0	0	0	0	0	0	0	0	0	0	0	0	0	0	0	0	0
HMT307	Prevotella salivae	0	0	0	0	0	0	0	0	0	0	0	0.089674	0	0.157785	0	0	0	0	0	0	0	0	0	0	0	0	0.124913	0	0.0591169	0.144108	0	0	0.138592	0	0.295827	0	0	0	0	0	0.145102	0	0.177703	0	0	0	0	0.138515
HMT309	Prevotella sp.	0	0	0	0	0	0	0	0	0	0	0	0	0	0	0	0	0	0	0	0	0	0	0	0	0	0	0	0	0	0	0	0	0	0	0	0	0	0	0	0	0	0	0	0	0	0	0	0
HMT311	Prevotella oris	0.529882	0	0	0.687678	0.480184	0.091701	0	0	0	0	0	0.089674	0	2.13617	0	0	0.112338	0	0	0.684108	1.47715	0	0	1.23606	0	0	0	0	0	0	0	3.38092	0.415777	0	0.0788873	0	0	3.30645	0.443123	0	0.174122	0	1.37187	0	0	0	0	0.083109
HMT315	Prevotella sp.	0	0	0	0	0	0	0	0	0	0	0	0	0	0	0	0	0	0	0	0	0	0	0	0	0	0	0	0	0	0	0	0	0	0	0	0	0	0	0	0	0	0	0	0	0	0	0	0
HMT317	Prevotella sp.	0	0	0	0	0	0	0	0	0	0	0	0	0	0	0	0	0	0	0	0.837026	0	0	0	0.585985	0.620387	0	0	0	0	0	0	0.137529	0	0	0	0	0	0	0	0	0	0	0	0	0	0	0	0.288111
HMT318	Pedobacter sp.	0	0	0	0	0	0	0	0	0	0	0	0	0	0	0	0	0	0	0	0	0	0	0	0	0	0	0	0	0	0	0	0	0	0	0	0	0	0	0	0	0	0	0	0	0	0	0	0
HMT319	Bergeyella sp.	0	0	0	0	0	0	0	0	0	0	0	0	0	0	0.311747	0	0.12482	0	0	0	0	0.101338	0	0	0	0	0	0	0	0	0	0	0	0	0	0	0	0	0	0	0	0	0	0.284519	0	0	0	0
HMT320	Flavitalea sp.	0	0	0.126625	0	0	0	0.616444	0	0	0	0	0.119565	0	0	0	0	0	0	0	0	0	0	0	0	0	0	0	0	0	0	0	0	0	0	0	0	0	0	0.104264	0	0	0	0	0.464946	0	0	0	0
HMT322	Bergeyella sp.	0	0.631573	0.126625	0.305635	0.128049	0	0.0560404	0.416943	0	0.444145	4.77581	0	0.112077	0.113282	0	0	0.249639	2.13512	0.267228	0.160967	0	0	0	0.0610401	0	0.0991375	0.0902147	4.88994	0.112604	1.02477	0.569904	0.15281	0.237587	0	0.262958	0.457499	0.0848328	0.278213	0.0695095	0.131348	0	0	0	0.13879	3.9344	0.0994564	0.207496	0.258561
HMT326	Capnocytophaga sp.	0.439689	0	0.0949688	0	4.99392	0	0	0	0.114885	0.0655296	0	0	0	0.0970987	0	0	0	0.074829	0	0.523141	0	0	0	0.366241	0	0	0	0	0	0	0	0	0	0	0	0	0	0.0802537	0	0	0	0	0	0.0572509	0	0	0	0
HMT329	Capnocytophaga leadbetteri	3.96847	0	0	0	0	0	0.126091	0	0.229769	0.081912	0.138378	0	0	0	0	0	0	1.0925	0.382622	0	0	1.29206	0	0	0	0.185883	0.0832751	0	0	1.63323	0	0	0	0	0	0.700253	1.85572	0.112355	0	0	0.145102	0	0	0.0728647	0.819666	0.0586082	0	12.0065
HMT332	Capnocytophaga sp.	0	0	0	0	0	0	0	0	0	0	0	0	0	0	0	0	0	0	0	0	0	0.0760032	0	0	0	0	0	0	0	0	0	0	0	0	0	0	0	0	0	0	0	0	0	0	0.0819666	0	0	0
HMT337	Capnocytophaga gingivalis	0.0901926	0.653352	0	0	3.26525	0.091701	0.126091	0	0	0	2.48548	0	0.130756	0.121373	0.690804	0	0	5.94143	0.182201	0	0	0	0	0	0.211496	0	0.218597	0.786423	0	0.216162	0.101769	0.0764051	0	0.0741339	0	0.602218	0	0.288913	0	0	0	0	0	0.150934	3.11473	0.932403	0.138331	0.171759
HMT338	Capnocytophaga sp.	0	0	0	0	0	0	0	0	0	0	0	0	0	0.356029	0	0	0	0	0	0	0	0	0	1.2208	0	0	0	0	0	0	0.868425	0.178278	0	0	0	0	0	0.513623	0	0	0	0	0	0	0	0	0	0
HMT345	SR1 [G-1] sp.	0	0	0	0	0	0	0	0	0	0	0	0	0	0	0	0	0	0	0	0	0	0	0	0	0	0	0	0	0	0	0	0	0	0	0	0	0	0	0	0	0	0	0	0	0	0	0	0
HMT347	TM7 [G-1] sp.	0	0	0	0	0	0	0	0	0	0	0	0	0	0	0	0	0	0	0	0	0	0	0	0	0	0	0	0	0	0	0	0	0	0	0	0	0	0	0	0	0	0	0	0	0	0	0	0
HMT348	TM7 [G-1] sp.	0	0	0	0	0	0	0	0	0	0	0	0	0	0	0	0	0	0	0	0	0	0	0	0	0	0	0	0	0	0	0	0	0.0791957	0	0	0	0	0	0	0	0	0	0	0	0	0	0	0
HMT349	TM7 [G-1] sp.	0	0	0	0	0	0	0	0	0	0	0	0	0	0	0	0	0	0	0	0	0	0	0	0	0	0	0	0	0	0	0	0	0.0791957	0	0	0	0	0	0	0	0	0	0	0.083274	0	0	0	0
HMT350	TM7 [G-2] sp.	0	0	0	0	0	0	0	0	0	0	0	0	0	0	0	0	0	0	0	0	0	0	0	0	0	0	0	0	0	0	0	0	0	0	0	0	0	0	0	0	0	0	0	0	0	0	0	0
HMT351	TM7 [G-3] sp.	0	0	0	0	0	0	0	0	0	0	0	0	0	0	0	0	0	0	0	0	0	0	0	0	0	0	0	0	0	0	0	0	0	0	0	0	0	0	0	0	0	0	0	0	0	0	0	0
HMT355	TM7 [G-4] sp.	0	0	0	0	0	0	0	0	0	0	0	0	0	0	0	0	0	0	0	0	0	0	0	0	0	0	0	0	0	0	0	0	0	0	0	0	0	0	0	0	0	0.10491	0	0	0	0	0	0
HMT356	TM7 [G-5] sp.	0	0	0	0	0	0	0	0	0	0	0	0	0	0	0	0	0	0	0	0	0	0	0	0	0	0	0	0	0	0	0	0	0	0	0	0	0	0	0	0	0	0	0	0	0	0	0	0
HMT357	Pyramidobacter piscolens	0	0	0	0	0	0	0	0	0	0	0	0	0	0	0	0	0	0	0	0	0	0	0	0	0	0	0	0	0	0	0	0	0	0	0	0	0	0	0	0	0	0	0	0	0	0	0	0
HMT363	Fretibacterium fastidiosum	0.240514	0	0	0	0	0	0	0	0	0	0	0	0	0	0	0	0	0	0	0	0	0	0	0	0	0	0	0	0	0	0	0	0	0	0	0	0	0	0	0	0	0	0	0	0	0	0	0
HMT365	Bacteroidetes [G-3] sp.	0	0	0	0	0	0	0	0	0	0	0	0	0	0	0	0	0	0	0	0	0	0	0	0	0	0	0	0	0	0	0	0	0	0	0	0	0	0	0	0	0	0	0	0	0	0	0	0
HMT366	Ruminococcaceae [G-3] sp.	0	0	0	0	0	0	0	0	0	0	0	0	0	0	0	0	0	0	0	0	0	0	0	0	0	0	0	0	0	0	0	0	0	0	0	0	0	0	0	0	0	0	0	0	0	0	0	0
HMT368	Dietzia cinnamea	0	0	0	0	0	0	0	0	0	0	0	0	0	0	0	0	0	0	0	0	0	0	0	0	0	0	0	0	0	0	0	0	0	0	0	0	0	0	0	0	0	0	0	0	0	0	0	0
HMT373	Stomatobaculum sp.	0	0	0	0	0	0	0	0	0	0	0	0	0	0	0	0	0	0	0	0	0	0	0	0	0	0	0	0	0	0	0	0	0	0	0	0	0	0	0	0	0	0	0	0	0	0	0	0
HMT375	Peptoniphilus sp.	0	0	0.0949688	0	0	0	0	0	0	0	0	0	0	0	0	0	0	0	0	0	0	0	0	0	0	0	0	0	0	0	0	0	0	0	0	0	0	0	0	0	0	0	0	0	0	0	0	0
HMT376	Prevotella sp.	0	0	0	0	0	0	0	0	0	0	0	0	0	0	0	0	0	0	0	0	0	0	0	0	0	0	0	0	0	0	0	0	0	0	0	0	0	0	0	0	0	0	0	0	0	0	0	0
HMT378	Prevotella micans	0	0	0	0	0	0	0	0	0	0	0	0	0	0	0	0	0	0	0	0	0.0937873	0	0	0	0	0	0	0	0	0	0	0	0	0	0	0	0	0	0	0	0	0	0	0	0	0	0	0
HMT381	Ruminococcaceae [G-3] sp.	0	0	0	0	0	0	0	0	0	0	0	0	0	0	0	0	0	0	0	0	0	0	0	0	0	0	0	0	0	0	0	0	0	0	0	0	0	0	0	0	0	0	0	0	0	0	0	0
HMT382	Peptostreptococcaceae [XI][G-8] sp.	0	0	0	0	0	0	0	0	0	0	0	0	0	0	0	0	0	0	0	0	0	0	0	0	0	0	0	0	0	0	0	0	0	0	0	0	0	0	0	0	0	0	0	0	0	0	0	0
HMT383	Peptostreptococcaceae [XI][G-1] sp.	0	0	0	0	0	0	0	0	0	0	0	0	0	0	0	0	0	0	0	0	0	0	0	0	0	0	0	0	0	0	0	0	0	0	0	0	0	0	0	0	0	0	0	0	0	0	0	0
HMT386	Peptoniphilus sp.	0	0	0	0	0	0	0	0	0	0	0	0	0	0	0	0	0	0	0	0	0	0	0	0	0	0	0	0	0	0	0	0	0	0	0	0	0	0	0	0	0	0	0	0	0	0	0	0
HMT388	S elenomonas sp.	0	0	0	0	0	0	0	0	0	0	0	0	0	0	0	0	0	0	0	0	0	0	0	0	0	0	0	0	0	0	0	0	0	0	0	0	0	0	0	0	0	0	0	0	0	0	0	0
HMT389	Abiotrophia defectiva	0	0	0.126625	0.152817	0	0.152835	0	0.0521178	0	0	0	0	0	0	0	0	0.0624098	0	0.327962	0	0.140681	0	0.370412	0	0	0	0	0	0	0	0	0	0	0	0	0.48084	0	0	0	0	0	0	0	0.0589857	0	0.518594	0	0
HMT392	Leptotrichia sp.	0.0901926	0	0	0	0	0	0	0	0.0919077	0	0	0	0	0	0	0	0	0.0598632	0	0	0.112545	0	0	0	0	0	0	0	0	0	0	0	0.0950348	0	0.0631098	0	0	0	0	0	0	0	0	0	0	0	0	0
HMT396	Prevotella sp.	0	0	0	0	0	0	0	0	0	0	0	0	0	0	0	0	0	0	0	0	0	0	0	0	0	0	0.0832751	0	0.0506716	0	0	0	0	0	0	0	0	0	0	0	0	0	0	0	0	0	0	0
HMT402	Clostridiales [F-1][G-2] sp.	0	0	0	0	0	0	0	0	0	0	0	0	0	0	0	0	0	0	0	0	0	0	0	0	0	0	0	0	0	0	0	0	0	0	0	0	0	0	0	0	0	0	0	0	0	0	0	0
HMT414	Actinomyces sp.	0	0	0	0	0	0	0	0	0	0	0	0	0	0	0	0	0	0	0	0	0	0	0	0	0	0	0	0	0	0	0	0	0	0	0	0	0	0	0	0	0	0	0	0	0	0	0	0
HMT416	Atopobium sp.	0	0	0	0	0	0	0	0	0	0	0	0	0	0	0	0	0	0	0	0	0	0	0	0	0	0	0	0	0	0	0	0	0	0	0	0	0	0	0	0	0	0	0	0	0	0	0	0
HMT422	Bergeyella sp.	0	0	0	0	0	0	0	0	0	0	0	0	0	0	0	0	0	0	0	0	0	0	0	0	0	0	0	0	0	0	0	0	0	0	0	0	0	0	0	0	0	0	0	0	0	0	0	0
HMT435	Syntrophomonadaceae [VIII][G-1] sp.	0	0	0	0	0	0	0	0	0	0	0	0	0	0	0	0	0	0	0	0	0	0	0	0	0	0	0	0	0	0	0	0	0	0	0	0	0	0	0	0	0	0	0	0	0	0	0	0
HMT436	Bacteroidetes [G-3] sp.	0	0	0	0	0	0	0	0	0	0	0	0	0	0	0	0	0	0	0	0	0	0	0	0	0	0	0	0	0	0	0	0	0	0	0	0	0	0	0	0	0	0	0	0	0	0	0	0
HMT439	Anaerolineae [G-1] sp.	0	0	0	0	0	0	0	0	0	0	0	0	0	0	0	0	0	0	0	0	0	0	0	0	0	0	0	0	0	0	0	0	0	0	0	0	0	0	0	0	0	0	0	0	0	0	0	0
HMT443	Prevotella sp.	0	0	0	0	0	0	0	0	0	0	0	0	0	0	0	0	0	0	0	0	0	0	0	0	0	0	0	0	0	0	0	0	0	0	0	0	0	0	0	0	0	0	0	0	0	0	0	0
HMT448	Actinomyces sp.	0	0	0	0	0	0	0.126091	0	0	0	0.292722	0	0	0	0	0	0	0	0	0.24145	0	0	0	0	0.140997	0	0	0	0	0.384288	0	0	0	0	0	0	0	0	0	0	0	0	0.0710814	0	0	0	0	0
HMT451	Catonella sp.	0	0	0	0	0	0	0	0	0	0	0	0	0	0	0	0	0	0	0	0	0	0	0	0	0	0	0	0	0	0	0	0	0	0	0	0	0	0	0	0	0	0	0	0	0	0	0	0
HMT455	Butyrivibrio sp.	0	0	0	0	0	0	0	0	0	0	0	0	0	0	0	0	0	0	0	0	0	0	0	0	0	0	0	0	0	0	0	0	0	0	0	0	0	0	0	0	0	0	0	0	0	0	0	0
HMT459	Kingella sp.	0	0	0	0.152817	0	0	0	0	0	0	0	0	0	0	0.0708517	0	0	0	0	0	0	0	0	0	0	0	0	0.0504117	0	0	0	0	0.0527971	0.19769	0	0	0	0	0	0	0.154775	0	0	0	0	0	0	0.989921
HMT465	Bacteroides zoogleoformans	0	0	0	0	0	0	0	0	0	0	0	0	0	0	0	0	0	0	0	0	0	0	0	0	0	0	0	0	0	0	0	0	0	0	0	0	0	0	0	0	0	0	0	0	0	0	0	0
HMT466	Alloprevotella tannerae	0	0	0	0	0	0	0	0	0.0919077	0	0	0	0	0	0	0	0	0	0	0	0	0	0	0	0	0	0	0	0	0	0	0	0.110874	0	0	0	0	0	0.125117	0	0	0	0	0	0	0	0	0
HMT468	Bacillus subtilis	0	0	0	0	0	0	0	0	0	0	0	0	0	0	0	0	0	0	0	0	0	0	0	0	0	0	0	0	0	0	0	0	0	0	0	0	0	0	0	0	0	0	0	0	0	0	0	0
HMT473	Alloprevotella sp.	1.2176	0	0.15195	0	0	0.110041	0	0.687955	0	0	0	0	0	0.155358	0.0935242	0	0	0	0	0.0643866	0.0562724	0	0	0	0	0.594825	0.416375	0	0.506716	0	0.423357	0.106967	0.285104	0	0	0.380938	0	0	0.0834114	0	0	0	0	0.41637	0	0	0	0.212759
HMT475	Prevotella sp.	0	0	0	0	0	0	0	0	0	0	0	0	0	0	0	0	0	0	0	0	0	0	0	0	0	0	0	0	0	0	0	0	0	0	0	0	0	0	0	0	0	0	0.298542	0	0	0	0	0
HMT477	Pseudomonas stutzeri	0	0	0	0	0	0	0	0.0781768	0	0	0	0	0	0	0	0	0	0	0	0	0	0	0	0	0	0	0	0	0	0	0	0	0	0	0	0	0	0	0	0	0	0	0	0.0520462	0	0	0	0
HMT484	Erysipelothrix tonsillarum	0	0	1.03109	0	0	0	0.0720519	0.0893449	0.0656484	0	0	0	0	0	0	2.0239	0	0	0	0	0	0	0	0	0	0	0	0	0	0	0	0	0	0	0	0	0	0	0	0	0	0	0	0	0	0	0	0
HMT485	Agrobacterium tumefaciens	0	0	0	0	0	0	0	0	0	0	0	0	0	0	0	0	0	0	0	0	0	0	0	0	0	0	0	0	0	0	0	0	0	0	0	0	0	0	0	0	0	0	0	0	0	0	0	0
HMT488	TM7 [G-1] sp.	0	0	0	0	0	0	0	0	0	0	0	0	0	0	0	0	0	0	0	0	0	0	0	0	0	0	0	0	0	0	0	0	0	0	0	0	0	0	0	0	0	0	0	0	0	0	0	0
HMT490	Treponema sp.	0	0	0	0	0	0	0	0	0	0	0	0	0	0	0	0	0	0	0	0	0	0	0	0	0	0	0	0	0	0	0	0	0	0	0	0	0	0	0	0	0	0	0	0	0	0	0	0
HMT493	Peptostreptococcaceae [XI][G-5] sp.	0	0	0	0	0	0	0	0	0	0	0	0	0	0	0	0	0	0	0	0	0	0	0	0	0	0	0	0	0	0	0	0	0	0	0	0	0	0	0	0	0	0	0	0	0	0	0	0
HMT494	Lachnoanaerobaculum saburreum	0	0	0	0	0	0	0	0	0	0	0	0	0	0	0	0	0	0	0	0	0	0	0	0	0	0	0	0	0	0	0	0	0	0	0	0	0	0	0	0	0	0	0	0	0	0	0	0
HMT495	Peptostreptococcaceae [XI][G-3] sp.	0	0	0	0	0	0	0	0	0	0	0	0	0	0	0	0	0	0	0	0	0	0	0	0	0	0	0	0	0	0	0	0	0	0	0	0	0	0	0	0	0	0	0	0	0	0	0	0
HMT496	Lachnoanaerobaculum sp.	0	0	0	0	0	0	0	0	0	0	0	0	0	0	0	0	0	0	0	0	0	0	0	0	0	0	0	0	0	0	0	0	0	0	0	0	0	0	0	0	0	0	0	0	0	0	0	0
HMT498	Leptotrichia sp.	0.0541156	0	0	0	0	0	0	0	0	0	0	0	0	0	0	0	0	0	0	0	0	0	0	0	0	0	0	0	0	0	0	0	0	0	0	0	0	0	0	0	0	0	0	0	0	0	0	0
HMT500	Lachnospiraceae [G-8] sp.	0	0	0	0	0	0	0	0	0	0	0	0	0	0	0	0	0	0	0	0	0	0	0	0	0	0	0	0	0	0	0	0	0	0	0	0	0	0	0	0	0	0	0	0	0	0	0	0
HMT501	Selenomonas sp.	0	0	0	0	0	0	0	0	0	0	0	0	0	0	0	0	0	0	0	0	0	0	0	0	0	0	0	0	0	0	0	0	0	0	0	0	0	0	0	0	0	0	0	0	0	0	0	0
HMT503	Bacteroidetes [G-3] sp.	0	0	0	0	0	0	0	0	0	0	0	0	0	0	0	0	0	0	0	0	0	0	0	0	0	0	0	0	0	0	0	0	0	0	0	0	0	0	0	0	0	0	0	0	0	0	0	0
HMT504	Mollicutes [G-1] sp.	0	0	0	0	0	0	0	0	0	0	0	0	0	0	0	0	0	0	0	0	0	0	0	0	0	0	0	0	0	0	0	0	0	0	0	0	0	0	0	0	0	0	0	0	0	0	0	0
HMT505	Bacteroidetes [G-5] sp.	0	0	0	0	0	0	0	0	0	0	0	0	0	0	0	0	0	0	0	0	0.281362	0	0	0	0	0	0	0	0	0	0	0	0	0	0	0	0	0	0	0	0	0	0	0	0	0	0	0
HMT507	Bacteroidetes [G-5] sp.	0	0	0	0	0	0	0	0	0	0	0	0	0	0	0	0	0	0	0	0	0	0	0	0	0	0	0	0	0	0	0	0	0	0	0	0	0	0	0	0	0	0	0	0	0	0	0	0
HMT508	Treponema sp.	0	0	0	0	0	0	0	0	0	0	0	0	0	0	0	0	0	0	0	0	0	0	0	0	0	0	0	0	0	0	0	0	0	0	0	0	0	0	0	0	0	0	0	0	0	0	0	0
HMT509	Bacteroidetes [G-4] sp.	0	0	0	0	0	0	0	0	0	0	0	0	0	0	0	0	0	0	0	0	0	0	0	0	0	0	0	0	0	0	0	0	0	0	0	0	0	0	0	0	0	0	0	0	0	0	0	0
HMT511	Bacteroidetes [G-5] sp.	0	0	0	0	0	0	0	0	0	0	0	0	0	0	0	0	0	0	0	0	0.0803891	0	0	0	0	0	0	0	0	0	0	0	0	0	0	0	0	0	0	0	0	0	0	0	0	0	0	0
HMT515	Prevotella sp.	0	0	0	0	0	0	0	0	0	0	0	0	0	0	0	0	0	0	0	0	0	0	0	0	0	0	0	0	0	0	0	0	0	0	0	0	0	0	0	0	0	0	0	0	0	0	0	0
HMT516	Bacteroidetes [G-6] sp.	0	0	0	0	0	0	0	0	0	0	0	0	0	0	0	0	0	0	0	0	0	0	0	0	0	0	0	0	0	0	0	0	0	0	0	0	0	0	0	0	0	0	0	0	0	0	0	0
HMT518	Treponema sp.	0	0	0	0	0	0	0	0	0	0	0	0	0	0	0	0	0	0	0	0	0	0	0	0	0	0	0	0	0	0	0	0	0	0	0	0	0	0	0	0	0	0	0	0	0	0	0	0
HMT521	Mitsuokella sp.	0	0	0	0	0	0	0	0	0	0	0	0	0	0	0	0	0	0	0	0	0	0	0	0	0	0	0	0	0	0	0	0	0	0	0	0	0	0	0	0	0	0	0	0	0	0	0	0
HMT523	Neisseria sp.	0	0	0	0	0	0	0	0	0	0	0	0	0	0	0	0	0	0	0	0	0	0	0	0	0	0	0	0	0	0	0	0	0	0	0	0	0	0	0	0	0	0	0	0	0	0	0	0
HMT525	Actinomyces sp.	0	0	0	0	0	0	0.0579728	0	0	0	0	0	0	0	0	0	0	0	0	0	0	0	0	0.063145	0.0972393	0	0	0	0	0	0	0	0	0	0	0	0	0	0	0	0	0	0	0	0	0	0	0
HMT526	Prevotella sp.	0	0	0	0	0	0	0	0	0	0	0	0	0	0	0	0	0	0	0	0	0	0	0	0	0	0	0	0	0	0	0	0	0	0	0	0	0	0	0	0	0	0	0	0	0	0	0	0
HMT531	Aggregatibacter actinomycetemcomitans	0	0	0	0	0	0	0	0	0	0	0	0	0	0	0	0	0	0	0	0	0	0	0	0	0	0	0	0	0	0	0	0	0	0	0	0	0	0	0	0	0	0	0	0	0	0	0	0
HMT537	Streptococcus agalactiae	0	0	0	0	0	0	0.0720519	0	0	0	0	0	0	0	0	0	0	0	0	0	0	0	0	0	0	0	0	0	0	0	0	0	0	0	0	0	0	0	0	0	0	0	0	0	0	0	0	0
HMT538	Pseudoramibacter alactolyticus	0	0	0	0	0	0	0	0	0	0	0	0	0	0	0	0	0	0	0	0	0	0	0	0	0	0	0	0	0	0	0	0	0	0	0	0	0	0	0	0	0	0	0	0	0	0	0	0
HMT539	Filifactor alocis	0.112741	0	0.854719	0	0	0	0.0840605	0	0	0	0	0	0	0	0	2.19113	0	0	0	0	0	0	0	0	0	0	0	0	0	0	0	0	0	0	0	0	0	0	0	0	0	0	0	0	0	0	0	0
HMT540	Cardiobacterium valvarum	0	0	0	0	0	0.061134	0	0	0	0	0	0	0	0	0	0	0	0	0	0.0536555	0	0	0	0	0	0	0	0	0	0	0	0	0	0	0	0	0	0	0.208529	0	0	0	0	0	0.9836	0	0	0.0590997
HMT541	Treponema amylovorum	0	0	0	0	0	0	0	0	0	0	0	0	0	0	0	0	0	0	0	0	0	0	0	0	0	0	0	0	0	0	0	0	0	0	0	0	0	0	0	0	0	0	0	0	0	0	0	0
HMT544	Ochrobactrum anthropi	0	0	0	0	0	0	0.126091	0	0	0	0	0	0	0	0	0	0	0	0	0	0	0	0	0	0	0	0	0	0	0	0	0	0	0	0	0	0	0	0	0	0	0	0	0	0	0	0	0
HMT552	Propionibacterium avidum	0	0	0	0	0	0	0.112081	0	0	0	0	0	0	0	0	0	0	0	0	0	0	0	0	0	0	0	0	0	0	0	0	0	0	0	0	0	0	0	0	0	0	0	0	0	0	0	0	0
HMT553	Prevotella baroniae	0	0	0	0	0	0	0	0	0	0	0	0	0	0	0	0	0	0	0	0	0	0	0	0	0	0	0	0	0	0	0	0	0	0	0	0	0	0	0	0	0	0	0	0	0	0	0	0
HMT556	Prevotella bivia	0	0	0	0	0	0	0	0	0	0	0	0	0.158775	0	0	0	0	0	0	0	0	0	0	0	0	0	0	0	0	0	0	0	0	0	0	0	0	0	0	0	0	0	0	0	0	0	0	0
HMT557	Peptostreptococcaceae [XI][G-9] [Eubacterium] brachy	0	0	0	0	0	0	0	0	0	0	0	0	0	0	0	0	0	0	0	0	0	0	0	0	0	0	0	0	0	0	0	0	0	0	0	0	0	0	0	0	0	0	0	0	0	0	0	0
HMT559	Afipia broomeae	0	0	0	0	0	0	0	0	0	0	0	0	0	0	0.127533	0.0600308	0.0748917	0	0	0	0	0	0	0	0.140997	0	0	0	0	0	0	0	0	0	0	0	0	0	0.104264	0	0.116081	0	0	0.0624555	0	0	0	0
HMT560	Prevotella buccae	0	0	0	0	0	0	0	0	0	0	0	0	0	0	0	0	0	0	0	0	0	0	0	0	0	0	0	0	0	0	0	0	0	0	0	0	0	0	0	0	0	0	0	0	0	0	0	0
HMT562	Prevotella buccalis	0	0	0	0	0	0	0	0	0	0	0	0	0	0	0	0	0	0	0	0	0	0	0	0	0	0	0	0	0	0	0	0	0	0	0	0	0	0	0	0	0	0	0	0	0	0	0	0
HMT563	Leptotrichia buccalis	0	0	0	0	0	0	0	0	0	0	0	0	0	0	0	0	0	0	0	0	0.0562724	0	0	0	0	0	0	0	0	0	0	0	0	0	0	0	0	0	0	0	0	0	0	0	0	0	0	0
HMT569	Eggerthia catenaformis	0	0	0	0	0	0	0	0	0	0	0	0	0	0	0	0	0	0	0	0	0	0	0	0	0	0	0	0	0	0	0	0	0	0	0	0	0	0	0	0	0	0	0	0	0	0	0	0
HMT571	Burkholderia cepacia	0	0	0	0.0764087	0	0	0	0	0	0	0	0	0	0	0	0	0	0	0	0	0	0	0	0	0	0	0	0	0	0	0	0	0	0	0	0	0	0	0	0	0	0	0	0	0	0	0	0
HMT574	Escherichia coli	0	0	0.0542679	0	0	0	0	0	0	0	0	0.307454	0	0	0	0.360185	0	0	0	0	0	0	0.317496	0	0.0805697	0	0	0	0	0	0	0	0	0	0	0	0	0	0	0	0	0	0	0	0	0	0	0
HMT577	Eikenella corrodens	0.0676445	0.204172	0	0	0.0960369	0	0	0	0	0	0	0	0	0	0	0	0	0.149658	0	0	0.0703404	0	0	0.457801	0	0	0	0	0	0	0.0814148	0	0	0	0	0	0.127249	0.834638	0	0	0	0	0	0	0	0	0.155622	0
HMT579	Cryptobacterium curtum	0	0	0	0	0	0	0	0	0	0	0	0	0	0	0	0	0	0	0	0	0	0	0	0	0	0	0	0	0	0	0	0	0	0	0	0	0	0	0	0	0	0	0	0	0	0	0	0
HMT583	Prevotella dentalis	0	0	0	0	0	0	0	0	0	0	0	0	0	0	0	0	0	0	0	0	0	0	0	0	0	0	0	0	0	0	0	0	0	0	0	0	0	0	0	0	0	0	0	0	0	0	0	0
HMT590	Brevundimonas diminuta	0	0	0	0.229226	0	0.091701	0.420303	0	0	0.131059	0.0745111	0.358696	0.224153	0	0.595154	0.120062	0	0.0897948	0	0.0804833	0	0	0.277809	0	0	0.0743531	0.114503	0	0.0844527	0	0	0	0	0	0	0	0	0	0.573454	0	0.116081	0	0	0.239413	0	0.0852483	0	0
HMT591	Corynebacterium diphtheriae	0	0	0	0	0	0	0	0	0	0	0	0	0	0	0	0	0	0	0	0	0	0	0	0	0	0	0	0	0	0	0	0	0	0	0	0	0	0	0	0	0	0	0	0	0	0	0	0
HMT595	Corynebacterium durum	0	0	0	0.152817	0.128049	0.244536	0	0.104236	0	0	0	0	0	0	3.28752	0.120062	0	0.17959	0	0.0536555	0.0937873	0	0.740824	0	0.281994	1.78448	0.104094	0	0.157645	0	0.135691	0.0509367	0.475174	0.19769	0.0525915	0	0.0565552	0	0	0.350262	0	0.20982	0.388578	0.111032	0.218578	0	0	0
HMT596	Granulicatella elegans	0	0	0.126625	0	0	1.10041	0.0840605	0.156354	0	1.87851	0	0	1.26397	0	0	0.0600308	0.986075	0.329248	0.0607336	0.0804833	3.18877	0	0	0	0	0.272628	2.297	0	0.095713	0	0.434212	0	0.831554	0	0	2.96907	0	0	0.0521322	0	0	0.0524551	0	0.0867437	0	0	0.0979844	0.151443
HMT597	Bradyrhizobium elkanii	0	0	0	0	0	0	0	0	0	0	0	0	0	0	0	0	0	0	0	0	0	0	0	0	0	0	0	0	0	0	0	0	0	0	0	0	0	0	0.0521322	0	0	0	0	0	0	0	0	0
HMT598	Neisseria elongata	0.698993	0	0	0	0	0	0	0	0	0	0.0638666	0	0	0	0	0	0	0.104761	0	0	0	0.152006	0	0	0	0	0	0	0	0	0	0	0	0	0	0	0.848328	0	0	0	0	0	0	0	0.409833	0.101232	0	0
HMT600	Prevotella enoeca	0	0	0	0	0	0	0	0	0	0	0	0	0	0	0	0	0	0	0	0	0	0	0	0	0	0	0	0	0	0	0	0	0	0	0	0	0	0	0	0	0	0	0	0	0	0	0	0
HMT602	Slackia exigua	0	0	0	0	0	0	0	0	0	0	0	0	0	0	0	0	0	0	0	0	0	0	0	0	0	0	0	0	0	0	0	0	0	0	0	0	0	0	0	0	0	0	0	0	0	0	0	0
HMT603	Bulleidia extructa	0	0	0	0	0	0	0	0	0	0	0	0	0	0	0	0	0	0	0	0	0	0	0	0	0	0	0	0	0	0	0	0	0	0	0	0	0	0	0	0	0	0	0	0	0	0	0	0.0775684
HMT607	Mycoplasma fermentans	0	0	0	0	0	0	0	0	0	0	0	0	0	0	0	0	0	0	0	0	0	0	0	0	0	0	0	0	0	0	0	0	0	0	0	0	0	0	0	0	0	0	0	0	0	0	0	0
HMT608	Lactobacillus fermentum	0	0	0	0	0	0	0	0	0	0	0	0	0	0	0	0	0	0	0	0	0	0	0	0	0	0	0	0	0	0	0	0	0	0	0	0	0	0	0	0	0	0	0	0	0	0	0	0
HMT612	Pseudomonas fluorescens	0	0	0	0	0	0	1.00873	0	0	0	0	0	0	0	0.0541049	0	0	0	0	0	0	0	0	0	0.0512716	0	0	0	0	0	0	0	0	0	0	0	0	0	0	0	0	0	0	0	0	0	0	0
HMT613	Tannerella forsythia	2.77342	0	0	0	0	0	0	0	0	0	0	0	0	0	0	0	0	0	0	0	0	0	0	0	0	0	0	0	0	0	0	0	0	0	0	0	0	0	0	0	0	0	0	0	0	0	0	0
HMT614	Lysinibacillus fusiformis	0	0	0	0	0	0	0	0	0	0	0	0	0	0	0	0.0600308	0	0	0	0	0	0	0	0	0	0	0	0	0	0	0	0	0	0	0	0	0	0	0	0	0	0	0	0	0	0	0	0
HMT619	Porphyromonas gingivalis	2.09698	0	0	0	0	0	0	0	0	0	0	0	0	0	0	0	0	0	0	0	0	0	0	0	0	0	0	0	0	0	0	0	0	0	0	0	0	0	0	0	0	0	0	0	0	0	0	0
HMT623	Campylobacter gracilis	0.465995	0.0980027	0	0	1.15244	0	0	0	0.306359	0	0	0.478261	0	0	0.085022	0	0	0	0	1.77063	0	0	0	3.54033	0.93998	0	0	0	0	0.24018	1.38405	2.34309	0	0	0	0	0.226221	1.90469	0.104264	0	0	0	5.01835	0	0.109289	0	1.19887	0.339824
HMT627	Capnocytophaga haemolytica	0	0	0	0	0.0960369	0	0.0840605	0	0	0	0	0	0	0	0	0	0	1.06257	0	0	0	0	0	0	0	0	0	0.627626	0	0	0	2.9798	0	0	0	0	0	0	0	0.0656742	0	0	0.0924058	0	0	0	0	0
HMT630	Bacteroides heparinolyticus	0	0	0	0	0	0	0	0	0	0	0	0	0	0	0	0	0	0	0	0	0	0	0	0	0	0	0	0	0	0	0	0	0	0	0	0	0	0	0	0	0	0	0	0	0	0	0	0
HMT632	Mycoplasma hominis	0	0	0	0	0	0	0	0	0	0	0	0	0	0	0	0	0	0	0	0	0	0	0	0	0	0	0	0	0	0	0	0	0	0	0	0	0	0	0.104264	0	0	0	0	0	0	0	0	0
HMT633	Cardiobacterium hominis	0	0.174227	0	0	2.04879	0.061134	0.112081	0.104236	0.306359	0.0655296	0	0.239131	0	0	0	0	0	0.598632	0	0	0	0	0	0.0610401	0.563988	0	0	0.221812	0	0.0800601	0.0814148	0.101873	0.105594	0	0.0788873	0	0	0.235411	0	0	0	0	0	0.104092	3.27867	0.142081	0	0.184687
HMT635	Johnsonella ignava	0	0	0	0	0	0	0	0	0	0	0	0	0	0	0	0	0	0	0	0	0	0	0	0.885082	0	0	0	0	0	0	0	0	0	0	0	0	0	0.342416	0	0	0	0	0	0	0	0	0	0
HMT636	Bosea vestrisii	0	0	0	0	0	0	0.112081	0	0	0	0	0	0	0	0	0	0	0	0	0	0	0	0	0	0	0	0	0	0	0	0	0	0	0	0	0	0	0	0	0	0	0	0	0	0	0	0	0
HMT643	Prevotella intermedia	8.98544	0	0	0	0	0	0	0	0	0	0	0	0	0	0	0	0	0	0	0	0	0	0	0	0	0	0	0	0	0	0	0	0.0593967	0	0	0	0	0	0	0	0	0	0	0	0	0	0	0
HMT646	Kingella kingae	0	0	0	0	0	0	0	0	0	0	0	0	0	0	0	0	0	0	0	0	0	0	0	0	0	0	0	0	0	0	0	0	0	0	0	0	0	0	0	0	0	0	0	0	0	0	0	0
HMT652	Afipia sp. genosp. 4	0	0	0	0	0	0	0	0	0	0	0	0	0	0	0	0	0	0	0	0	0	0	0	0	0	0	0	0	0	0	0	0	0	0	0	0	0	0	0	0	0	0	0	0	0	0	0	0
HMT653	Treponema lecithinolyticum	0	0	0	0	0	0	0.126091	0	0	0	0	0	0	0	0	0	0	0	0	0	0.914426	0	0	0	0	0	0	0	0	0	0	0	0	0	0	0	0	0	0	0	0	0	0	0	0	0	0	0
HMT654	Eggerthella lenta	0	0	0	0.305635	0.256098	1.77289	2.01745	0.312707	0	0	0	0.119565	0.0996236	0	0.42511	0	17.1252	0.478906	0	0	0	0	0	0	1.78596	0.693963	1.71408	0.312553	1.43007	0.144108	0.135691	0.101873	0.818355	0.0988452	0.289253	0.662906	0.212082	0	5.49125	0.131348	2.59248	5.42036	0.0521264	0.381672	0	0	0	0
HMT655	Eubacterium limosum	0	0	0	0	0	0	0	0	0	0	0	0	0	0	0	0	0	0	0	0	0	0	0	0	0	0	0	0	0	0	0	0	0	0	0	0	0	0	0	0	0	0	0	0	0	0	0	0
HMT659	Mesorhizobium loti	0	0	0	0	0	0	0.252182	0	0	0	0	0	0	0	0	0	0	0	0	0	0	0	0	0	0	0	0	0	0	0	0	0	0	0	0	0	0	0	0	0	0	0	0	0	0	0	0	0
HMT660	Defluvibacter lusatiensis	0	0	0	0	0	0	0	0	0	0	0	0	0	0	0	0	0	0	0	0	0	0	0	0	0	0	0	0	0	0	0	0	0	0	0	0	0	0	0	0	0	0	0	0	0	0	0	0
HMT662	Finegoldia magna	0	0	0	0	0	0	0	0	0	0	0	0	0	0	0	0	0.0748917	0	0	0	0	0	0	0	0	0	0	0	0	0	0	0	0	0	0	0	0	0	0	0	0	0	0	0	0	0	0	0
HMT663	Stenotrophomonas maltophilia	0	0	0	0	0	0	1.00873	0	0	0	0	0	0	0	0.223183	0	0	0	0	0	0	0	0	0	0.281994	0	0	0	0	0	0	0	0	0	0	0	0	0	0.156396	0	0	0	0	0.0624555	0	0.0532802	0	0
HMT665	Prevotella marshii	0	0	0	0	0	0	0	0	0	0	0	0	0	0	0	0	0	0	0	0	0	0	0	0	0	0	0	0	0	0	0	0	0	0	0	0	0	0	0	0	0	0	0	0	0	0	0	0
HMT666	Corynebacterium matrucHMTii	0.112741	0	0	0.114613	1.34452	0	0	0	0	0	0.202244	0	0	0	0.0637665	0	0	0.239453	0	0.603624	0	0	0	0	7.26135	0	0	0	0	0.24018	0	0	0	0	0.177496	0	0.583226	0	0	0	0	0	0	0.21339	0.0819666	0	0	0.687035
HMT673	Peptostreptococcaceae [XI][G-6] [Eubacterium] minutum	0	0	0	0	0	0	0	0	0	0	0	0	0	0	0	0	0	0	0	0	0	0	0	0	0	0	0	0	0	0	0	0	0	0	0	0	0	0	0	0	0	0	0	0	0	0	0	0
HMT674	Atopobium minutum	0	0	0	0	0	0	0	0	0	0	0	0	0	0	0	0	0	0	0	0	0	0	0	0	0	0	0	0	0	0	0	0	0	0	0	0	0	0	0	0	0	0	0	0	0	0	0	0
HMT676	Proteus mirabilis	0	0	0	0	0	0	0	0	0	0	0	0	0	0	0	0	0	0	0	0	0	0	0	0	0	0	0	0	0	0	0	0	0	0	0	0	0	0	0	0	0	0	0	0	0	0	0	0
HMT678	Solobacterium moorei	0	0	0	0	0	0	0	0	0	0	0	0	0	0	0	0	0	0	0	0	0	0	0	0	0	0	0	0	0	0	0	0	0	0	0	0	0	0	0	0	0	0	0	0	0	0	0	0
HMT681	Rothia mucilaginosa	0	0	0	0	0	0	0.0560404	0	0	0	0	0	0	0.339846	0.212555	0	0	0.099772	0	0	0	0	0	0	0	0.148706	0.0832751	0.0604941	0.32655	0	0	0	0.158391	0	0.157775	0.102704	0	0	0	0	0	0.349701	0	0	0	0	0	0
HMT683	Simonsiella muelleri	0	0	0	0	0	0	0	0	0	0	0	0	0.354909	0.0728241	0	0	0	0	0	0	0	0	0	0	0	0	0	0	0	0	0	0	0	0	0	0	0	0	0	0	0	0	0	0	0	0	0	0
HMT684	Mitsuokella multacida	0	0	0	0	0	0	0	0	0	0	0	0	0	0	0	0	0	0	0	0	0	0	0	0	0	0	0	0	0	0	0	0	0	0	0	0	0	0	0	0	0	0	0	0	0	0	0	0
HMT685	Prevotella multiformis	0	0	0	0	0	0	0	0	0	0	0	0	0	0	0	0	0	0	0	0	0	0	0	0	0	0	0	0	0	0	0	0	0	0	0	0	0	0	0.0781982	0	0	0	0	0	0	0	0	0
HMT686	Streptococcus mutans	0	0	0	0	0.307318	0	0	0	0	0	0	1.36304	0	0	0	0	0	0	0	0	0	0	0.111124	0	0	0	0	0	0	0	0	0	0	0	0	0	0.118766	0	0	0	0	0	1.13162	0	0	0	0	0
HMT693	Prevotella nigrescens	0.811733	0	0	0	0	0	0	0	0	0	0	0	0	0	0	0	0	0	0	0	0	0	0	0	0	0	0	0	0	0	0	0.229215	0	0	0	0	0	0	0	0	0	0	0.159933	0	0	0	0	0
HMT694	Peptostreptococcaceae [XI][G-6] [Eubacterium] nodatum	0	0	0	0	0	0	0	0	0	0	0	0	0	0	0	0	0	0	0	0	0	0	0	0	0	0	0	0	0	0	0	0	0	0	0	0	0	0	0	0	0	0	0	0	0	0	0	0
HMT700	Capnocytophaga ochracea	0	0.0571683	0.664781	0	0.0960369	0	0	0	0	0	0	0	0	0	0	1.41072	0	0	0	0	0	0	0	0	0	0	0	0	0	0	0	0	0	0	0	0	0.0530205	0	0	0	0	0	0	0.0728647	0	0	0	0
HMT703	Desulfomicrobium orale	0	0	0	0	0	0	0.336242	0	0	0	0	0	0	0	0.488877	0	0	0	0	0.0804833	0	0	0	0	0	0	0	0	0	0	0	0	0	0	0	0	0	0	0	0	0	0	0	0	0	0	0	0
HMT704	Mycoplasma orale	0	0	0	0	0	0	0	0	0	0	0	0	0	0	0	0	0	0	0	0	0	0	0	0	0	0	0	0	0	0	0	0	0	0	0	0	0	0	0	0	0	0	0	0	0	0	0	0
HMT705	Prevotella oralis	0.0751605	0	0	0	0	0	0	0	0	0	0	0	0	0	0	0	0	0	0	0	0	0	0	0.0610401	0	0	0	0	0	0	0	0	0	0	0	0	0	0	0	0	0	0	0	0	0	0	0	0
HMT706	Kingella oralis	0.0676445	1.83755	0	0	7.97106	0	0.210151	0.0781768	1.4935	0	1.93197	0	0.0560383	0.0606867	0.658921	0.0600308	0.112338	0.389111	0	0.563383	0.0703404	0.304013	0.416713	0	1.48047	0.11153	0	4.3102	0	1.52514	0	0.15281	0.0593967	0.741339	0	1.58257	2.01478	0	0.156396	0.295534	0.0870609	0	0	0.140525	0.163933	0.0639362	0	0.132974
HMT711	Moraxella osloensis	0	0	0	0	0	0	0	0	0	0	0	0	0	0	0	0	0	0	0	0	0	0	0	0	0	0	0	0	0	0	0	0	0	0	0	0	0	0	0	0	0.20188	0	0	0.0543091	0	0	0	0.0867225
HMT714	Prevotella pallens	0	0	0	0	0	0	0	0.469061	0	0.0600688	0	0	0	3.39846	0	0	0.205952	0	0	0	0	0	0	0	0	0	0.364328	0	0.447599	0	0	0	0.158391	0	0.157775	0	0	0	0	0	0	0.0524551	0	0.176957	0	0	0	0
HMT717	Variovorax paradoxus	0	0	0	0.458452	0	0	7.31327	0	0	0.054608	0	0.179348	0.0747177	0	0.340088	0	0.0748917	0	0	0.24145	0.140681	0	0	0	0.140997	0	0	0	0.0506716	0	0	0	0.0791957	0	0	0	0	0	0.834114	0	0	0	0	0.0520462	0	0	0	0
HMT718	Haemophilus parainfluenzae	0.691477	3.31576	12.5359	30.2579	0.0640246	1.86459	0.280202	13.7591	2.52746	1.61276	2.02244	1.31522	12.0233	24.2585	0.573899	3.00154	3.807	1.75599	5.76969	1.15359	2.67294	6.13093	0.833427	0.701962	0	18.0926	6.13807	1.44682	10.3426	1.38504	4.3964	0.191013	5.05532	2.27344	7.67836	7.51138	1.25835	0.128406	3.18006	22.7014	9.67343	6.15473	9.39933	3.60507	0.218578	4.96571	1.59657	0.605772
HMT723	Atopobium parvulum	0	0	0	0	0	0	0	0	0	0	0	0	0	0	0	0	0	0	0	0	0	0	0	0	0	0	0	0	0	0	0	0	0	0	0	0	0	0	0	0	0.116081	0	0	0	0	0	0	0
HMT724	Treponema parvum	0	0	0	0	0	0	0	0	0	0	0	0	0	0	0	0	0	0	0	0	0	0	0	0	0	0	0	0	0	0	0	0	0	0	0	0	0	0	0	0	0	0	0	0	0	0	0	0
HMT725	Treponema pectinovorum	0	0	0	0	0	0	0	0	0	0	0	0	0	0	0	0	0	0	0	0	0	0	0	0	0	0	0	0	0	0	0	0	0	0	0	0	0	0	0	0	0	0	0	0	0	0	0	0
HMT733	Chlamydophila pneumoniae	0	0	0	0	0	0	0	0	0	0	0.0638666	0	0.0747177	0	0	0	0	0	0	0	0	0	0	0	0	0	0	0	0	0	0	0	0	0	0	0	0	0	0	0	0	0	0	0	0	0	0	0
HMT736	Dialister pneumosintes	0	0	0	0	0	0	0	0	0	0	0	0	0	0	0	0	0	0	0	0	0	0	0	0	0	0	0	0	0	0	0	0	0	0	0	0	0	0	0	0	0	0	0	0	0	0	0	0
HMT740	Pseudomonas pseudoalcaligenes	0	0	0	0.114613	0	0	0.126091	0	0	0	0	0	0	0	0	0	0	0	0	0	0	0	0.138904	0	0.0704985	0	0	0	0	0	0	0	0	0.148268	0	0	0	0	0.0521322	0	0.116081	0	0	0.265436	0	0	0	0
HMT745	Streptococcus pyogenes	0	0	0	0	0	0	0	0	0	0	0	0	0	0	0	0	0	0	0	0	0	0	0	0	0	0	0	0	0	0	0	0	0	0	0	0	0	0	0	0	0	0	0	0	0	0	0	0
HMT746	Actinomyces radicidentis	0	0	0	0	0	0	0	0	0	0	0	0	0	0	0	0	0	0	0	0	0	0	0	0	0	0	0	0	0	0	0	0	0	0	0	0	0	0	0	0	0	0	0	0	0	0	0	0
HMT750	Atopobium rimae	0	0	0	0	0	0	0	0	0	0	0	0	0	0	0	0	0	0	0	0	0	0	0	0	0	0	0	0	0	0	0	0	0	0	0	0	0	0	0.104264	0	0	0	0	0	0	0	0	0
HMT753	Cronobacter sakazakii	0	0	0	0	0	0	0	0	0	0	0	0	0	0	0	0	0	0	0	0	0	0	0	0	0	0	0	0	0	0	0	0	0	0	0	0	0	0	0	0	0	0	0	0	0	0	0	0
HMT754	Mycoplasma salivarium	0	0	0	0	0	0	0	0	0	0	0	0	0	0	0	0	0	0	0	0	0	0	0	0	0	0	0	0	0	0	0	0.0764051	0	0	0	0	0	0	0	0	0	0	0	0	0	0	0	0
HMT756	Lactobacillus salivarius	0	0	0	0	0	0	0	0	0	0	0	0	0	0	0	0	0	0	0	0	0	0	0	0	0	0	0	0	0	0	0	0	0	0	0	0	0	0	0	0	0	0	0	0	0	0	0	0
HMT759	Peptostreptococcaceae [XI][G-5] [Eubacterium] saphenum	0	0	0	0	0	0	0	0	0	0	0	0	0	0	0	0	0	0	0	0	0	0	0	0	0	0	0	0	0	0	0	0	0	0	0	0	0	0	0	0	0	0	0	0	0	0	0	0
HMT775	Capnocytophaga sputigena	0.3044	1.98456	0	0.687678	4.99392	0	0.210151	0	0.459539	0.857345	6.36538	0	0.252172	0	0	0.210108	0	4.53464	0.892784	0	0.281362	2.3561	0.416713	0.228901	0	0	0.515264	3.0852	0.126679	1.28496	0.71238	0	0	0.296536	0.157775	0.196071	17.1044	3.90033	0	0.0656742	0.0870609	0	0	0	27.7867	1.84349	0	2.43232
HMT776	Campylobacter sputorum	0	0	0	0	0	0	0	0	0	0	0	0	0	0	0	0	0	0	0	0	0	0	0	0	0	0	0	0	0	0	0	0	0	0	0	0	0	0	0	0	0	0	0	0	0	0	0	0
HMT777	Jonquetella anthropi	0	0	0	0	0	0	0	0	0	0	0	0	0	0	0	0	0	0	0	0	0	0	0	0	0	0	0	0	0	0	0	0	0	0	0	0	0	0	0	0	0	0	0	0	0	0	0	0
HMT780	Veillonella sp.	0	0	0	0	0	0	0	0.390884	0	0.147442	0	0	0.0933972	0	0	0	0	0	0	0.160967	0	0	0	0	0	0	0	0	0	0	0	0	0.91075	0	0	0.0630228	0.0742287	0	0.338859	0	0	0	0	0	0	0	0	0.249327
HMT781	Prevotella saccharolytica	0.120257	0	0	0	0	0	0	0	0	0	0	0	0	0	0	0	0	0	0	0	0	0	0	0	0	0	0	0	0	0	0	0	0	0	0	0	0	0	0	0	0	0	0	0	0.109289	0	0	0.716584
HMT782	Prevotella fusca	1.24015	0	0	0	0	0	0	0	0	0	0	0	0	0	0	0	0	0	0	0	0	0	0	0	0	0	0	0	0	0	0	0	0	0	0	0	0	0	0	0	0	0	0	0	0	0	0	0
HMT786	Paenibacillus phoenicis	0	0	0	0	0	0	0	0	0	0	0	0	0	0	0	0	0	0	0	0	0	0	0	0	0	0	0	0	0	0	0	0	0	0	0	0	0	0	0	0	0	0	0	0	0	0	0	0
HMT787	Bacteroides pyogenes	0	0	0	0	0	0	0	0	0	0	0	0	0	0	0	0	0	0	0	0	0	0	0	0	0	0	0	0	0	0	0	0	0	0	0	0	0	0	0	0	0	0	0	0	0	0	0	0
HMT790	Peptoniphilaceae [G-2] sp.	0	0	0	0	0	0	0	0	0	0	0	0	0	0	0	0.360185	0	0	0	0	0	0	0	0	0	0	0	0	0	0	0	0	0	0	0	0	0	0	0	0	0	0	0	0	0	0	0	0
HMT794	Prevotella multisaccharivorax	0	0	0	0	0	0	0	0	0	0	0	0	0	0	0	0	0	0	0	0	0	0	0	0	0.0563988	0	0	0	0	0	0	0	0	0	0	0	0	0	0	0	0	0	0	0	0	0	0	0
HMT795	Prevotella shahii	0	0	0	0	0	0	0	0	0	0	0	0	0	0	0	0	0	0	0	0	0	0	0	0	0	0	0	0	0.416633	0	0	0	0.0527971	0	0	0	0	0	0	0	0	0	0	0.055516	0	0	0	0
HMT804	Lactococcus lactis	0	0	0	0	0	0	0	0	0.0765898	0	0	0	0	0	0	0	0	0	0	0	0	0	0	0	0	0	0	0	0	0	0	0	0	0	0	0	0	0	0	0	0	0	0	0.0589857	0	0	0	0
HMT805	Treponema pallidum	0	0	0	0	0	0	0	0.130295	0	0	0	0	0	0	0	0	0	0	0	0	0	0	0	0	0	0	0	0	0	0	0	0	0	0	0	0	0	0	0	0	0	0	0	0	0	0	0	0
HMT806	Olsenella profusa	0	0	0	0	0	0	0	0	0	0	0	0	0	0	0	0	0	0	0	0	0	0	0	0	0	0	0	0	0	0	0	0	0	0	0	0	0	0	0	0	0	0	0	0	0	0	0	0
HMT807	Olsenella sp.	0	0	0	0	0	0	0	0	0	0	0	0	0	0	0	0	0	0	0	0	0	0	0	0	0	0	0	0	0	0	0	0	0	0	0	0	0	0	0	0	0	0	0	0	0	0	0	0
HMT809	Olsenella sp.	0	0	0	0	0	0	0	0	0	0	0	0	0	0	0	0	0	0	0	0	0	0	0	0	0	0	0	0	0	0	0	0	0	0	0	0	0	0	0	0	0	0	0	0	0	0	0	0
HMT810	Atopobium sp.	0	0	0	0	0	0	0	0	0	0	0	0	0	0	0	0	0	0	0	0	0	0	0	0	0	0	0	0	0	0	0	0	0	0	0	0	0	0	0	0	0	0	0	0	0	0	0	0
HMT811	Arcanobacterium haemolyticum	0	0	0	0	0	0	0	0	0	0	0	0	0	0	0	0	0	0	0	0	0	0	0	0	0	0	0	0	0	0	0	0	0	0	0	0	0	0	0	0	0	0	0	0	0	0	0	0
HMT812	Helicobacter pylori	0	0	0	0	0	0	0	0	0	0	0	0	0	0	0	0	0	0	0	0	0	0	0	0	0	0	0	0	0	0	0	0	0	0	0	0	0	0	0	0	0	0	0	0	0	0	0	0
HMT813	Dolosigranulum pigrum	0	0	0	0	0	0	0	0	0	0	0	0	0	0	0	0	0	0	0	0	0	0	0	0	0	0	0	0	0	0	0	0	0	0	0	0	0	0	0	0	0	0	0	0	0	0	0	0
HMT814	Atopobium vaginae	0	0	0	0	0	0	0	0	0	0	0	0	0	0	0	0	0	0	0	0	0	0	0	0	0	0	0	0	0	0	0	0	0	0	0	0	0	0	0	0	0	0	0	0	0	0	0	0
HMT816	Lactobacillus coleohominis	0	0	0	0	0	0	0	0	0	0	0	0	0	0	0	0	0	0	0	0	0	0	0	0	0	0	0	0	0	0	0	0	0	0	0	0	0	0	0	0	0	0	0	0	0	0	0	0
HMT820	Prevotella sp.	0	0	0	0	0	0	0	0	0	0	0	0	0	0	0	0	0	0	0	0	0	0	0	0	0	0	0	0	0	0	0	0	0	0	0	0	0	0	0	0	0	0	0	0	0	0	0	0
HMT821	Haemophilus ducreyi	0	0	0	0	0	0	0	0	0	0	0	0	0	0	0	0	0	0	0	0	0	0	0	0	0	0	0	0	0	0	0	0	0	0	0	0	0	0	0	0	0	0	0	0	0	0	0	0
HMT824	Bacillus anthracis	0	0.054446	1.47729	0	0	0	0.108967	0	0	0	0	0	0	0	0	2.66804	0	0	0	0	0	0	0	0	0	0	0	0	0	0	0	0	0	0	0	0	0	0	0	0	0	0	0	0	0	0	0	0
HMT825	Listeria monocytogenes	0	0	0.257542	0	0	0	0	0.0530012	0	0	0	0	0	0	0	0.284892	0	0	0	0	0	0	0.0941725	0	0	0	0	0	0	0	0	0	0	0	0	0	0	0	0	0	0	0.0711256	0	0	0	0	0	0
HMT827	Yersinia pestis	0	0	0	0	0	0	0	0	0	0	0	0	0	0	0	0	0	0	0	0	0	0	0	0	0	0	0	0	0	0	0	0	0	0	0	0	0	0	0	0	0	0	0	0	0	0	0	0
HMT829	Gardnerella vaginalis	0	0	0	0	0	0	0	0	0	0	0	0	0	0	0	0	0	0	0	0	0	0	0	0	0	0	0	0	0	0	0	0	0	0	0	0	0	0	0	0	0	0	0	0	0	0	0	0
HMT830	Mobiluncus mulieris	0	0	0	0	0	0	0	0	0	0	0	0	0	0	0	0	0	0	0	0	0	0	0	0	0	0	0	0	0	0	0	0	0	0	0	0	0	0	0	0	0	0	0	0	0	0	0	0
HMT831	Alloiococcus otitis	0	0	0	0	0	0	0	0	0	0	0	0	0	0	0	0	0	0	0	0	0	0	0	0	0	0	0	0	0	0	0	0	0	0	0	0	0	0	0	0	0	0	0	0	0	0	0	0
HMT832	Turicella otitidis	0	0	0	0	0	0	0	0	0	0	0	0	0	0	0	0	0	0	0	0	0	0	0	0	0	0	0	0	0	0	0	0	0	0	0	0	0	0	0	0	0	0	0	0	0	0	0	0
HMT833	Moraxella catarrhalis	0	0	0	0	0	0	0	0	0	0	0	0	0	0	0	0	0	0	0	0	0	0	0	0	0	0	0	0	0	0	0	0	0	0	0	0	0	0	0.0781982	0	0	0	0	0	0	0	0	0
HMT836	Peptoniphilus lacrimalis	0	0	0	0	0	0	0	0	0	0	0	0	0	0	0	0	0	0	0	0	0	0	0	0	0	0	0	0	0	0	0	0	0	0	0	0	0	0	0	0	0	0	0	0	0	0	0	0
HMT837	Sneathia sanguinegens	0	0	0	0	0	0	0	0	0	0	0	0	0	0	0.0510132	0	0	0	0	0	0	0	0	0	0	0	0	0	0	0	0	0	0	0	0	0	0	0	0	0	0	0	0	0	0	0	0	0
HMT838	Lactobacillus iners	0	0	0	0	0	0	0	0	0	0	0	0	0	0	0	0	0	0	0	0	0	0	0	0	0	0	0	0	0	0	0	0	0	0	0	0	0	0	0	0	0	0	0	0	0	0	0	0
HMT839	Lactobacillus jensenii	0	0	0	0	0	0	0	0	0	0	0	0	0	0	0	0	0	0	0	0	0	0	0	0	0	0	0	0	0	0	0	0	0	0	0	0	0	0	0	0	0	0	0	0	0	0	0	0
HMT840	Peptoniphilus indolicus	0	0	0	0	0	0	0	0	0	0	0	0	0	0	0.0531388	0	0	0	0	0	0	0	0	0	0	0	0	0	0	0	0	0	0	0	0	0	0	0	0	0	0	0	0	0	0	0	0	0
HMT841	Megasphaera sp.	0	0	0	0	0	0	0	0	0	0	0	0	0	0	0	0	0	0	0	0	0	0	0	0	0	0	0	0	0	0	0	0	0	0	0	0	0	0	0	0	0	0	0	0	0	0	0	0
HMT842	Campylobacter ureolyticus	0	0	0	0	0	0	0	0	0	0	0	0	0	0	0	0	0	0	0	0	0	0	0	0	0	0	0	0	0	0	0	0	0	0	0	0	0	0	0	0	0	0	0	0	0	0	0	0
HMT843	Dialister micraerophilus	0	0	0	0	0	0	0	0	0	0	0	0	0	0	0	0	0	0	0	0	0	0	0	0	0	0	0	0	0	0	0	0	0	0	0	0	0	0	0	0	0	0	0	0	0	0	0	0
HMT844	Sneathia amnii [NVP]	0	0	0	0	0	0	0	0	0	0	0	0	0	0	0	0	0	0	0	0	0	0	0	0	0	0	0	0	0	0	0	0	0	0	0	0	0	0	0	0	0	0	0	0	0	0	0	0
HMT845	Leptotrichia goodfellowii	0	0	0	0	0	0.0733608	0	0	0.275723	0	0	0	0	0	0	0	0	0.155644	0	0.128773	0	0	0	0	0.112798	0	0	0	0	0	1.35149	0.122248	0	0	0	0	0	3.68525	0	0	0	0	0	0.174875	0	0	0	0
HMT847	Leptotrichia sp.	0	0	0	0	0	0	0	0	0	0	0	0	0	0	0	0	0	0	0	0	0	0	0	0	0	0	0	0	0	0	0	0	0	0	0	0	0	0	0	0	0	0	0	0	0	0	0	0
HMT848	Actinobaculum sp.	0	0	0	0	0	0	0	0	0	0	0	0	0	0	0	0	0	0	0	0	0	0	0	0	0	0	0	0	0	0	0	0	0	0	0	0	0	0	0	0	0	0	0	0	0	0	0	0
HMT853	Corynebacterium urealyticum	0	0	0	0	0	0	0.0560404	0	0	0	0	0	0	0	0	0	0	0	0	0	0	0	0	0	0	0	0	0	0	0	0	0	0	0	0	0	0	0	0	0	0	0	0	0	0	0	0	0
HMT855	Kytococcus sedentarius	0	0	0	0	0	0	0	0	0	0	0	0	0	0	0	0	0	0	0	0	0	0	0	0	0	0	0	0	0	0	0	0	0	0	0	0	0	0	0	0	0	0	0	0	0	0	0	0
HMT856	Sanguibacter keddieii	0	0	0.0949688	0	0	0	0.126091	0	0	0	0	0	0	0	0	0.120062	0	0	0	0	0	0	0	0	0	0	0	0	0	0	0	0	0	0	0	0	0	0	0	0	0	0	0	0	0	0	0	0
HMT857	Rhodobacter capsulatus	0	0.0980027	4.93838	0	0.0960369	0	0.252182	0.0781768	0.114885	0	0	0	0	0	0	8.01412	0.599134	0	0	0	0	0	0	0	0	0	0	0	0	0	0	0	0	0	0	0	0	0	0.104264	0	0	0	0	0	0	0	0	0
HMT858	Comamonas testosteroni	0	0	0	0	0	0	0.392282	0	0	0	0	0	0	0	0.297577	0.160082	0	0	0.0728803	0	0.0937873	0	0	0	0.093998	0	0	0	0	0	0	0	0	0	0	0	0	0	0	0	0	0	0	0	0	0	0	0
HMT859	Anaerococcus lactolyticus	0	0	0	0	0	0	0	0	0	0	0	0	0	0	0	0	0	0	0	0	0	0	0	0	0	0	0	0	0	0	0	0	0	0	0	0	0	0	0	0	0	0	0	0	0	0	0	0
HMT866	Actinomyces graevenitzii	0	0	0	0	0	0	0	0	0	0	0	0	0	0	0	0	0	0	0	0	0	0	0	0	0	0	0	0	0	0	0	0	0.118793	0	0.315549	0	0	0	0.364925	0	0	0.10491	0	0	0	0	0	0
HMT870	TM7 [G-6] sp.	0	0	0	0	0	0	0	0	0	0	0	0	0	0	0.085022	0.120062	0	0	0	0	0	0	0	0	0	0	0	0	0	0	0	0	0.0791957	0	0.0788873	0	0	0	0	0	0	0	0	0	0	0	0	0
HMT871	GN02 [G-1] sp.	0	0	0	0	0.192074	0	0	0	0	0	0	0	0	0	0	0	0	0	0	0	0	0	0	0	0	0	0	0	0	3.41056	0	0	0	0	0	0	0	0	0	0	0	0	0	0	0	0	0	0
HMT872	GN02 [G-1] sp.	0	0	0	0	0	0	0	0	0	0	0	0	0	0	0	0	0	0	0	0	0	0	0	0	0	0	0	0	0	0	0	0	0	0	0	0	0	0	0	0	0	0	0	0	0.0655733	0	0	0
HMT873	GN02 [G-2] sp.	0	0	0	0	0	0	0	0	0	0	0	0	0	0	0	0	0	0	0	0	0	0	0	0	0	0	0	0	0	0	0	0	0.0527971	0	0	0	0	0	0	0	0	0	0	0	0	0	0	0
HMT874	SR1 [G-1] sp.	0	0	0	0	0	0	0	0	0	0	0	0	0	0	0	0	0	0.119726	0	0	0	0	0	0	0	0	0	0	0	0	0	0	0	0	0	0	0	0	0	0	0	0	0	0	0	0.0639362	0	0
HMT875	SR1 [G-1] sp.	0	0	0	0	0	0	0	0	0	0.0655296	0	0	0	0	0	0	0	0	0	0	0	0	0	0	0	0	0	0	0	0	0	0	0	0	0	0	0	0	0	0	0	0	0	0.104092	0	0	0	0
HMT876	Clostridiales [F-3][G-1] sp.	0	0	0	0	0	0	0.0934006	0	0	0	0	0	0	0	0	0.0667009	0	0	0	0	0	0	0	0	0	0	0	0	0	0	0	0	0	0	0	0	0	0	0	0	0	0	0	0	0	0	0	0
HMT878	Capnocytophaga sp.	0	0	0	0	0	0	0	0	0	0	0	0	0	0	0	0	0	0	0	0	0	0	0	0	0	0	0	0	0	0	0	0	0	0	0	0	0	0	0	0	0	0	0	0	0	0	0	0
HMT888	Actinomyces dentalis	0	0	0	0	0	0	0	0	0	0	0	0	0	0	0	0	0	0	0	0	0	0	0	0	0	0	0	0	0	0	0	0	0	0	0	0	0	0	0	0	0	0	0	0	0	0	0	0
HMT894	Ottowia sp.	0	0	0	0	0	0	0	0	0	0	0	0	0	0	0	0	0	0	0	0	0.281362	0	0	0.18312	0	0	0	0.453705	0	0	0	0	0	0	0	0	0	0	0	0	0	0	0	0	0	0	0	0.0664872
HMT896	Actinomyces sp.	0	0	0	0	0	0	0	0	0	0	0	0	0	0	0	0	0	0	0	0	0	0	0	0	0	0	0	0	0	0	0	0	0	0	0	0	0	0	0	0	0	0	0	0	0	0	0	0
HMT897	Actinomyces sp.	0	0	0	0	0	0	0	0	0	0	0	0	0	0	0	0	0	0	0	0	0	0	0	0.0610401	0	0	0	0	0	0	0	0	0	0	0	0	0	0	0	0	0	0	0	0	0	0	0	0
HMT899	Bacteroidetes [G-3] sp.	0	0	0	0	0	0	0	0	0	0	0	0	0	0	0	0	0	0	0	0	0	0	0	0	0	0	0	0	0	0	0	0	0	0	0	0	0	0	0	0	0	0	0	0	0	0	0	0
HMT901	Capnocytophaga sp.	0	0	0	0	0	0	0	0	0	0	0	0	0	0	0	0	0	0	0	0	0	0	0	0	0	0	0	0	0	0	0	0	0	0	0	0	0	0	0	0	0	0	0	0	0	0	0	0
HMT904	Erysipelotrichaceae [G-1] sp.	0	0	0	0	0	0	0	0	0	0	0	0	0	0	0	0	0	0	0	0	0	0	0	0	0	0	0	0	0	0	0	0	0	0	0	0	0	0	0	0	0	0	0	0	0	0	0	0
HMT905	Erysipelotrichaceae [G-1] sp.	0	0	0	0	0	0	0	0	0	0	0	0	0	0	0	0	0	0	0	0	0	0	0	0	0	0	0	0	0	0	0	0	0	0	0	0	0	0	0	0	0	0	0	0	0	0	0	0
HMT906	Mollicutes [G-2] sp.	0	0	0	0	0	0	0	0	0	0	0	0	0	0	0	0	0	0	0	0	0	0	0	0	0	0	0	0	0	0	0	0	0	0	0	0	0	0	0	0	0	0	0	0	0	0	0	0
HMT911	Bacteroidetes [G-7] sp.	0	0	0	0	0	0	0	0	0	0	0	0	0	0	0	0	0	0	0	0	0	0	0	0	0	0	0	0	0	0	0	0	0	0	0	0	0	0	0	0	0	0	0	0	0	0	0	0
HMT915	Propionibacterium sp.	0	0	0	0	0	0	0	0	0	0	0	0	0	0	0	0	0	0	0	0	0	0	0	0	0	0	0	0	0	0	0	0	0	0	0	0	0	0	0	0	0	0	0	0	0	0	0	0
HMT917	Veillonella sp.	0	0	0	0	0	0	0	0	0	0	0	0	0	0	0	0	0	0	0	0	0	0	0	0	0	0	0	0	0	0	0	0	0	0	0	0	0	0	0	0	0	0.10491	0	0	0	0	0	0
HMT921	Paenibacillus glucanolyticus	0	0	0	0	0	0	0	0	0	0	0	0	0	0	0	0	0	0	0	0	0	0	0	0	0	0	0	0	0	0	0	0	0	0	0	0	0	0	0	0	0	0	0	0	0	0	0	0
HMT927	Treponema sp.	0.169111	0	0	0	0	0	0	0	0	0	0	0	0	0	0	0	0	0	0	0	0	0	0	0	0	0	0	0	0	0	0	0	0	0	0	0	0	0	0	0	0	0	0	0	0	0	0	0
HMT929	Peptoniphilaceae [G-3] sp.	0	0	0	0	0	0	0	0	0	0	0	0	0	0	0	0	0	0	0	0	0	0	0	0	0	0	0	0	0	0	0	0	0	0	0	0	0	0	0	0	0	0	0	0	0	0	0	0
HMT930	Porphyromonas sp.	0	0	1.99434	0.114613	0	0	0	0.312707	0	0.218432	0	0	0.065378	0	0	3.902	0	0.119726	0	0	0.281362	0	0	0	0	0.0743531	0	0	0	0	0	0	0.0791957	0	0	0.315114	0	0	0	0	0	0	0	0.083274	0	0	0	0
HMT931	Bergeyella sp.	0	0	0	0	0	0	0	0	0	0	0	0	0	0	0	0	0	0.199544	0	0	0	0	0	0	0	0	0	0	0	0	0	0	0	0	0	0	0	0	0	0	0	0	0	0	0	0	0	0
HMT932	Kingella sp.	0	0	0	0	0	0	0	0	0	0	0	0	0	0	0	0	0	0	0	0	0	0	0	0	0	0	0	0	0	0	0	0	0	0	0	0	0	0	0	0	0	0	0	0	0	0	0	0
HMT935	Fastidiosipila sanguinis	0	0	0	0	0	0	0.0840605	0	0	0	0	0	0.0560383	0	0	0	0.0748917	0	0	0	0	0	0	0	0	0	0	0	0	0	0	0	0	0	0	0	0	0	0	0	0	0	0	0	0	0	0	0
HMT939	Olsenella sp.	0	0	0	0	0	0	0	0	0	0	0	0	0	0	0	0	0	0	0	0	0	0	0	0	0	0	0	0	0	0	0	0	0	0	0	0	0	0	0	0	0	0	0	0	0	0	0	0
HMT942	Prevotella sp.	0	0	0	0	0	0	0	0	0	0	0	0	0	0	0	0	0	0	0	0	0	0	0	0	0	0	0	0	0	0	0	0	0	0	0	0	0	0	0	0	0	0	0	0	0	0	0	0
HMT943	Prevotella aurantiaca	0	0	0	0	0	0	0	0.156354	0	0	0	0	0	0	0	0	0	0	0	0	0	0	0	0	0	0	0	0	0.0506716	0	0	0	0	0	0	0	0	0	0.156396	0	0	0	0	0	0	0	0	0
HMT949	Aggregatibacter sp.	0	0	0	0	0	0	0	0	0	0	0	0	0	0	0	0	0	0	0	0	0	0	0	0	0	0	0	0	0	0	0	0	0	0	0	0	0	0	0	0	0	0	0	0	0	0	0	0
HMT950	Peptostreptococcaceae [XI][G-3] sp.	0	0	0	0	0	0	0	0	0	0	0	0	0	0	0	0	0	0	0	0	0	0	0	0	0	0	0	0	0	0	0	0	0	0	0	0	0	0	0	0	0	0	0	0	0	0	0	0
HMT708	Actinomyces oricola	0	0	0	0	0	0	0	0	0	0	0	0	0	0	0	0	0	0	0	0	0	0	0	0	0	0	0	0	0	0	0	0	0	0	0	0	0	0	0	0	0	0	0	0	0	0	0	0
[truncated: 43 more columns]
